# Supplementary material for: Possible Ancestral Structure in Human Populations
Source: PLoS Genet. 2006 Jul 28;2(7):e105. doi: 10.1371/journal.pgen.0020105 (PMC1523253; doi:10.1371/journal.pgen.0020105)

abcb1, p-value: 0.04

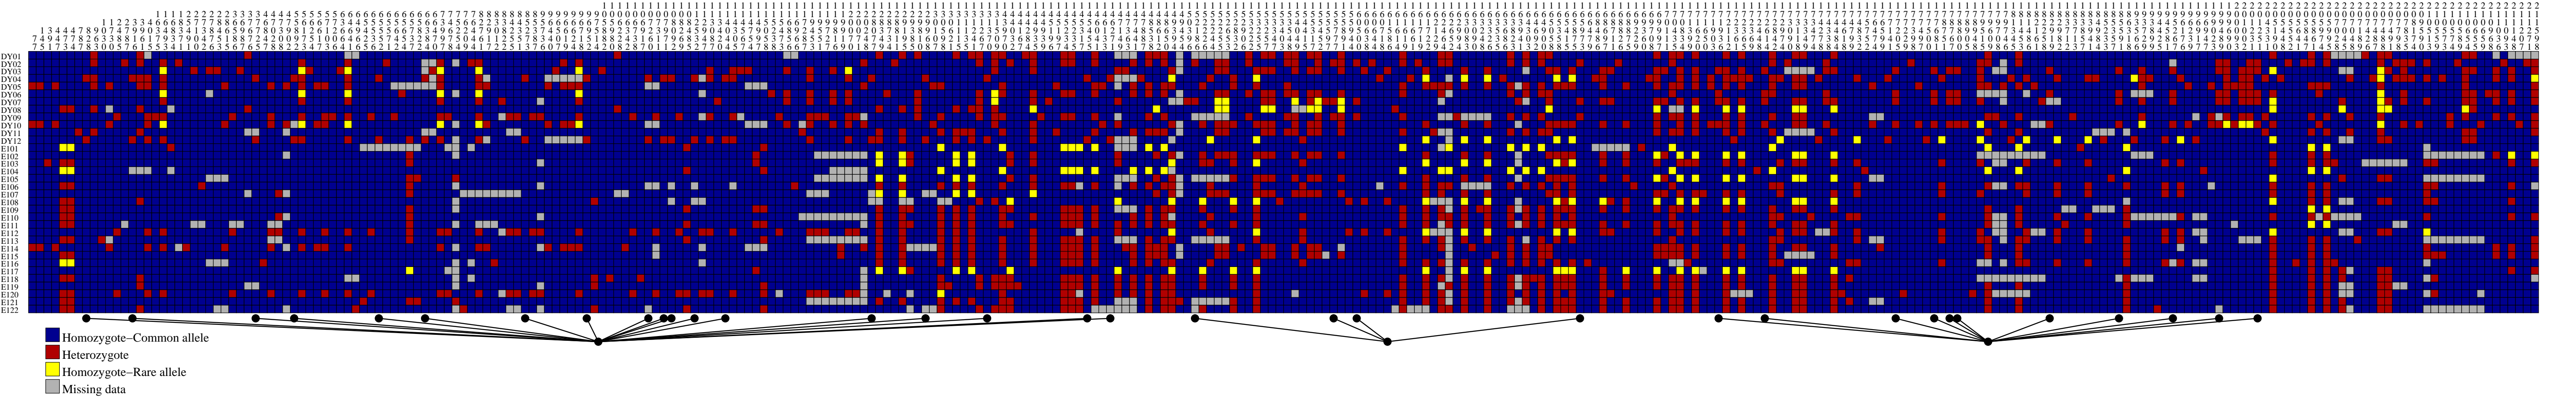

abl1, p-value: 0.0832

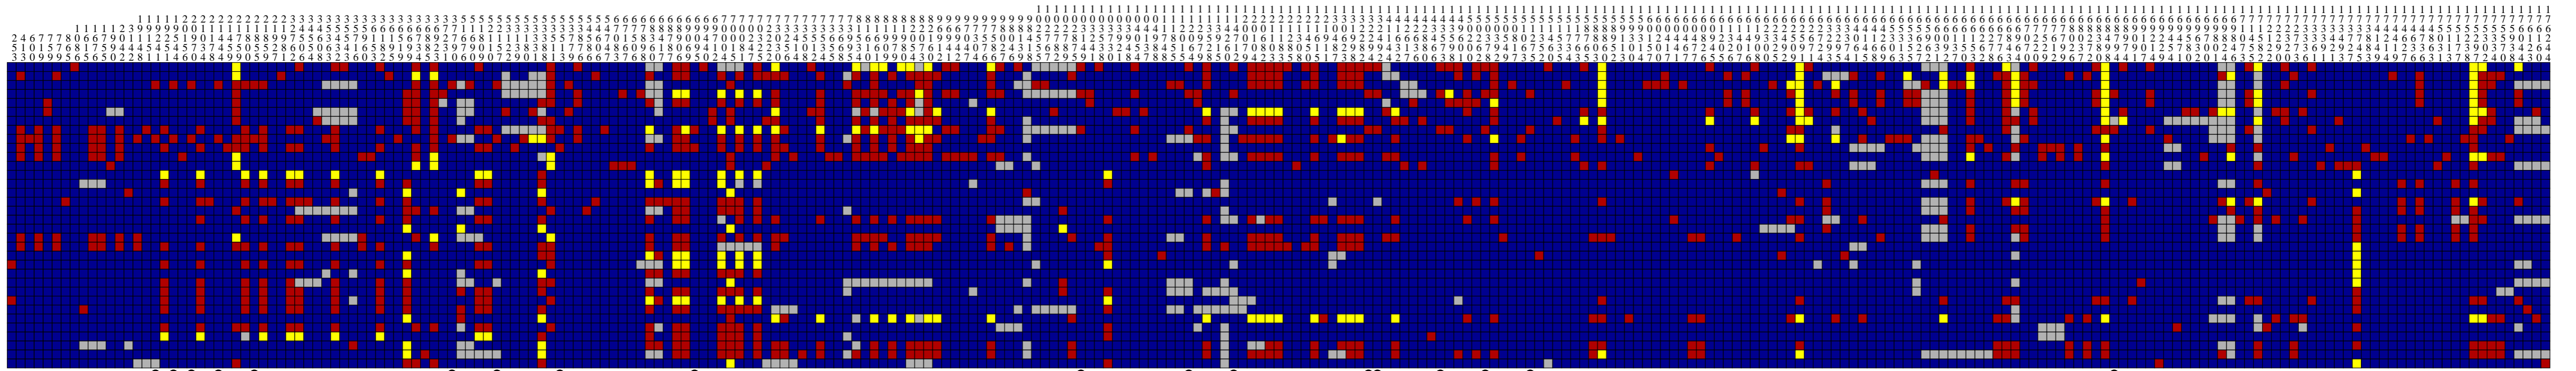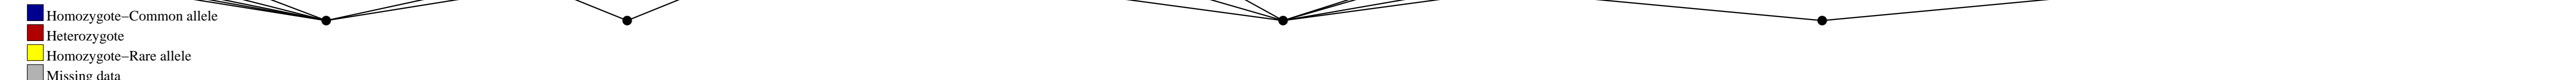

abl2, p-value: 0.1898

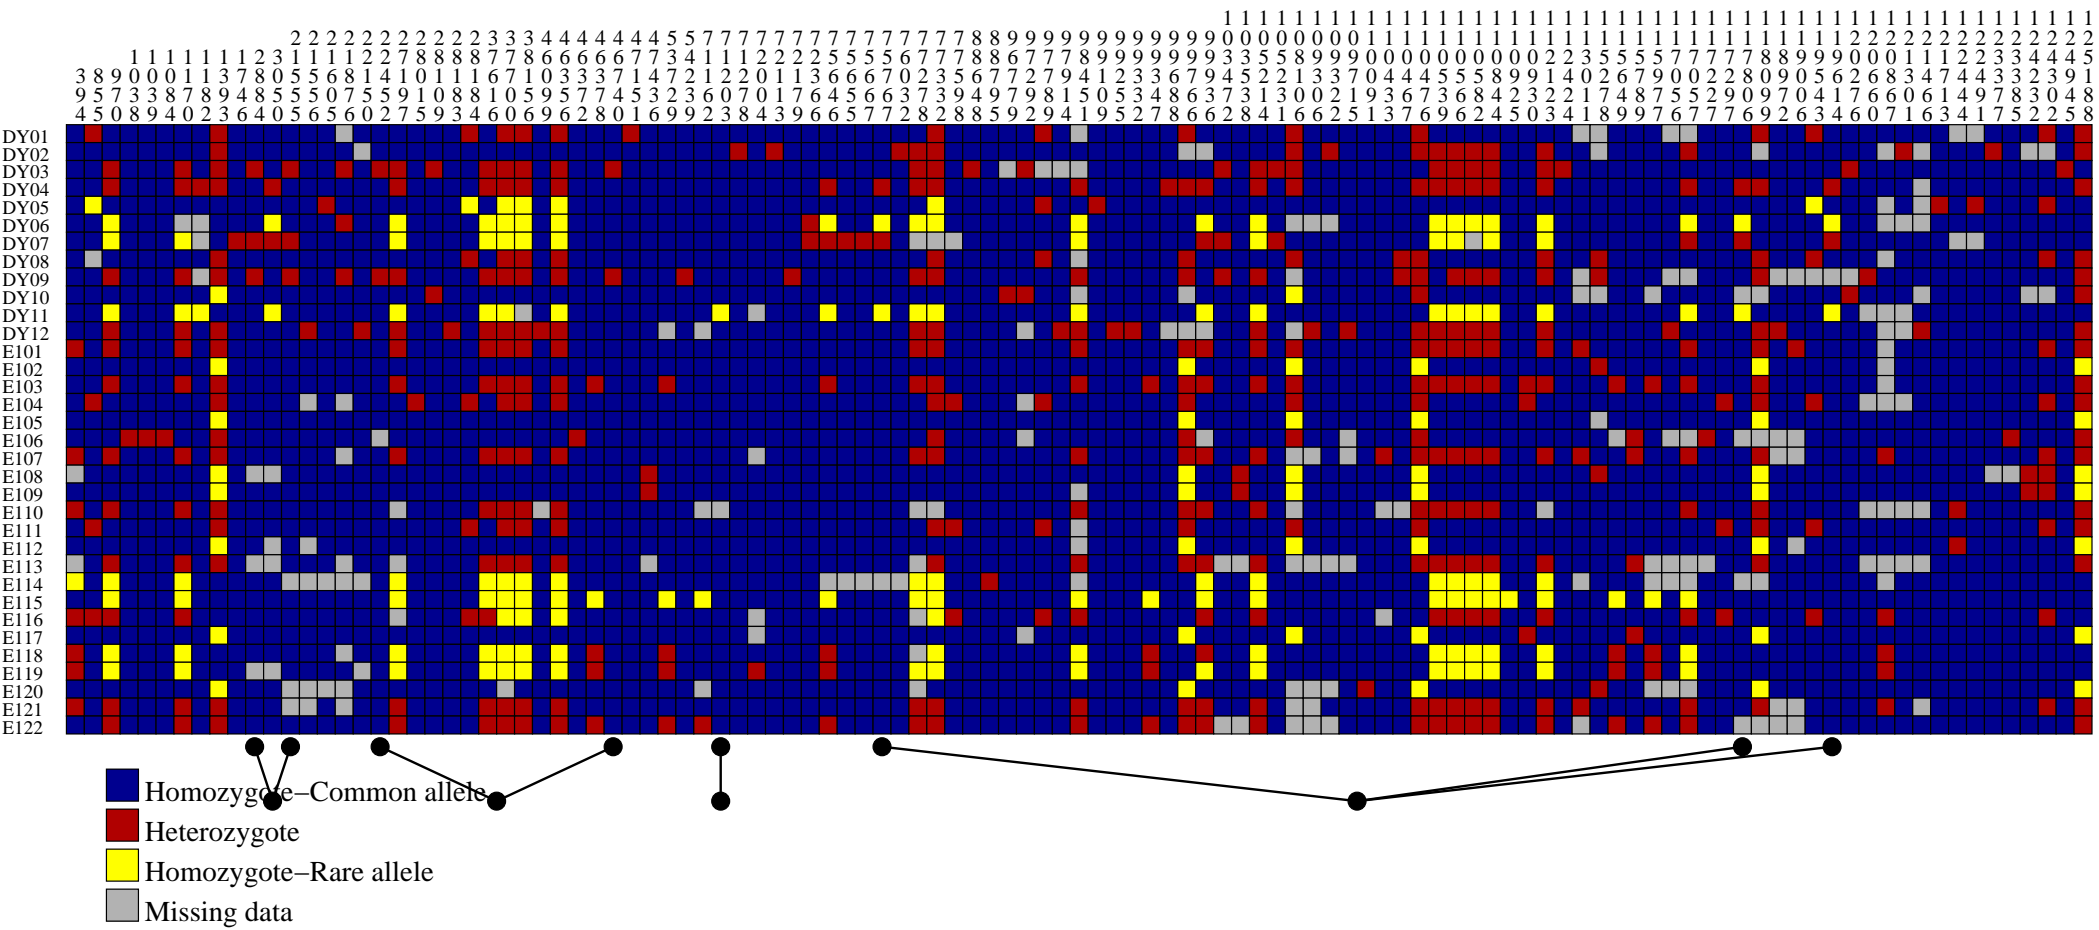

abp1, p-value: 0.516

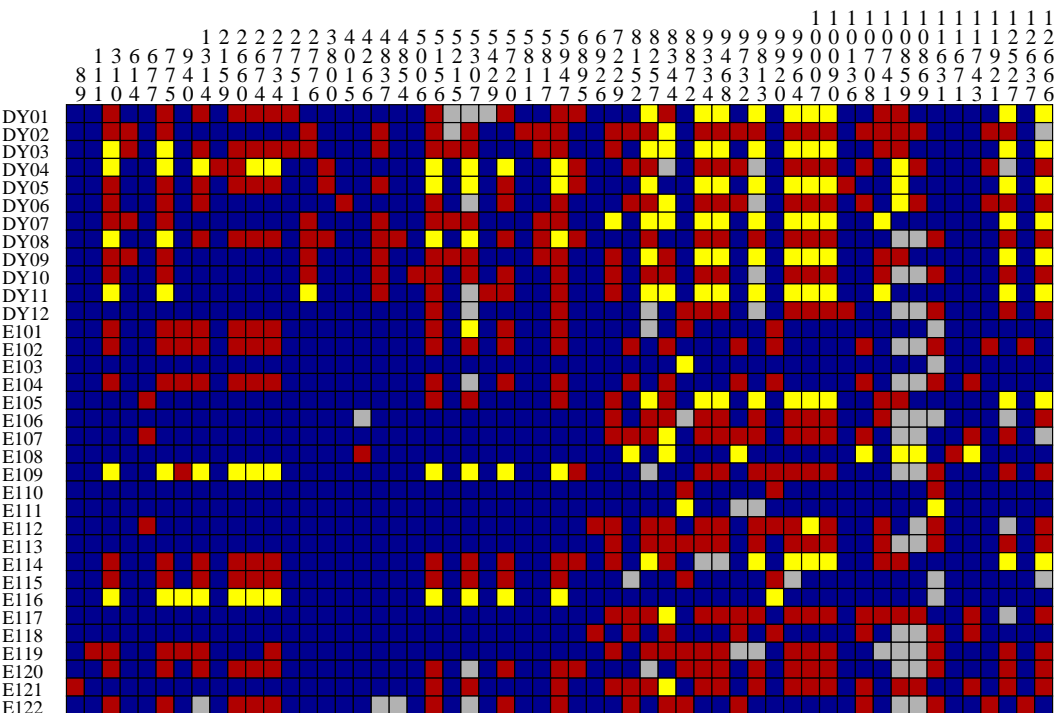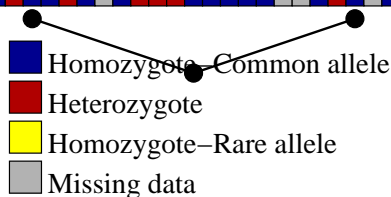



adh1b, p-value: 0.2956

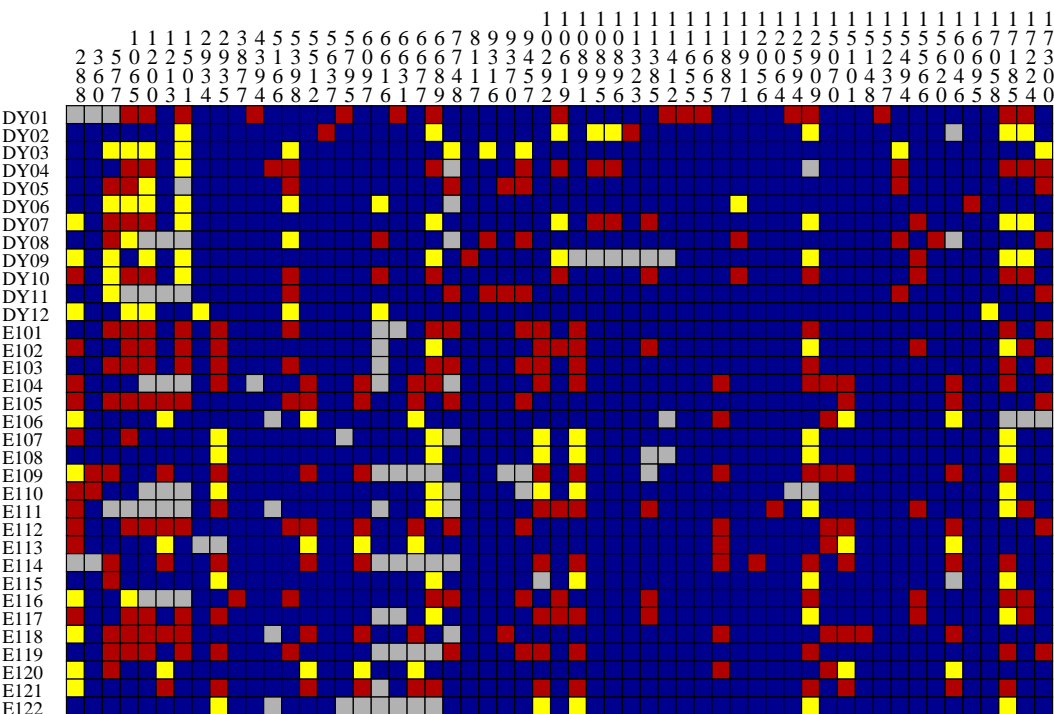

adh1c, p-value: 0.8998

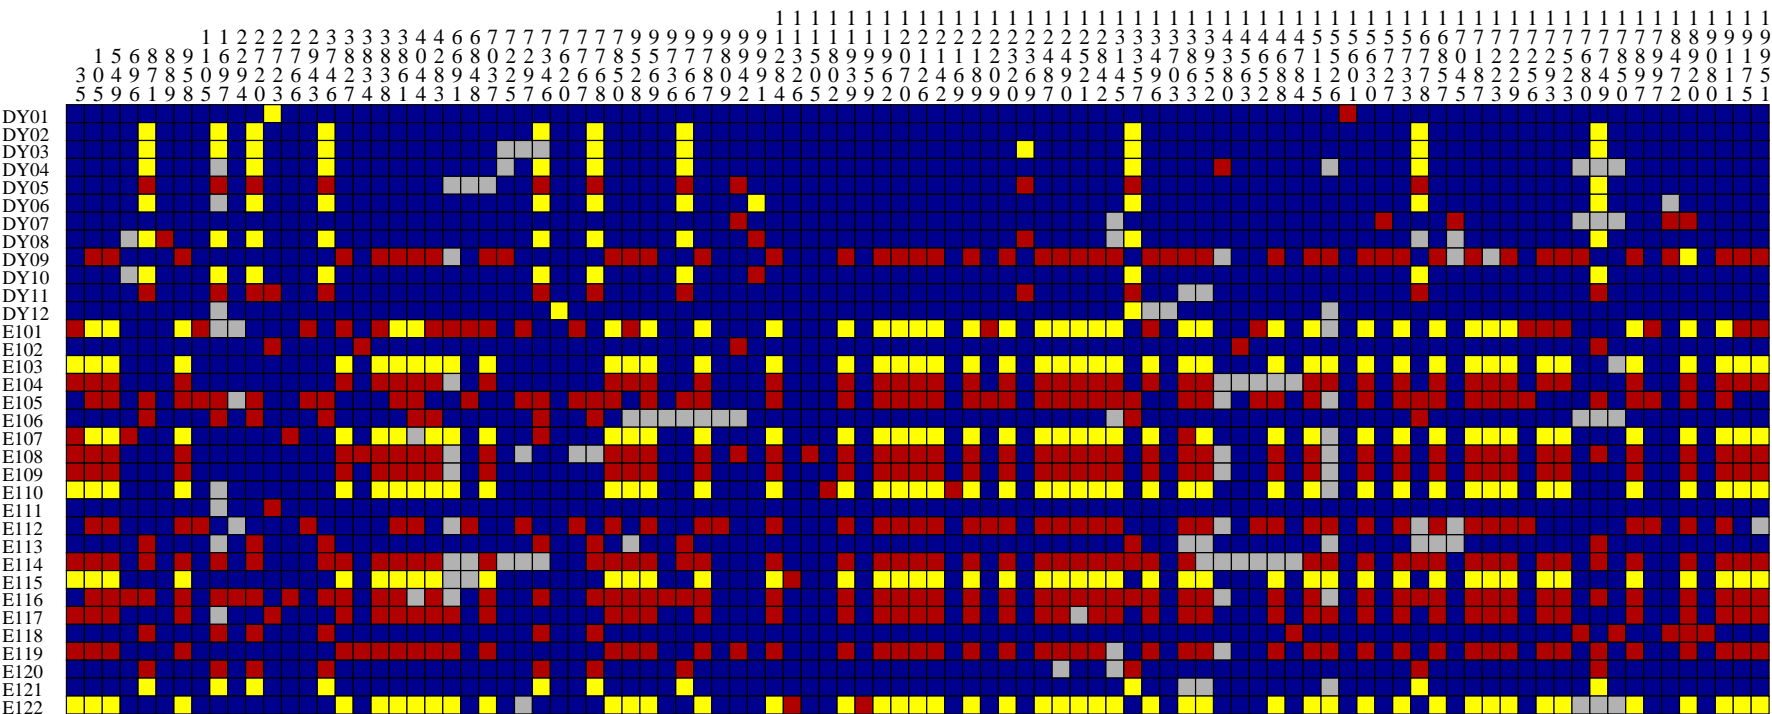

■ Homozygote–Common allele

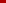 Heterozygote

■ Homozygote–Rare allele

Missing data

adh4, p-value: 0.6472

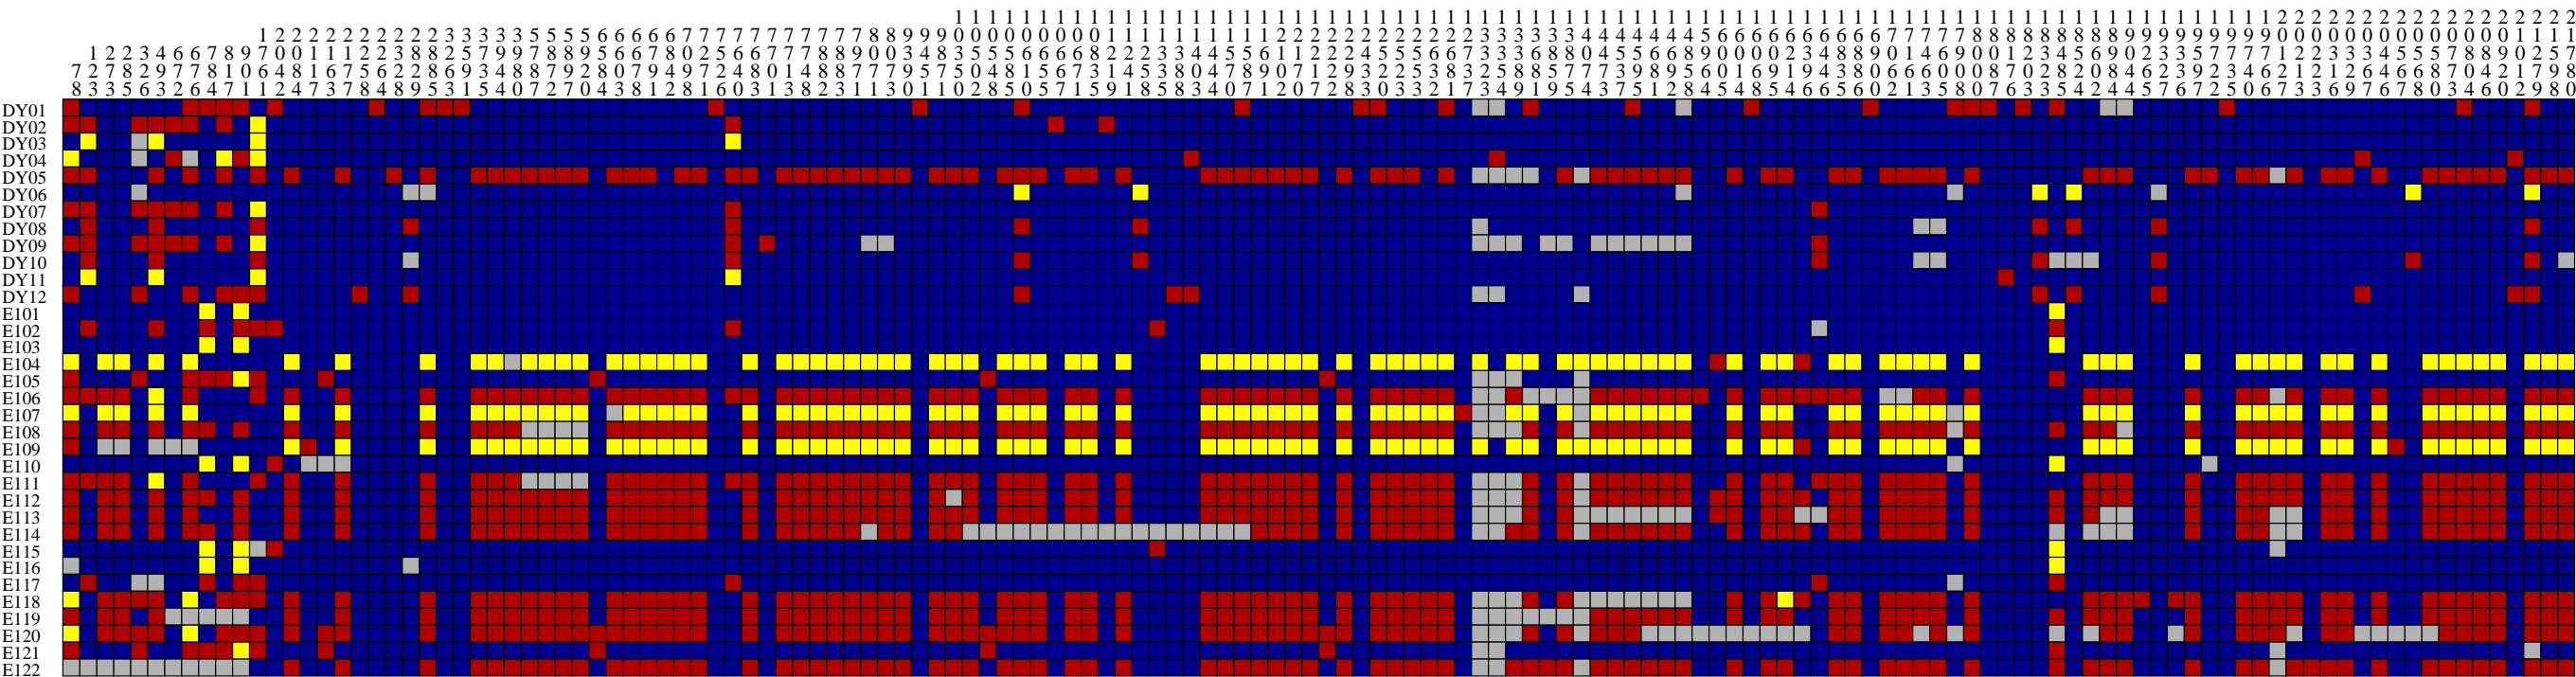

- Homozygote-Common allele
- Heterozygote
- Homozygote-Rare allele
- Missing data

adh5, p-value: 0.2132

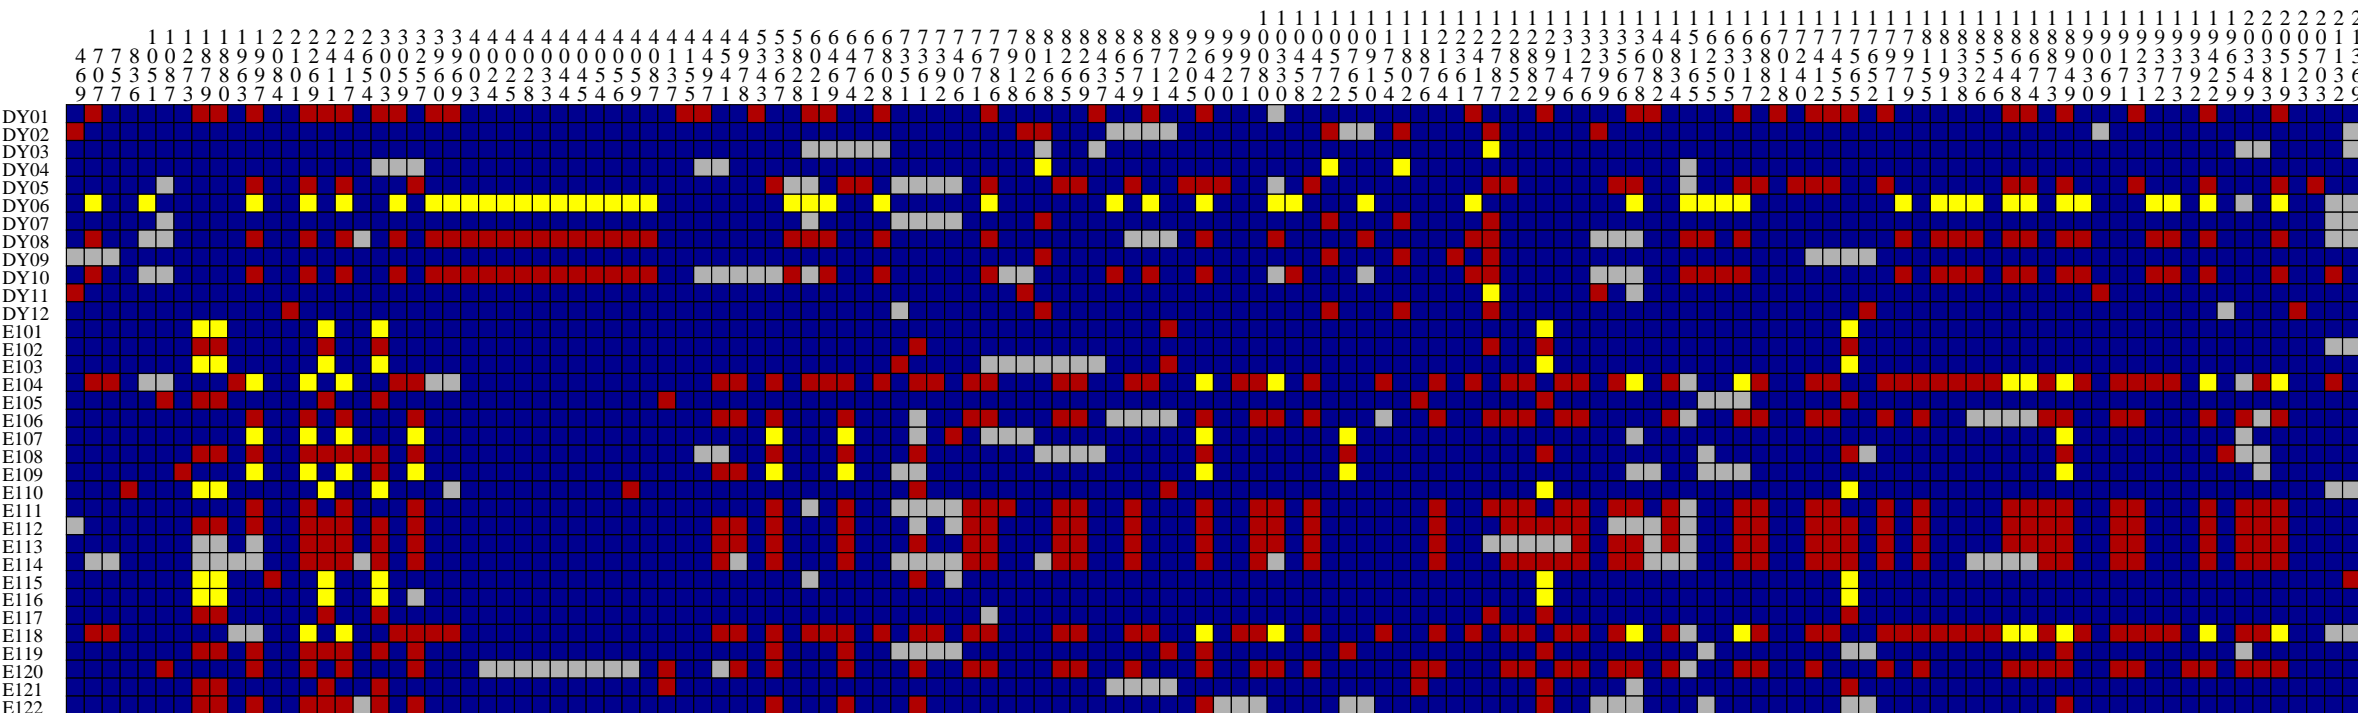

- Homozygote-Common allele
- Heterozygote
- Homozygote-Rare allele
- Missing data

[illegible]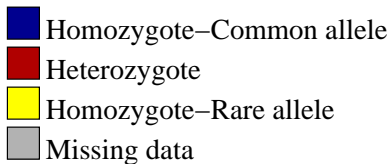

adm, p-value: 0.5232

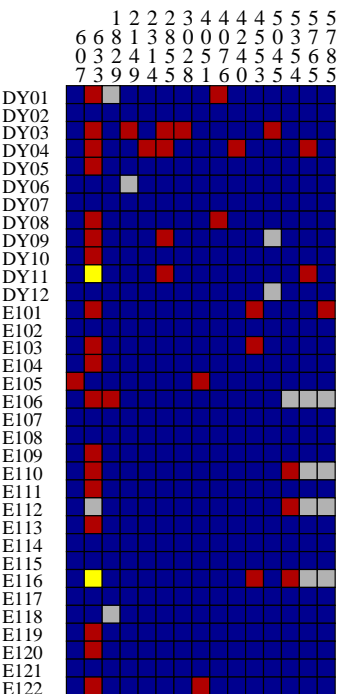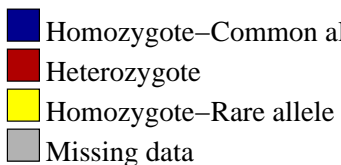

angptl7, p-value: 0.046

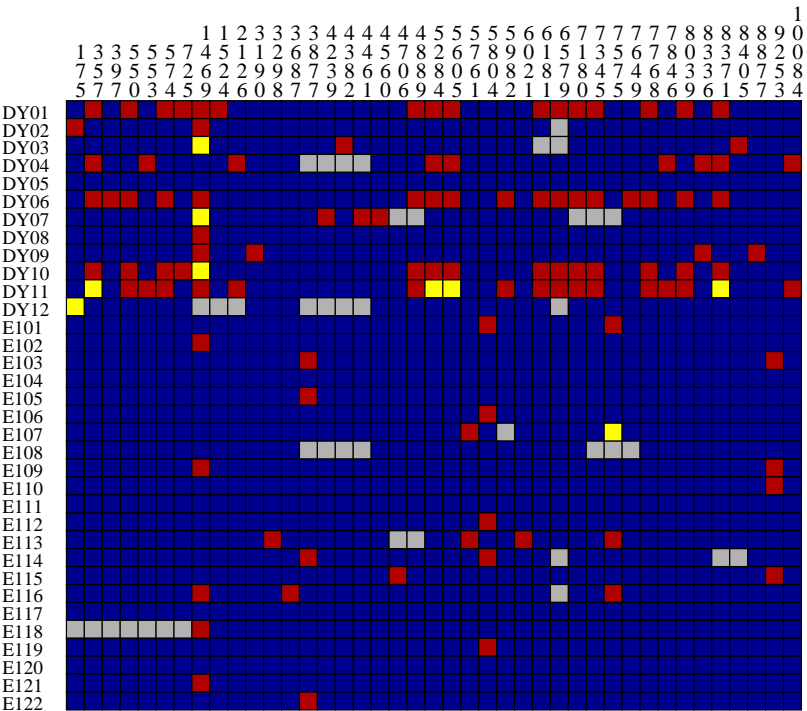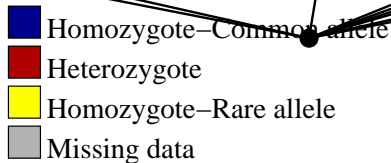

aoc2, p-value: 0.2106

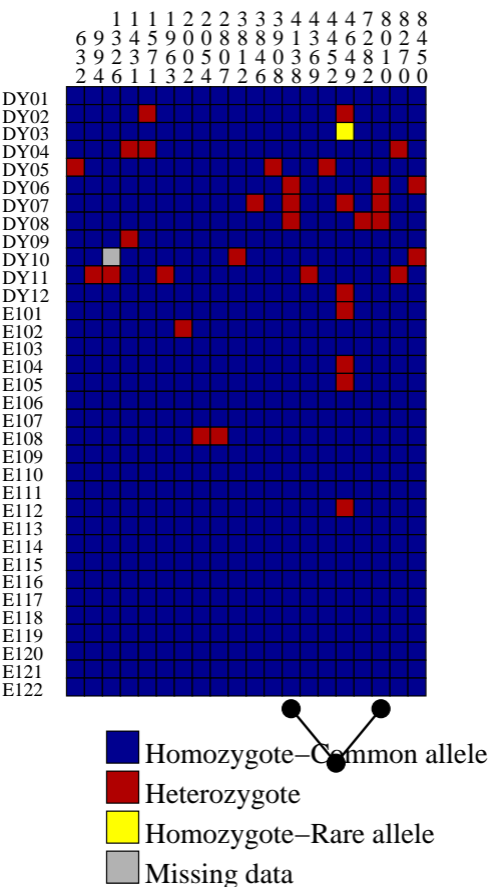

aoc3, p-value: 0.1488

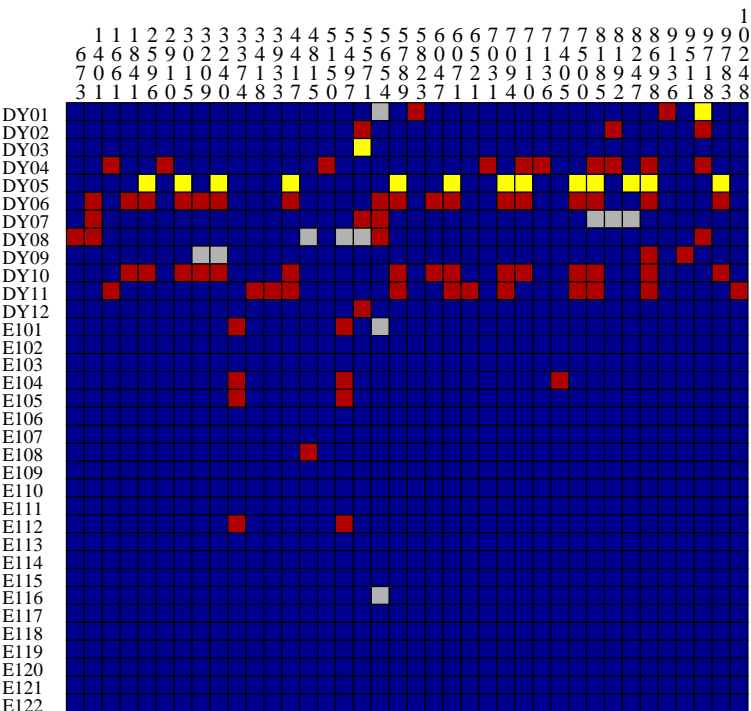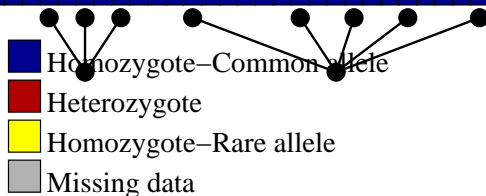

app, p-value: 0.0804

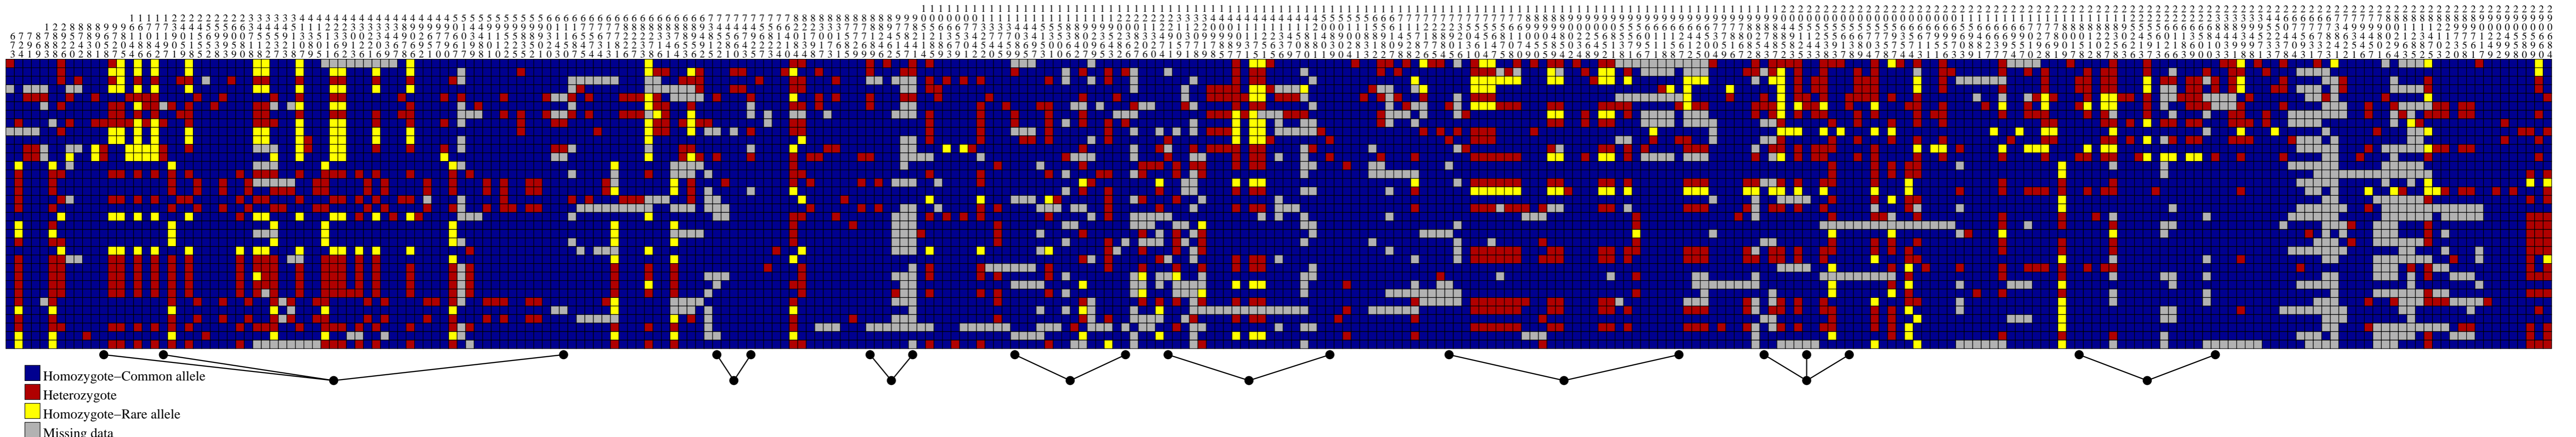

atox1, p-value: 0.2204

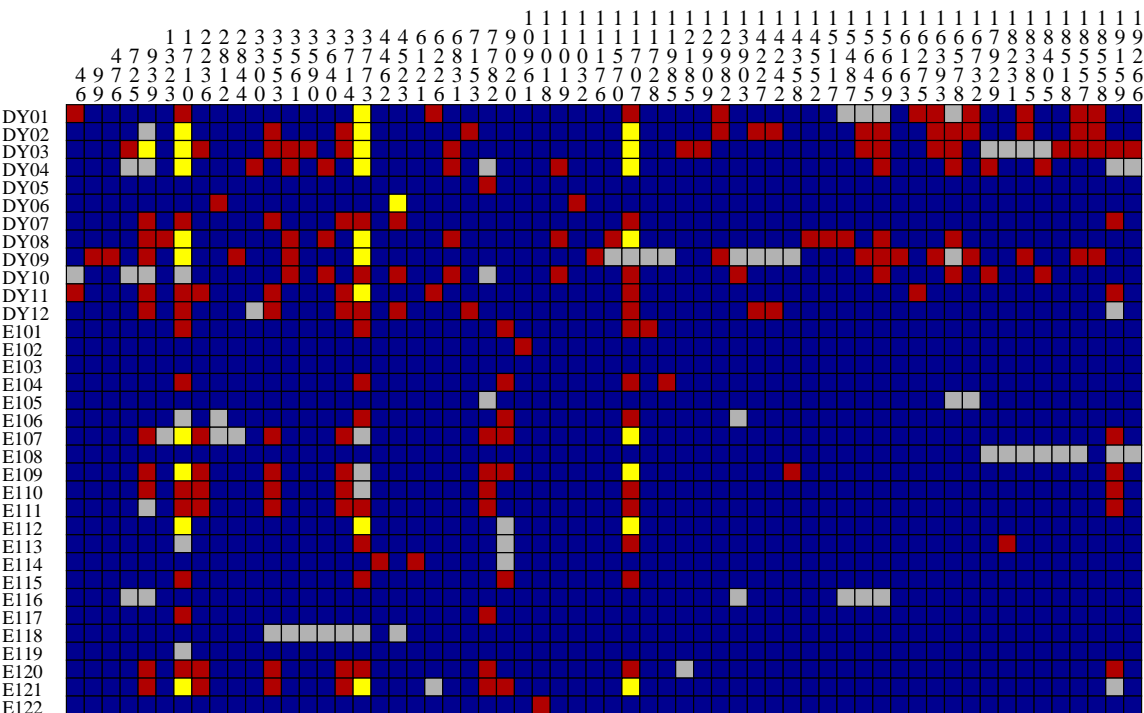

■ Homozygote-Common allele  
■ Heterozygote  
■ Homozygote-Rare allele  
■ Missing data

bace1, p-value: 0.3992

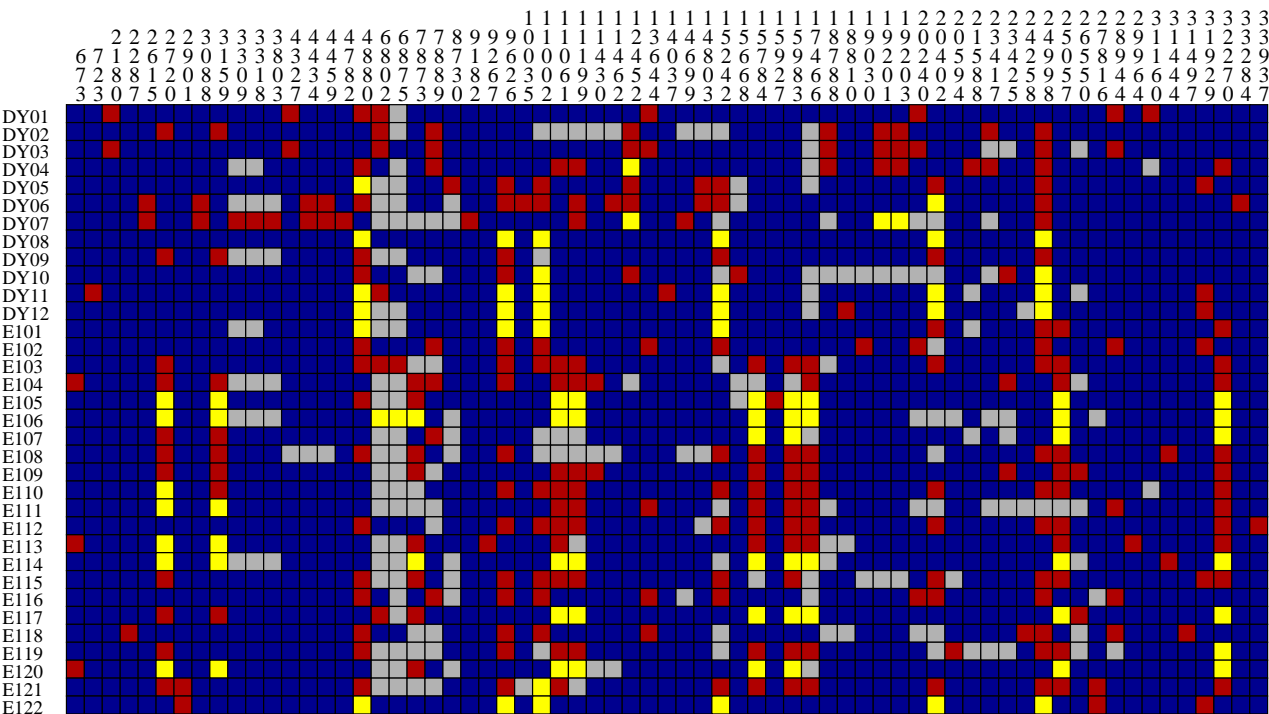

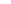 Homozygote–Common allele

Heterozygote

■ Homozygote–Rare allele

■ Missing data

birc2, p-value: 0.2594

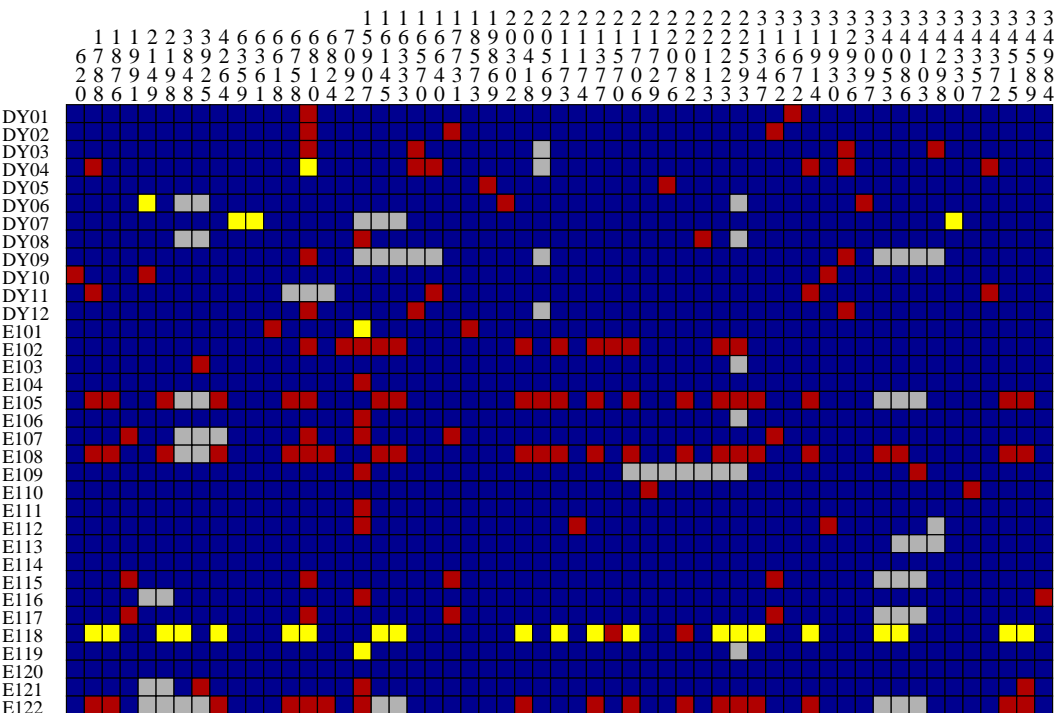

■ Homozygote–Common allele

Heterozygote

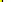 Homozygote–Rare allele

Missing data

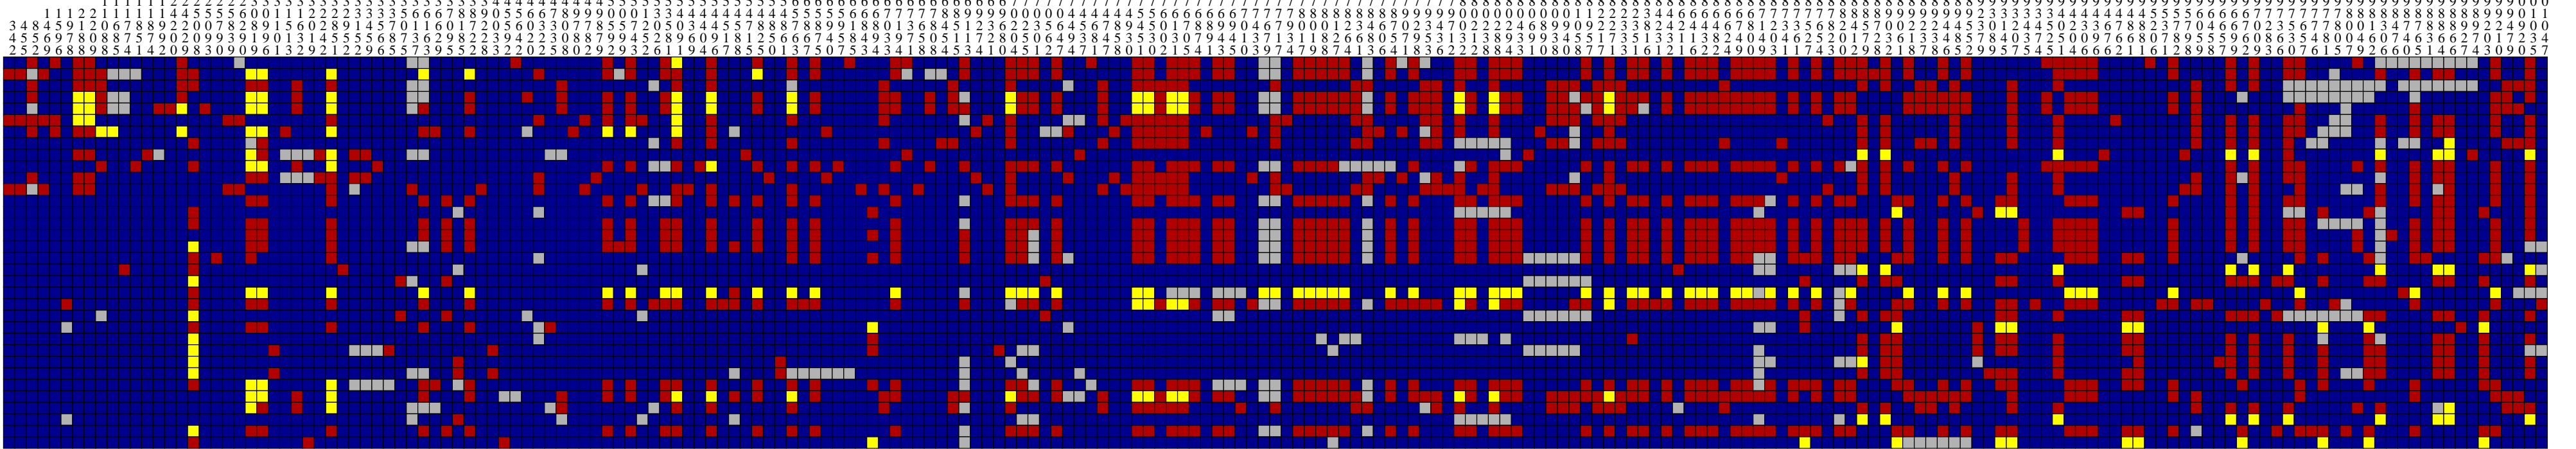

bnip3, p-value: 0.3766

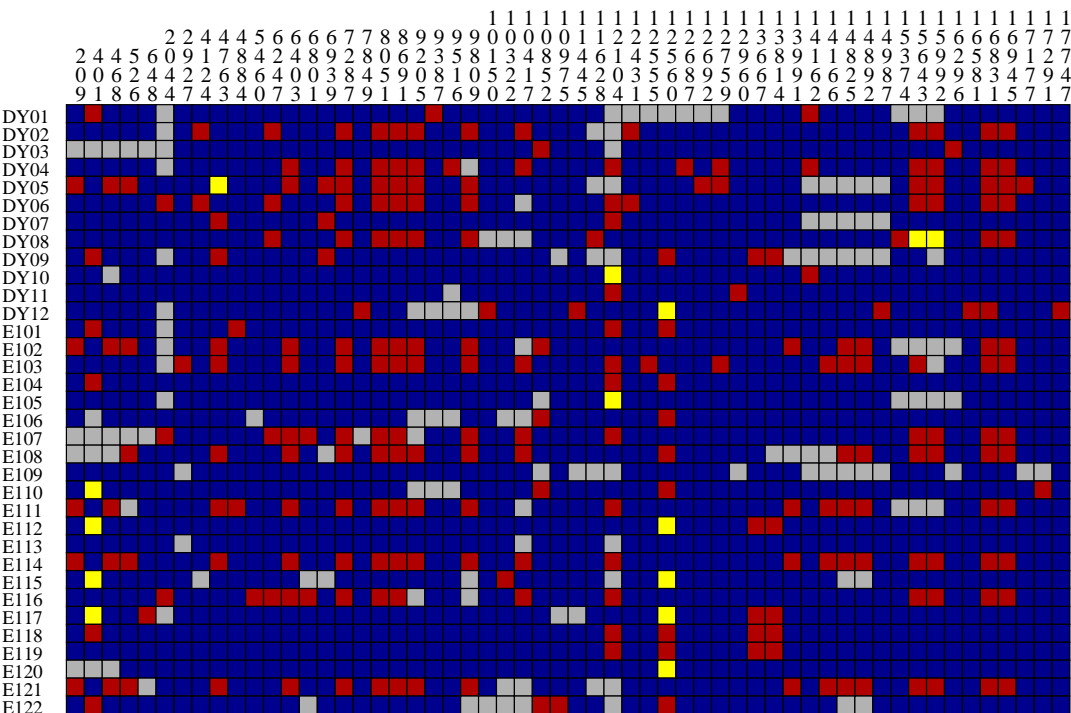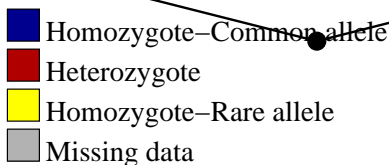

calca, p-value: 0.1004

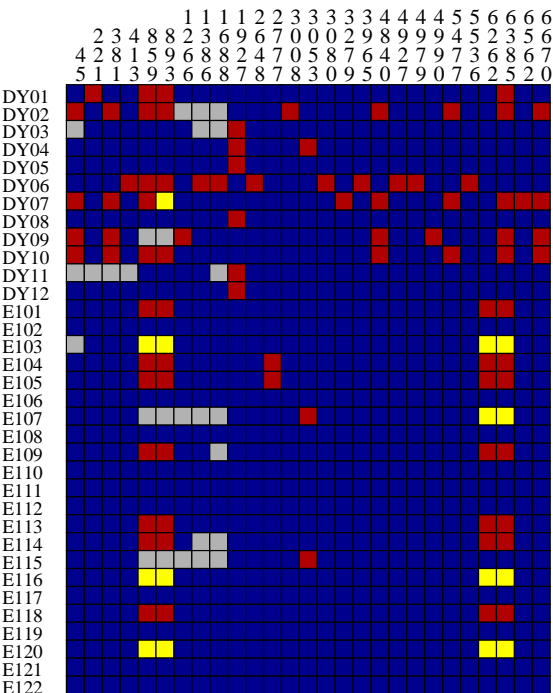

Homozygote-Common allele  
 Heterozygote  
 Homozygote-Rare allele  
 Missing data

capn3, p-value: 0.103

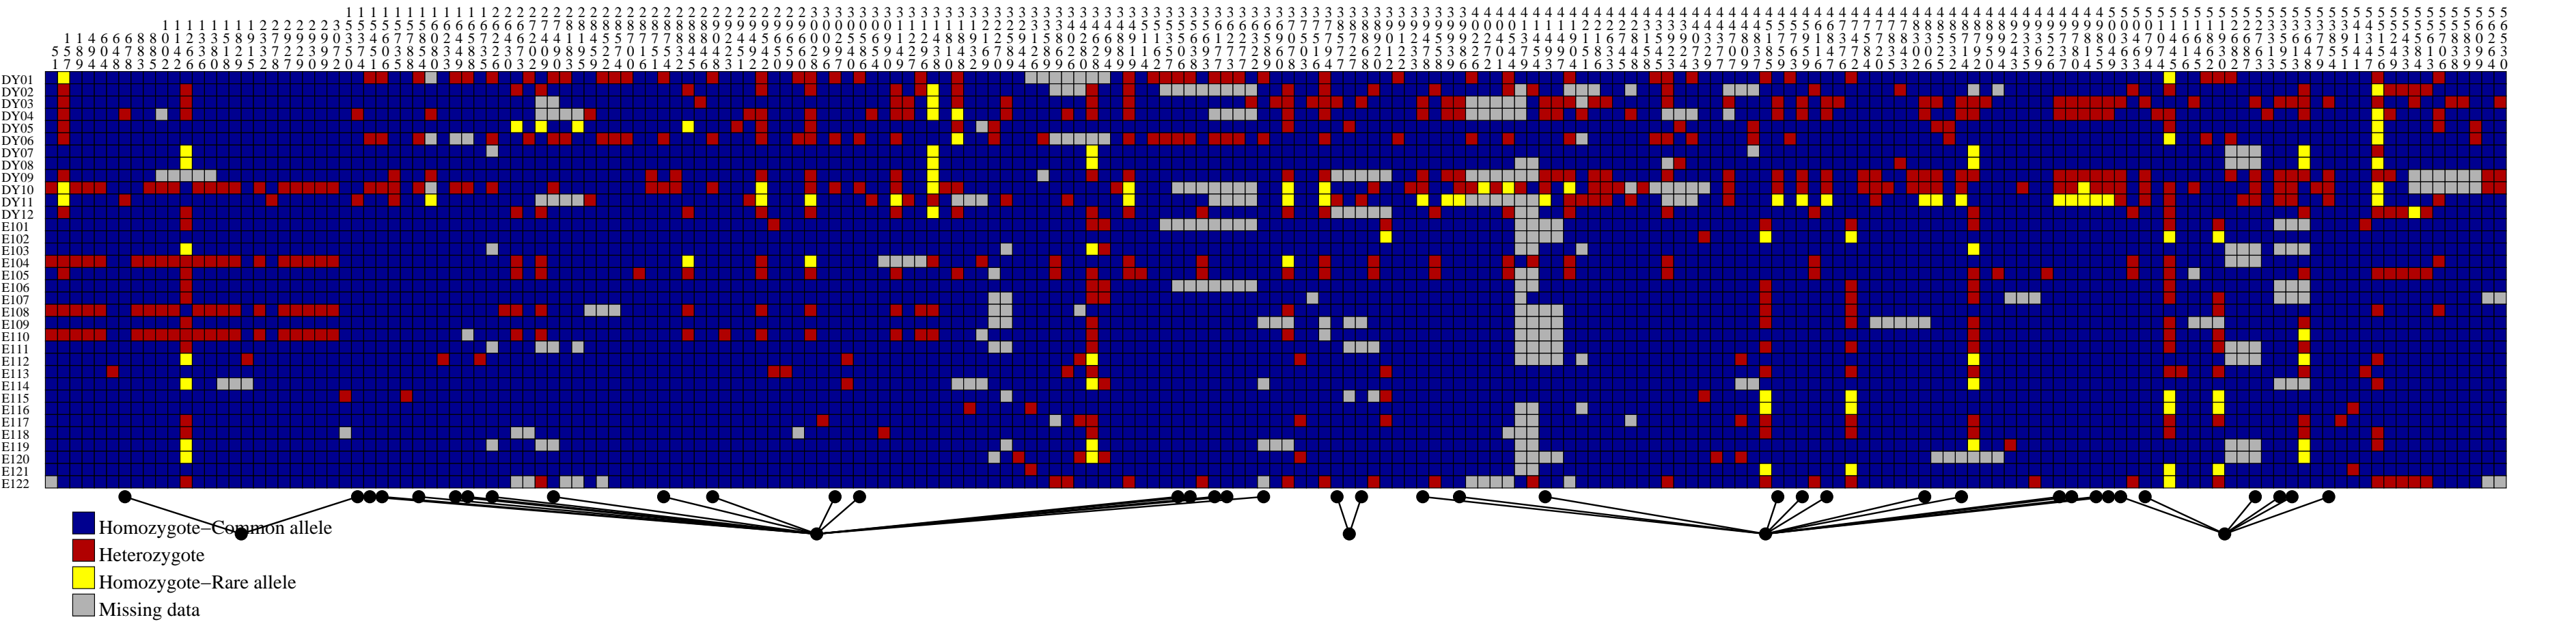



cd3z, p-value: 0.5752

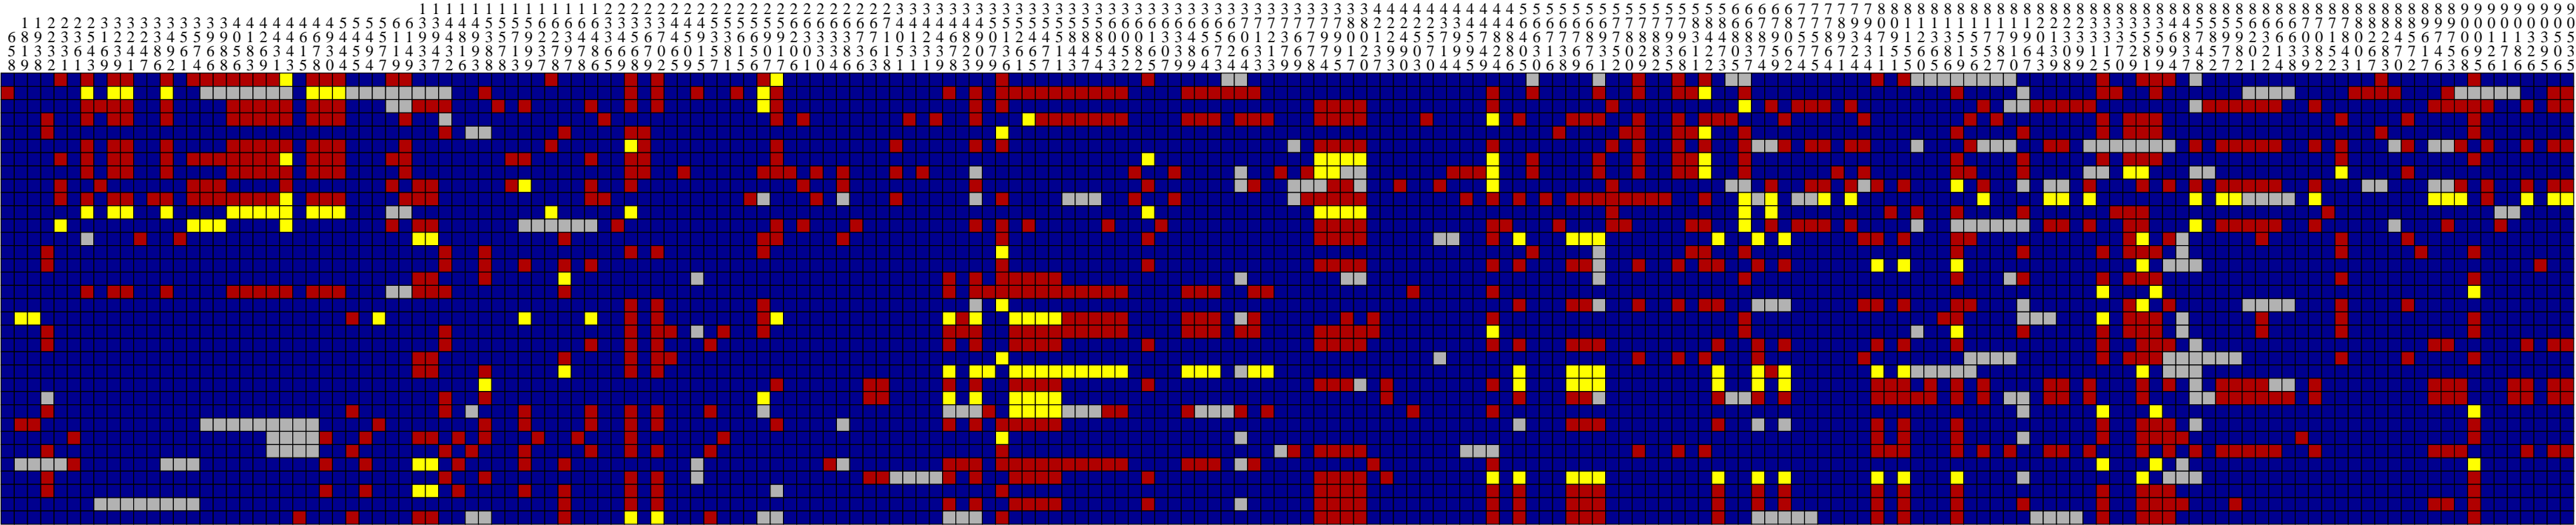

- Homozygote-Common allele
- Heterozygote
- Homozygote-Rare allele
- Missing data



[illegible]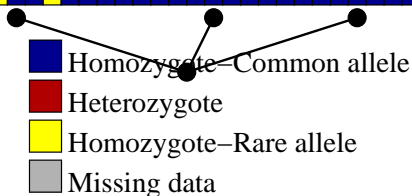

cdh1, p-value: 0.3846

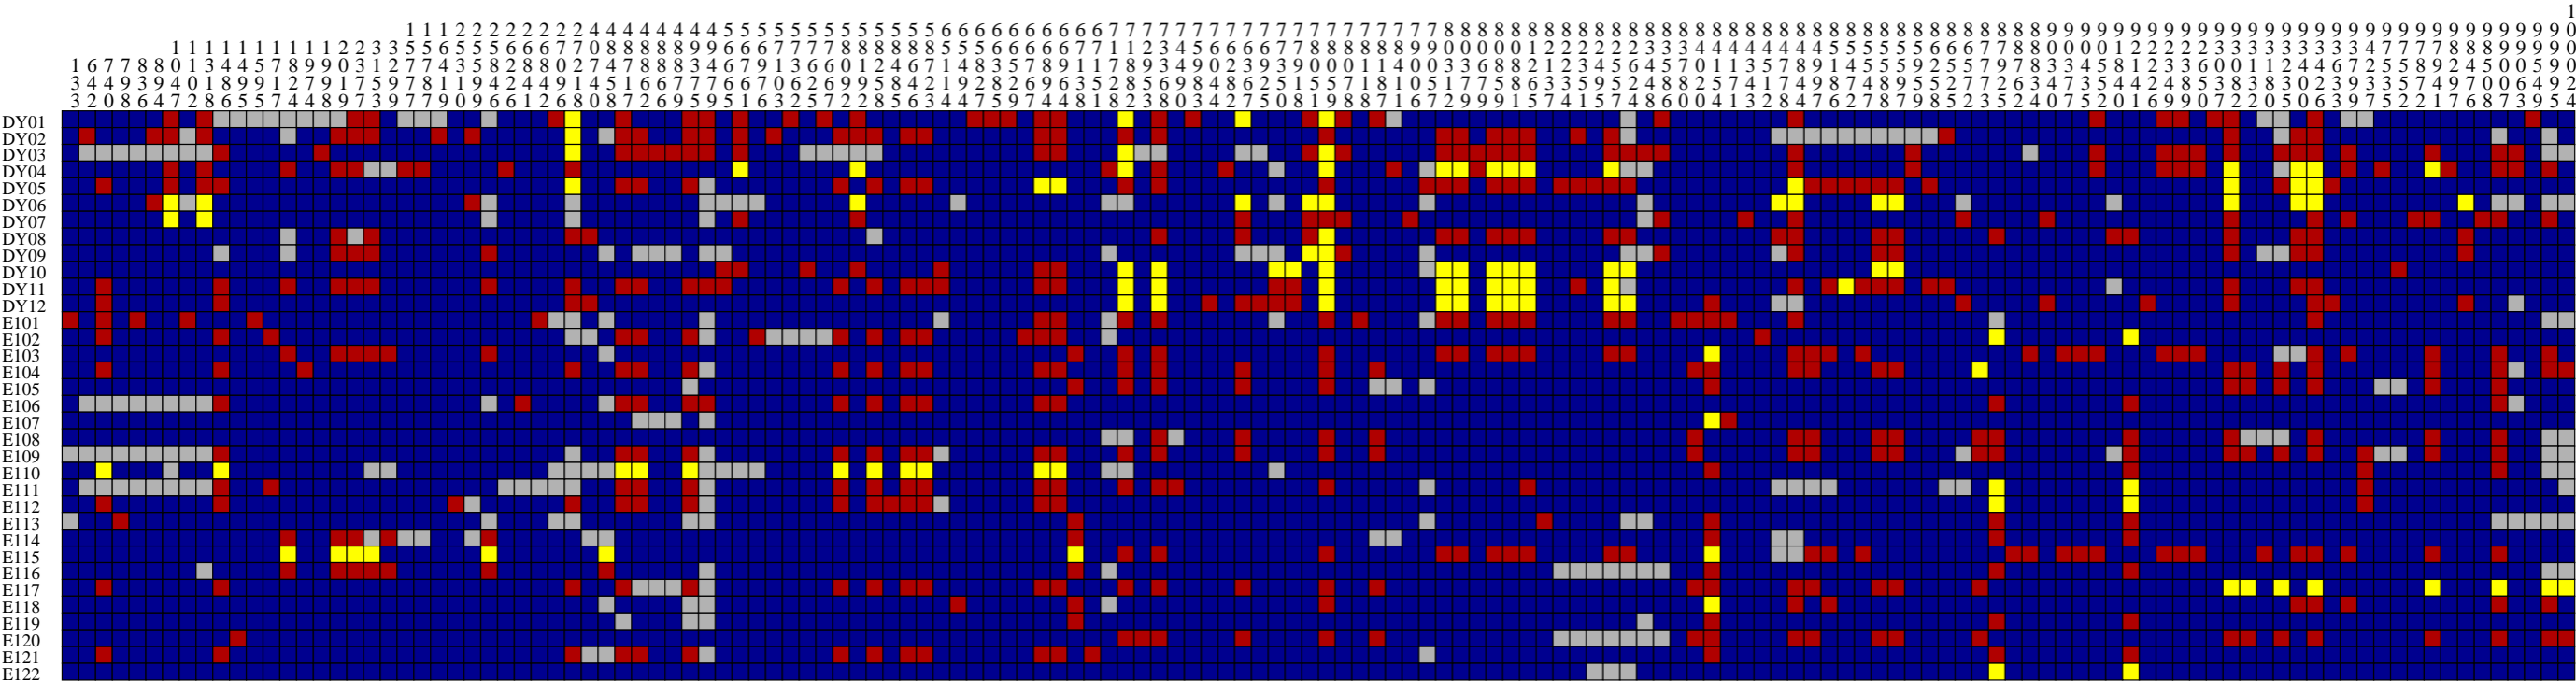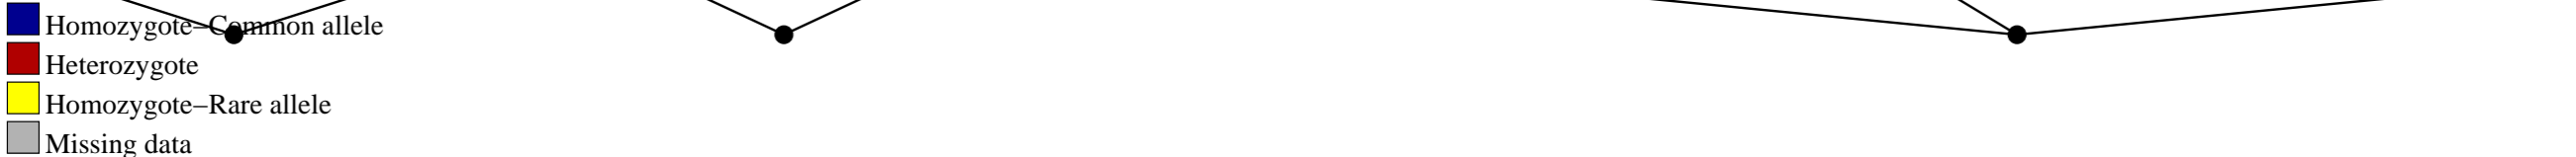



chrna4, p-value: 0.8434

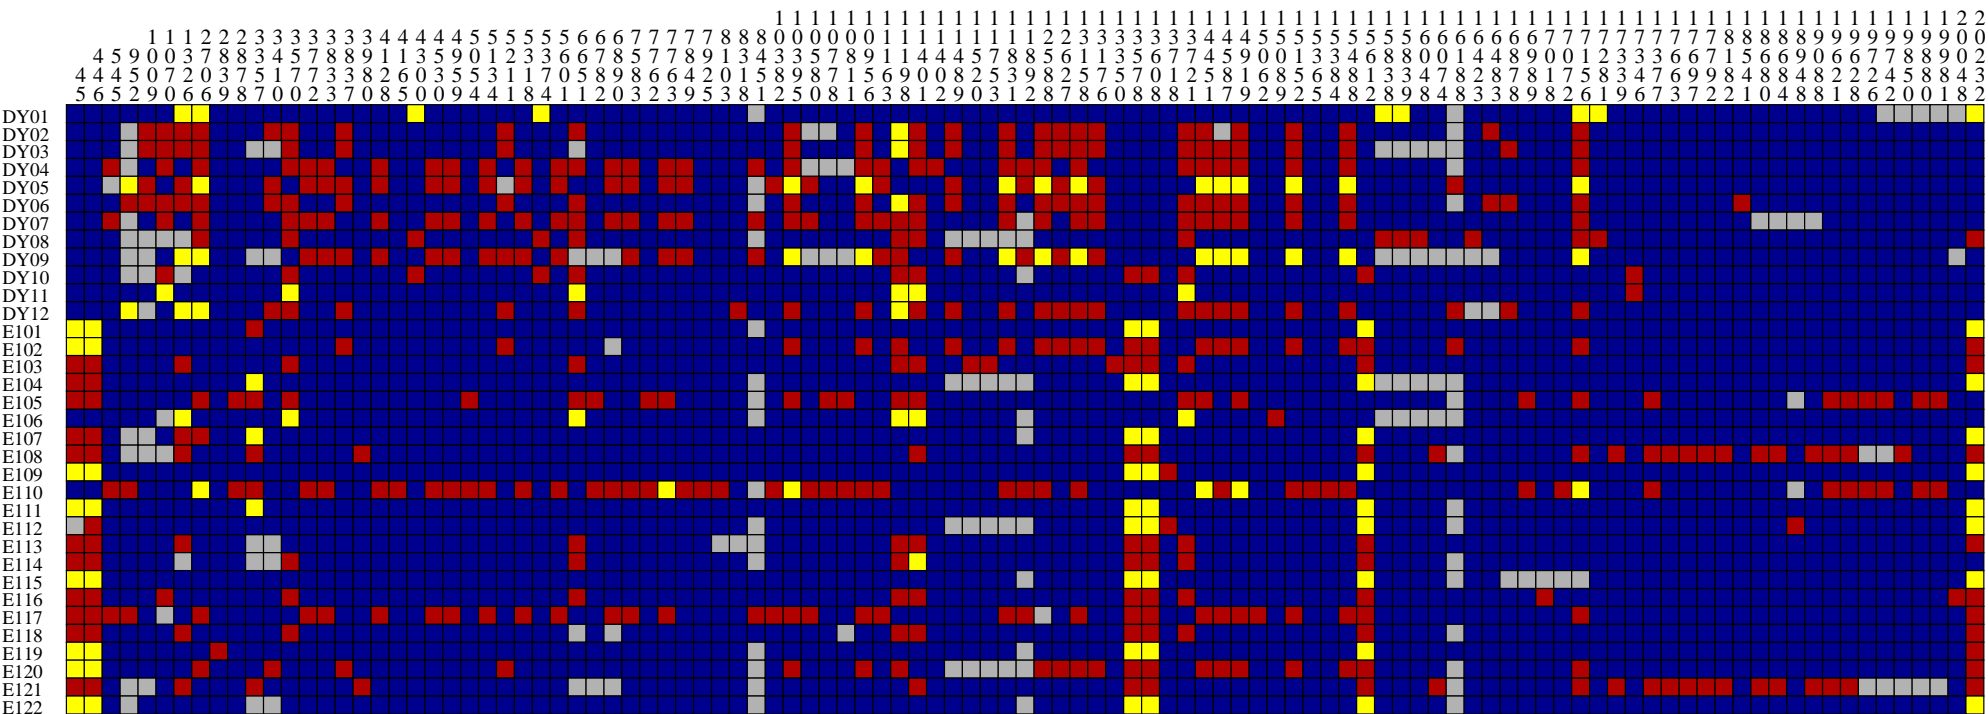

■ Homozygote–Common allele

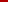 Heterozygote

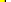 Homozygote–Rare allele

■ Missing data

csk, p-value: 0.0634

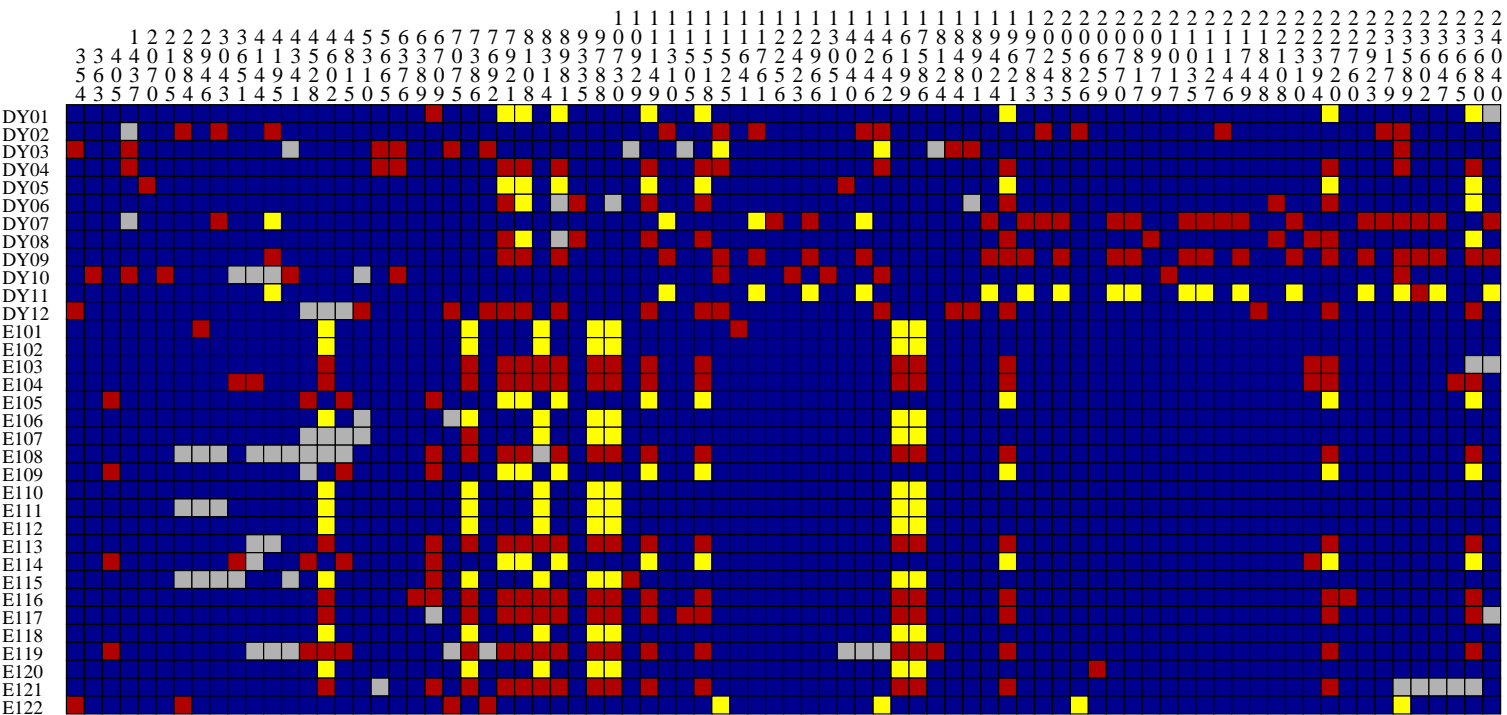

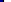 Homozygote–Common allele

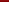 Heterozygote

■ Homozygote–Rare allele

■ Missing data

ctnna1, p-value: 0.05

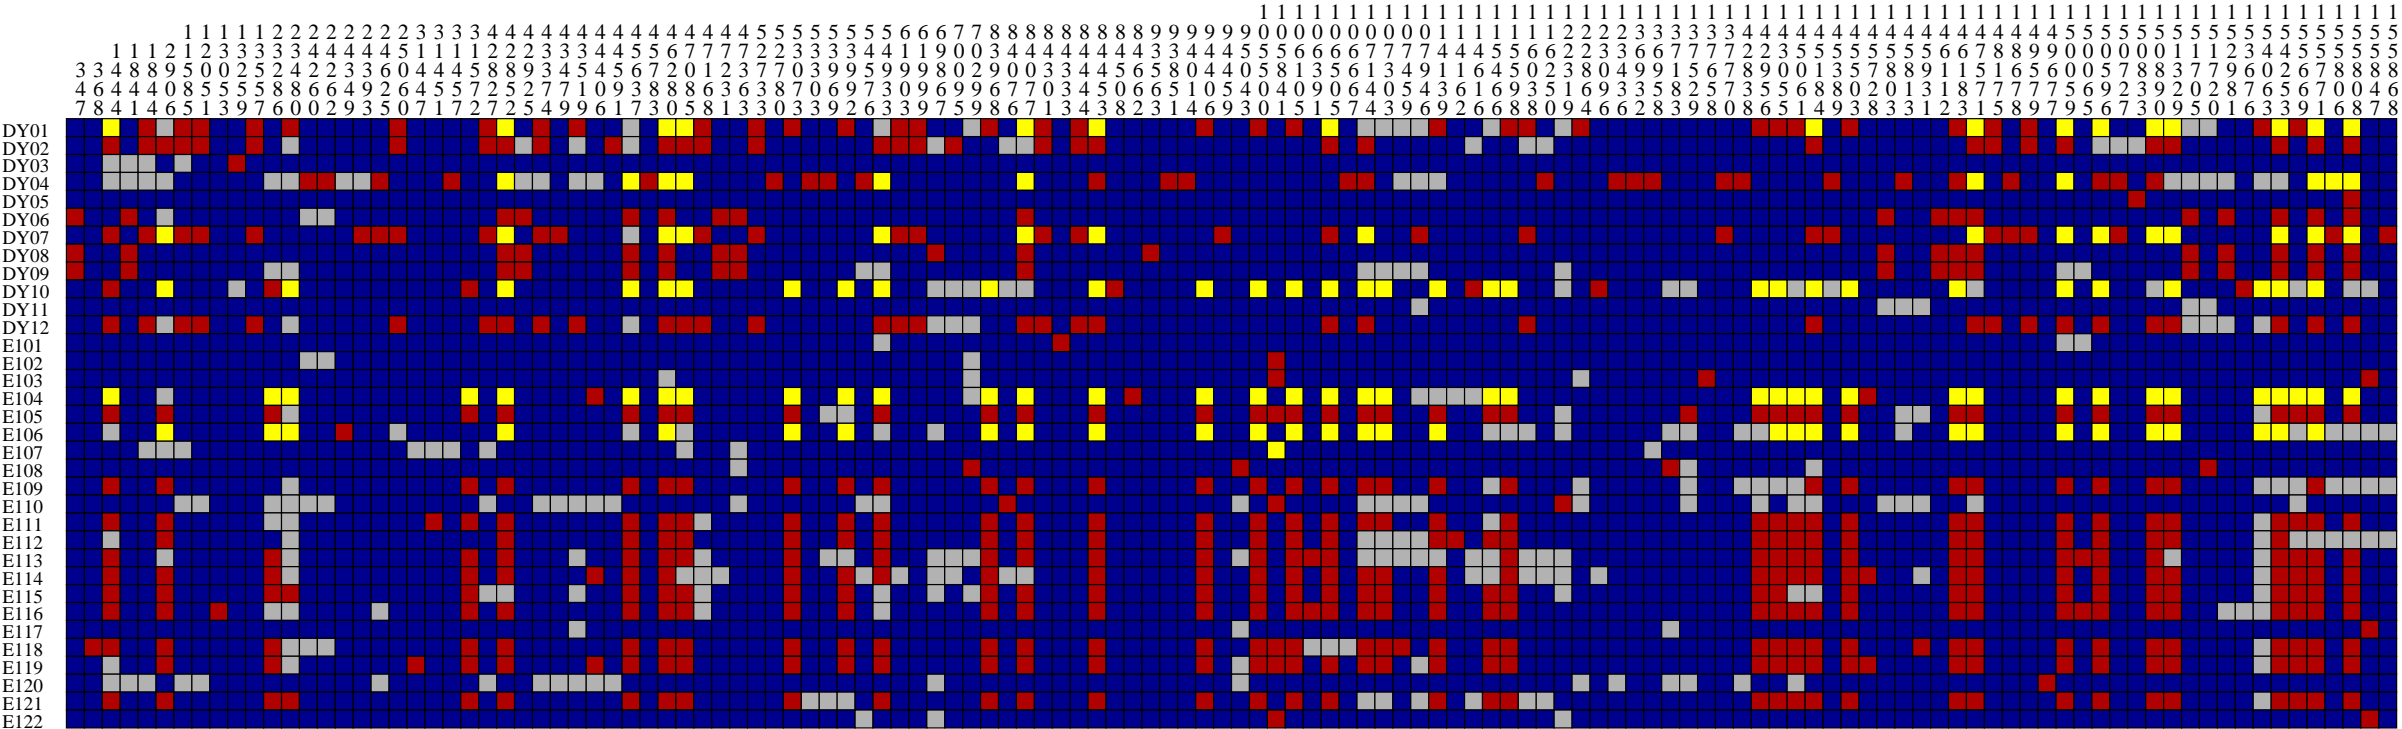

■ Homozygote-Common allele  
■ Heterozygote  
■ Homozygote-Rare allele  
■ Missing data

cyp19a1, p-value: 0.3276

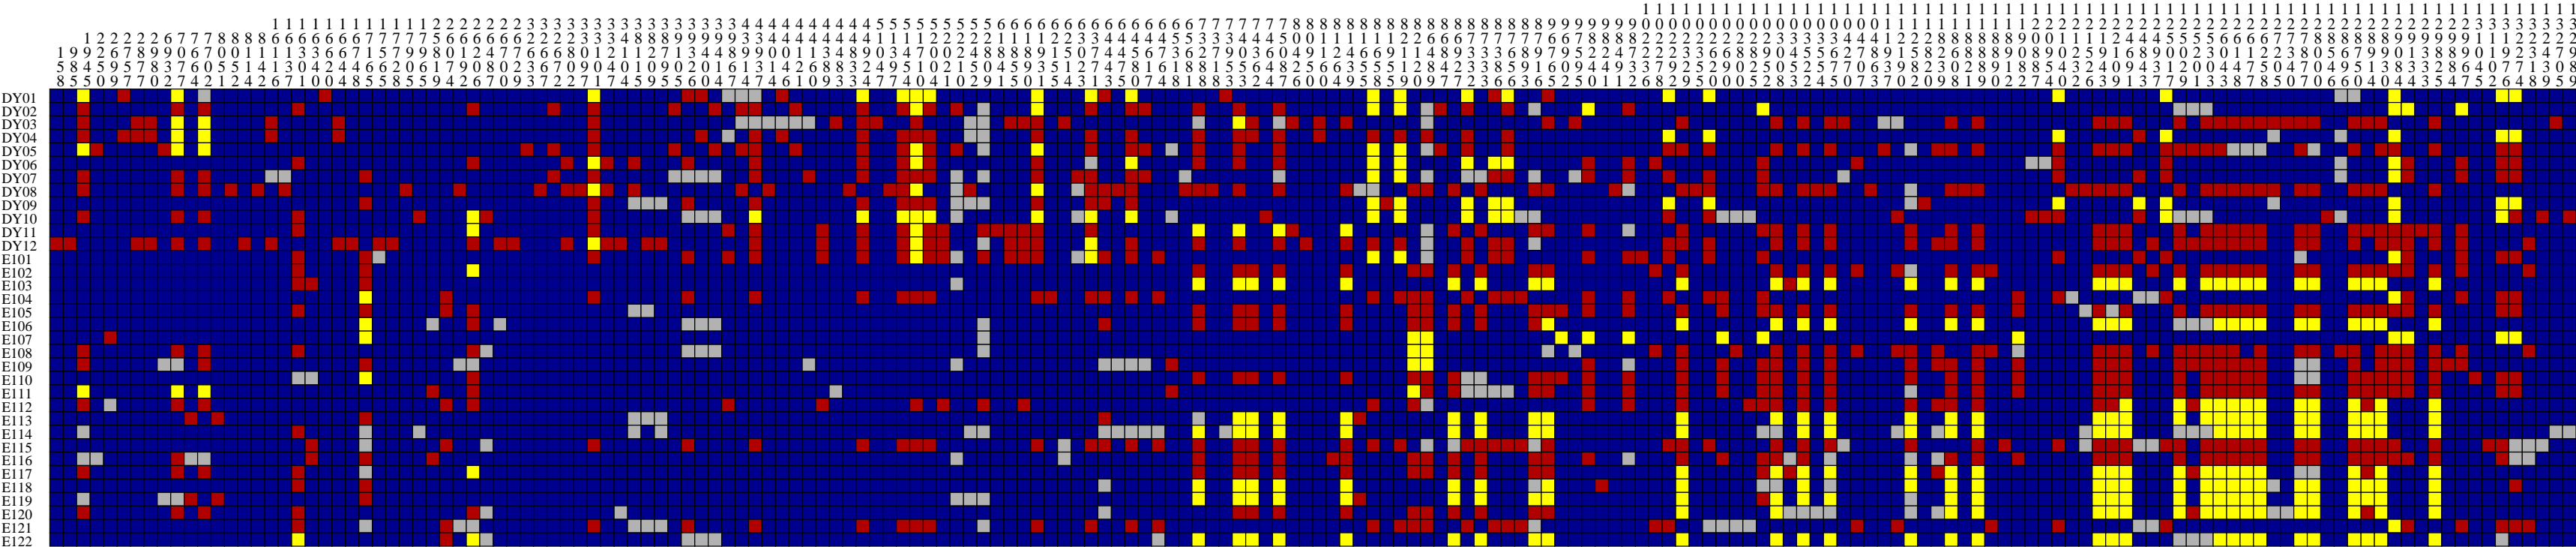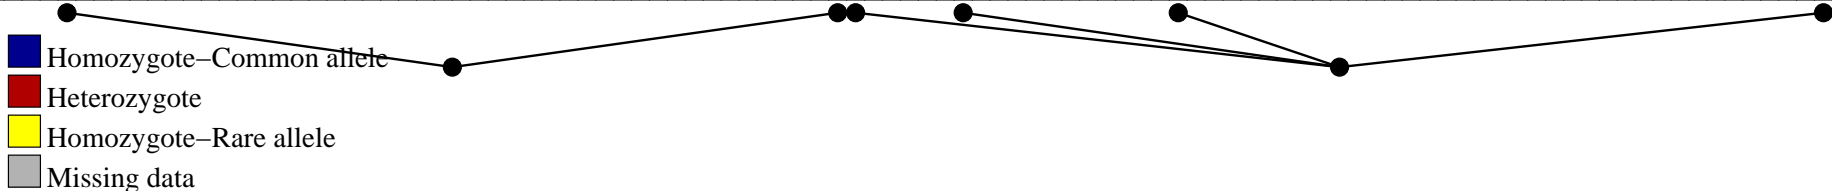

cyp1a2, p-value: 0.5376

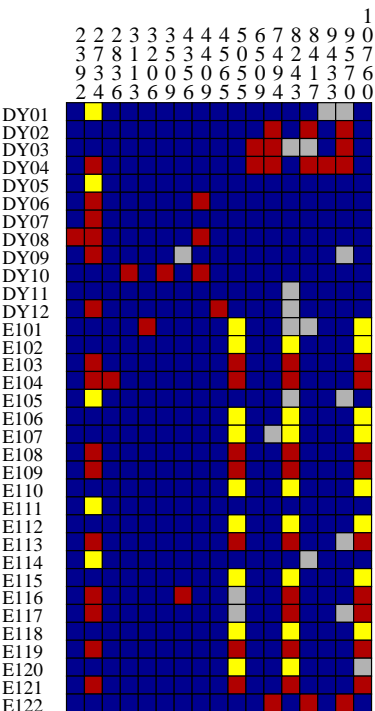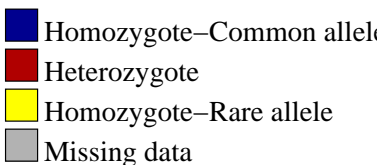

cyp2b6, p-value: 0.2506

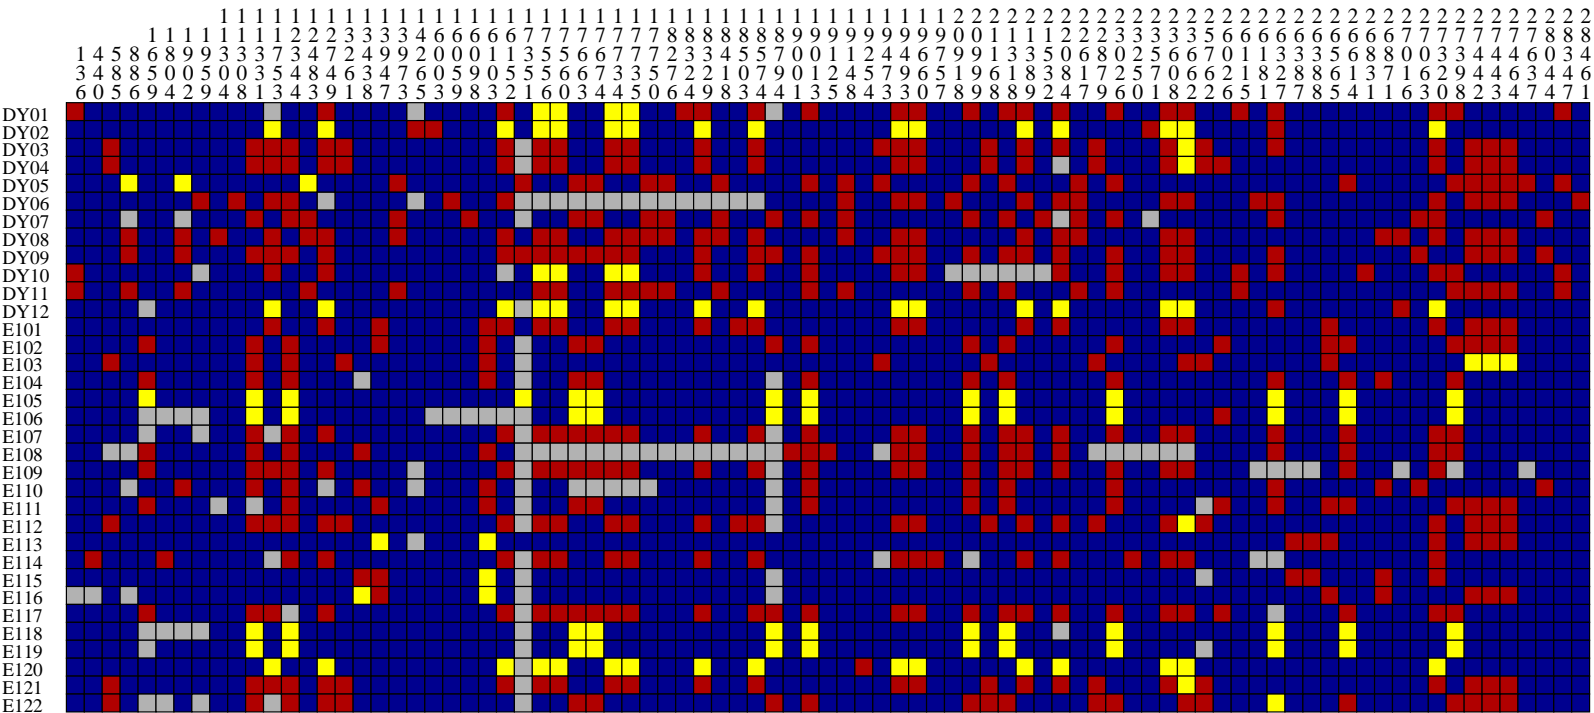

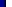 Homozygote–Common allele  
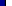 Heterozygote  
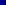 Homozygote–Rare allele  
 Missing data

[illegible]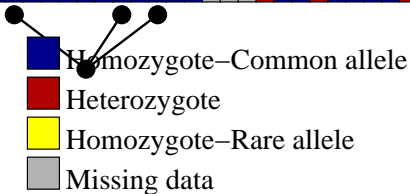

dclre1b, p-value: 0.5894

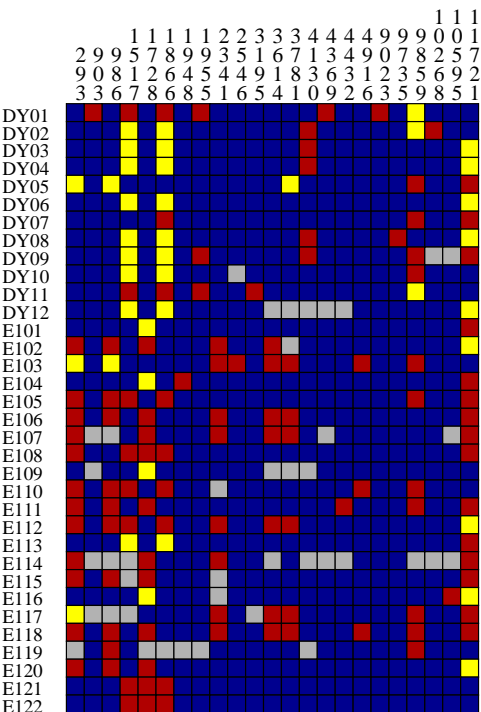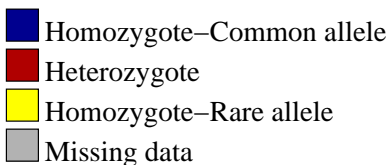

ddb1, p-value: 0.086

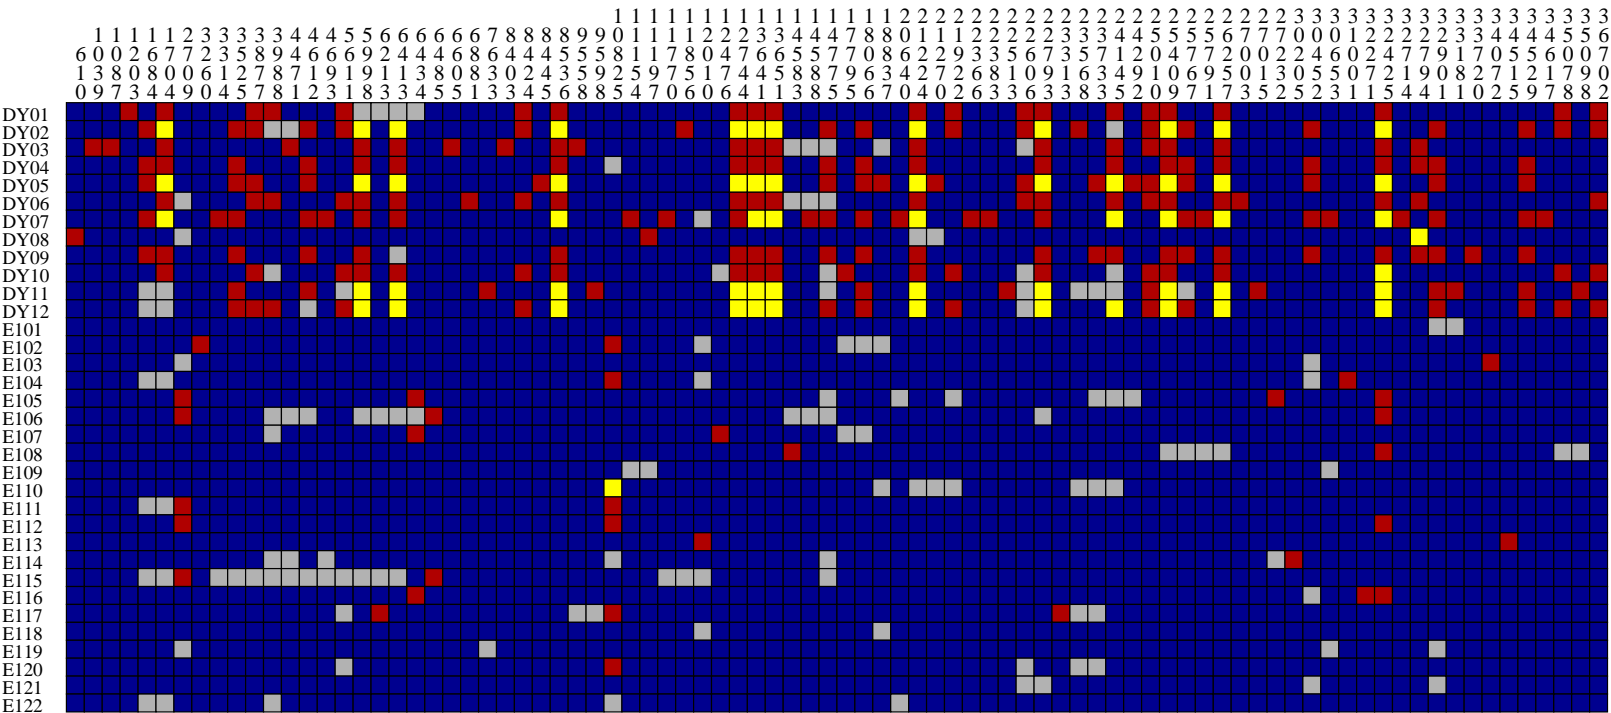

■ Homozygote–Common allele

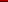 Heterozygote

■ Homozygote–Rare allele

Missing data

ddit3, p-value: 0.5

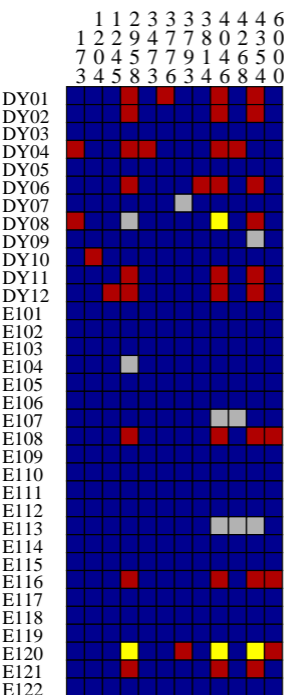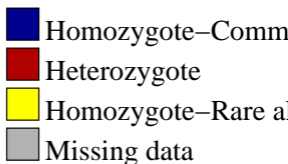

dut, p-value: 0.009

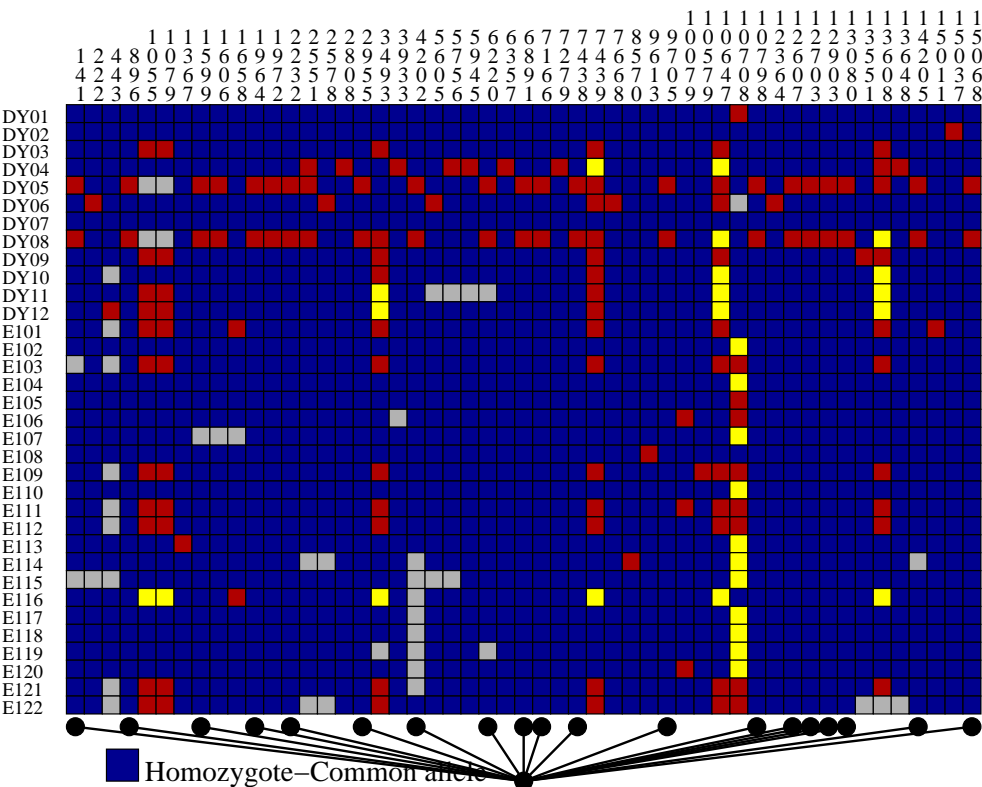

ece1, p-value: 0.8506

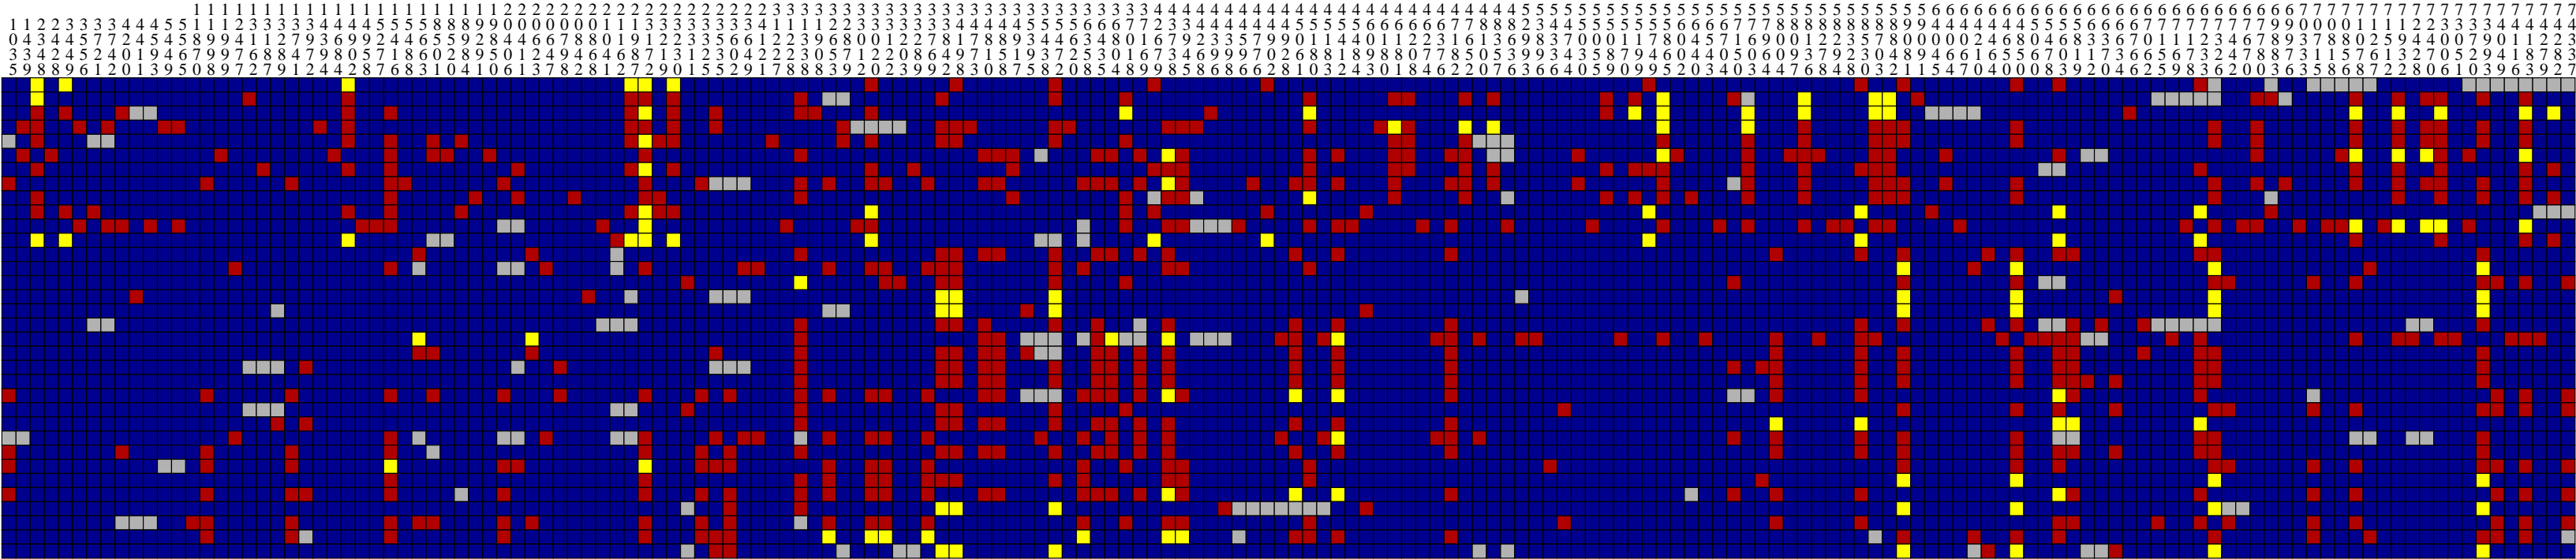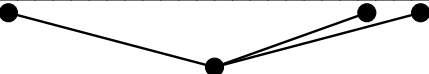

- Homozygote-Common allele
- Heterozygote
- Homozygote-Rare allele
- Missing data

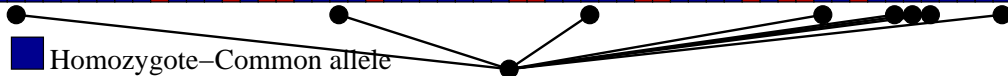

Homozygote–Rare allele

Missing data

[illegible]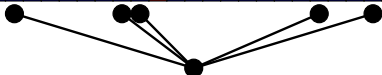

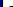 Homozygote–Common allele  
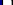 Heterozygote  
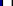 Homozygote–Rare allele  
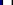 Missing data

[illegible]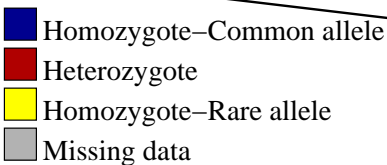

fancf, p-value: 0.0778

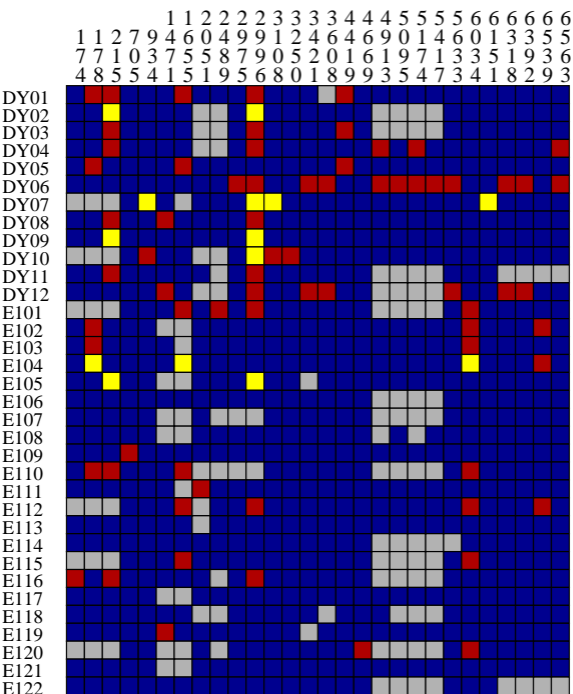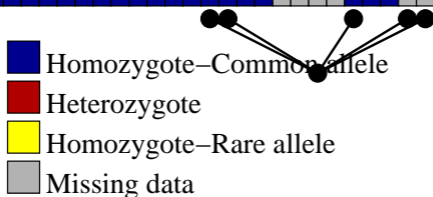

fbp1, p-value: 0.1952

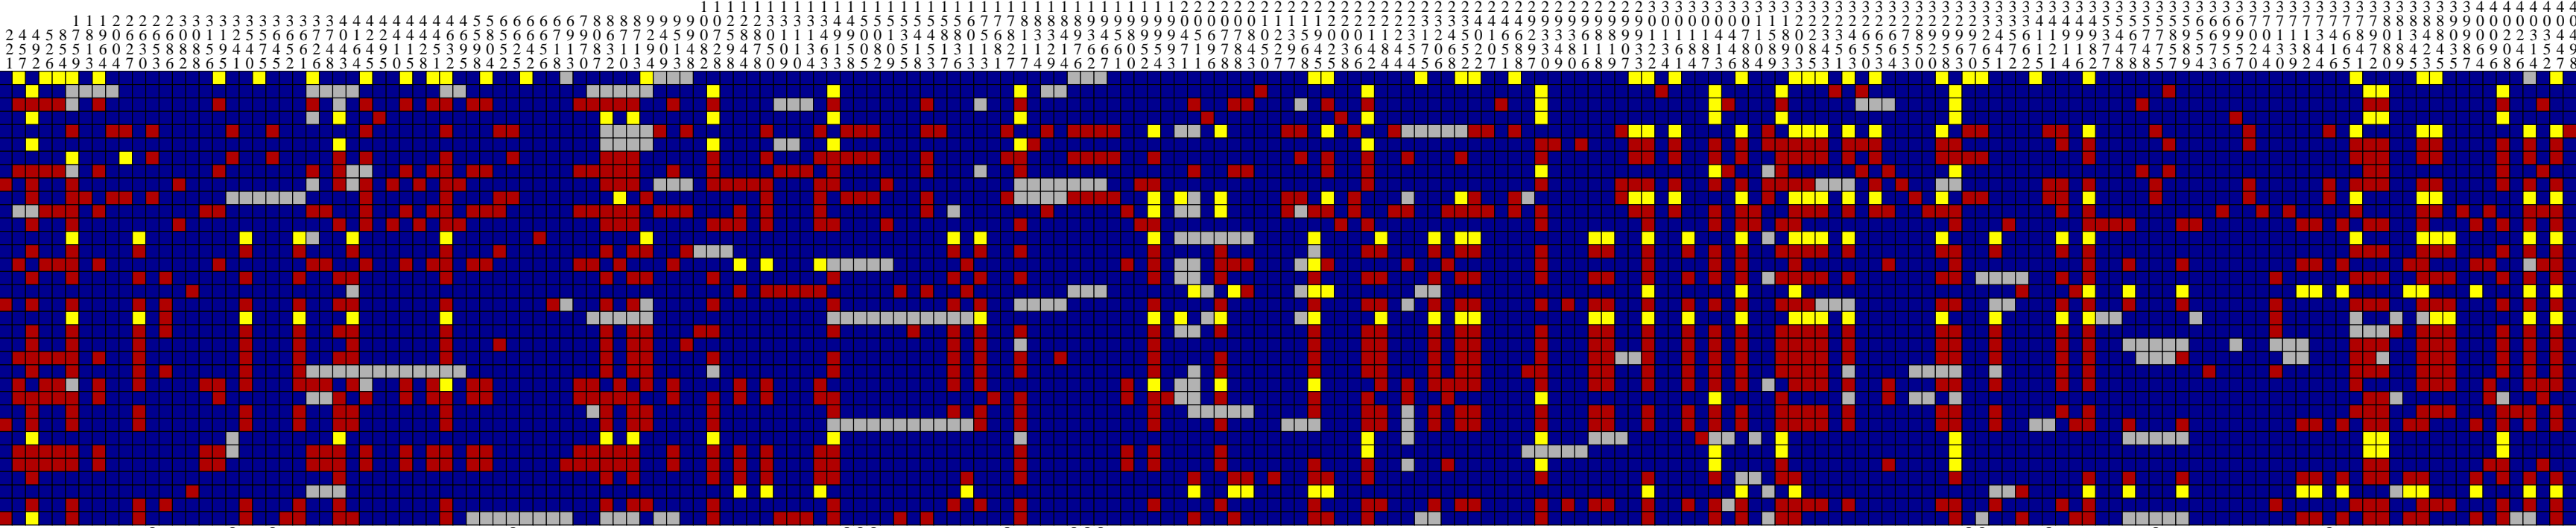

- Homozygote-Common allele
- Heterozygote
- Homozygote-Rare allele
- Missing data

fdxr, p-value: 0.1546

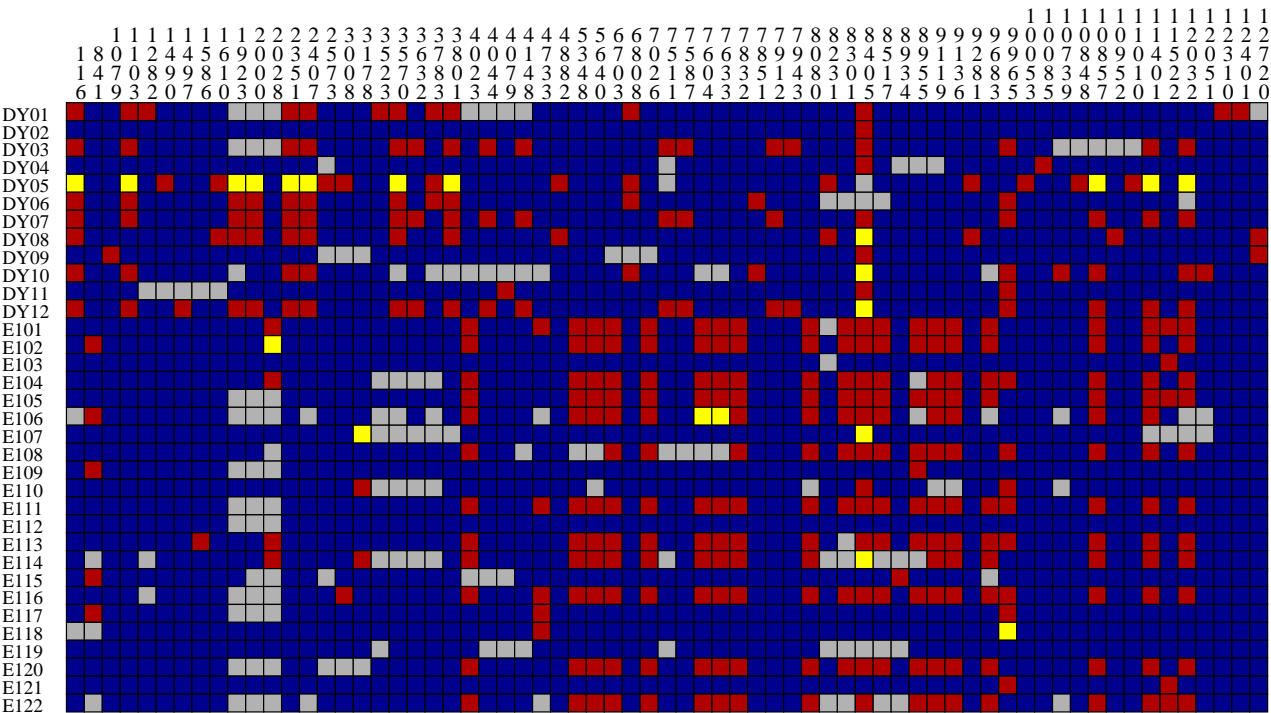

■ Homozygote-Common allele

 Heterozygote

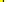 Homozygote–Rare allele

■ Missing data

fgf5, p-value: 0.5746

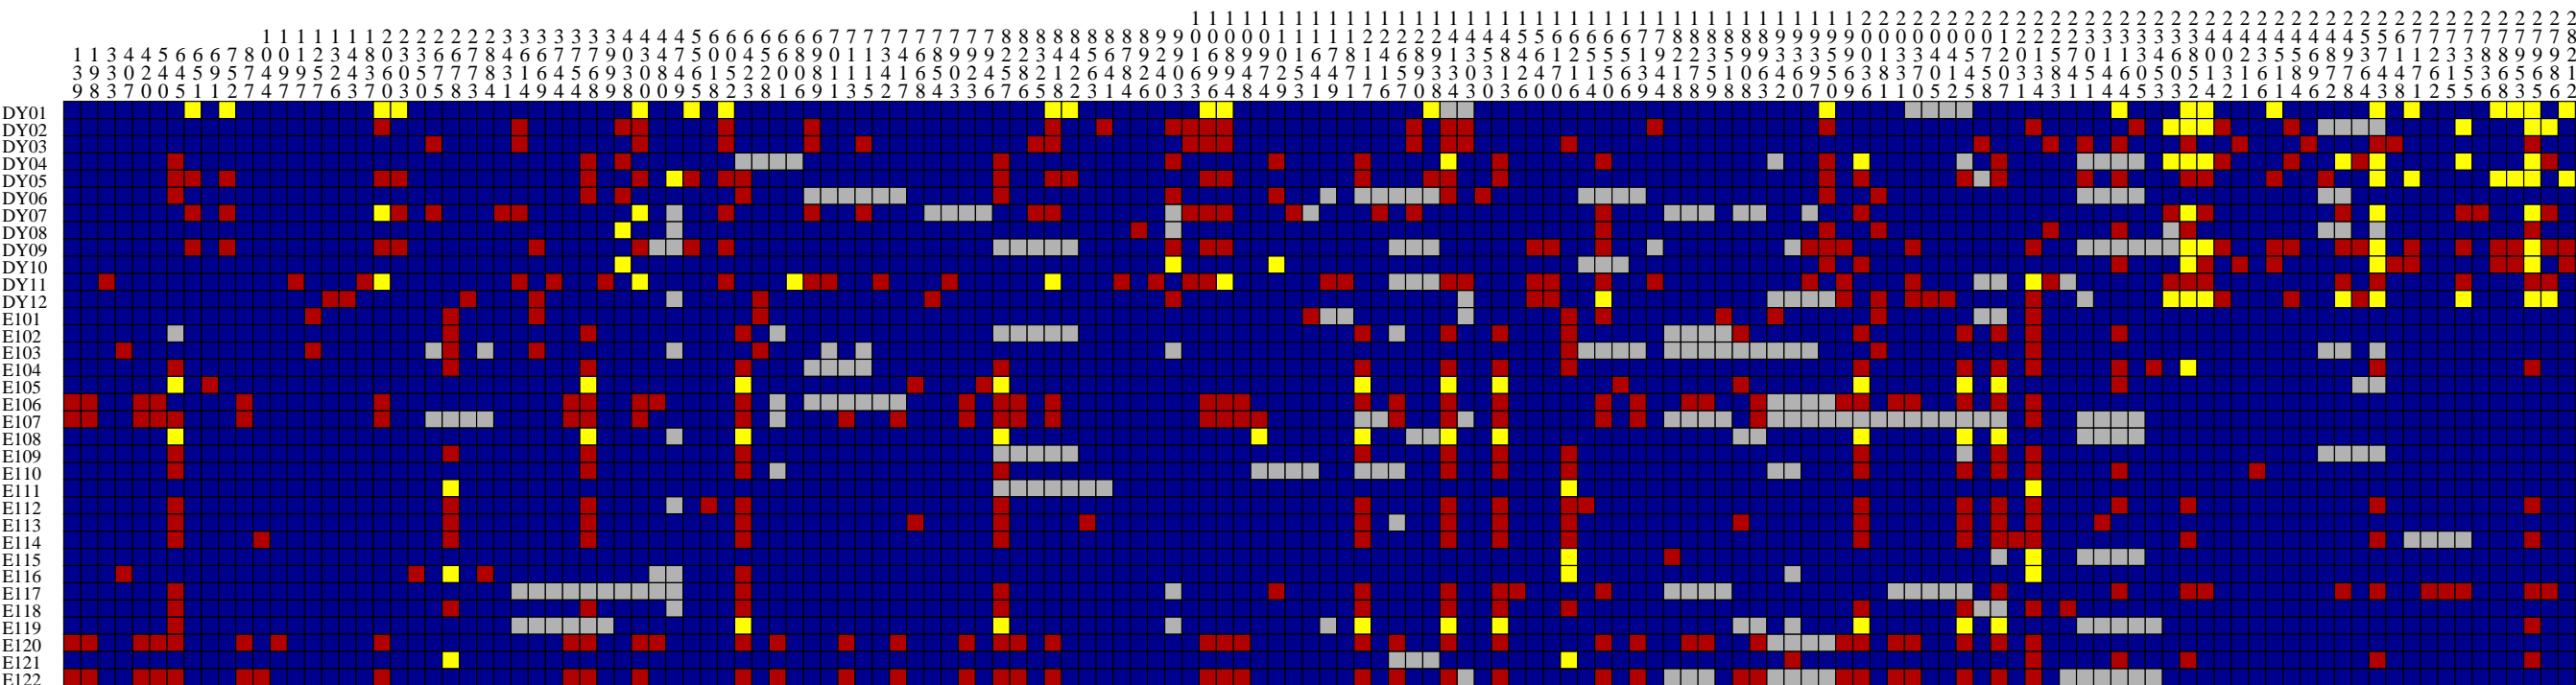

■ Homozygote–Common allele

**Heterozygote**

■ Homozygote–Rare allele

## Missing data

fmo2, p-value: 0.2464

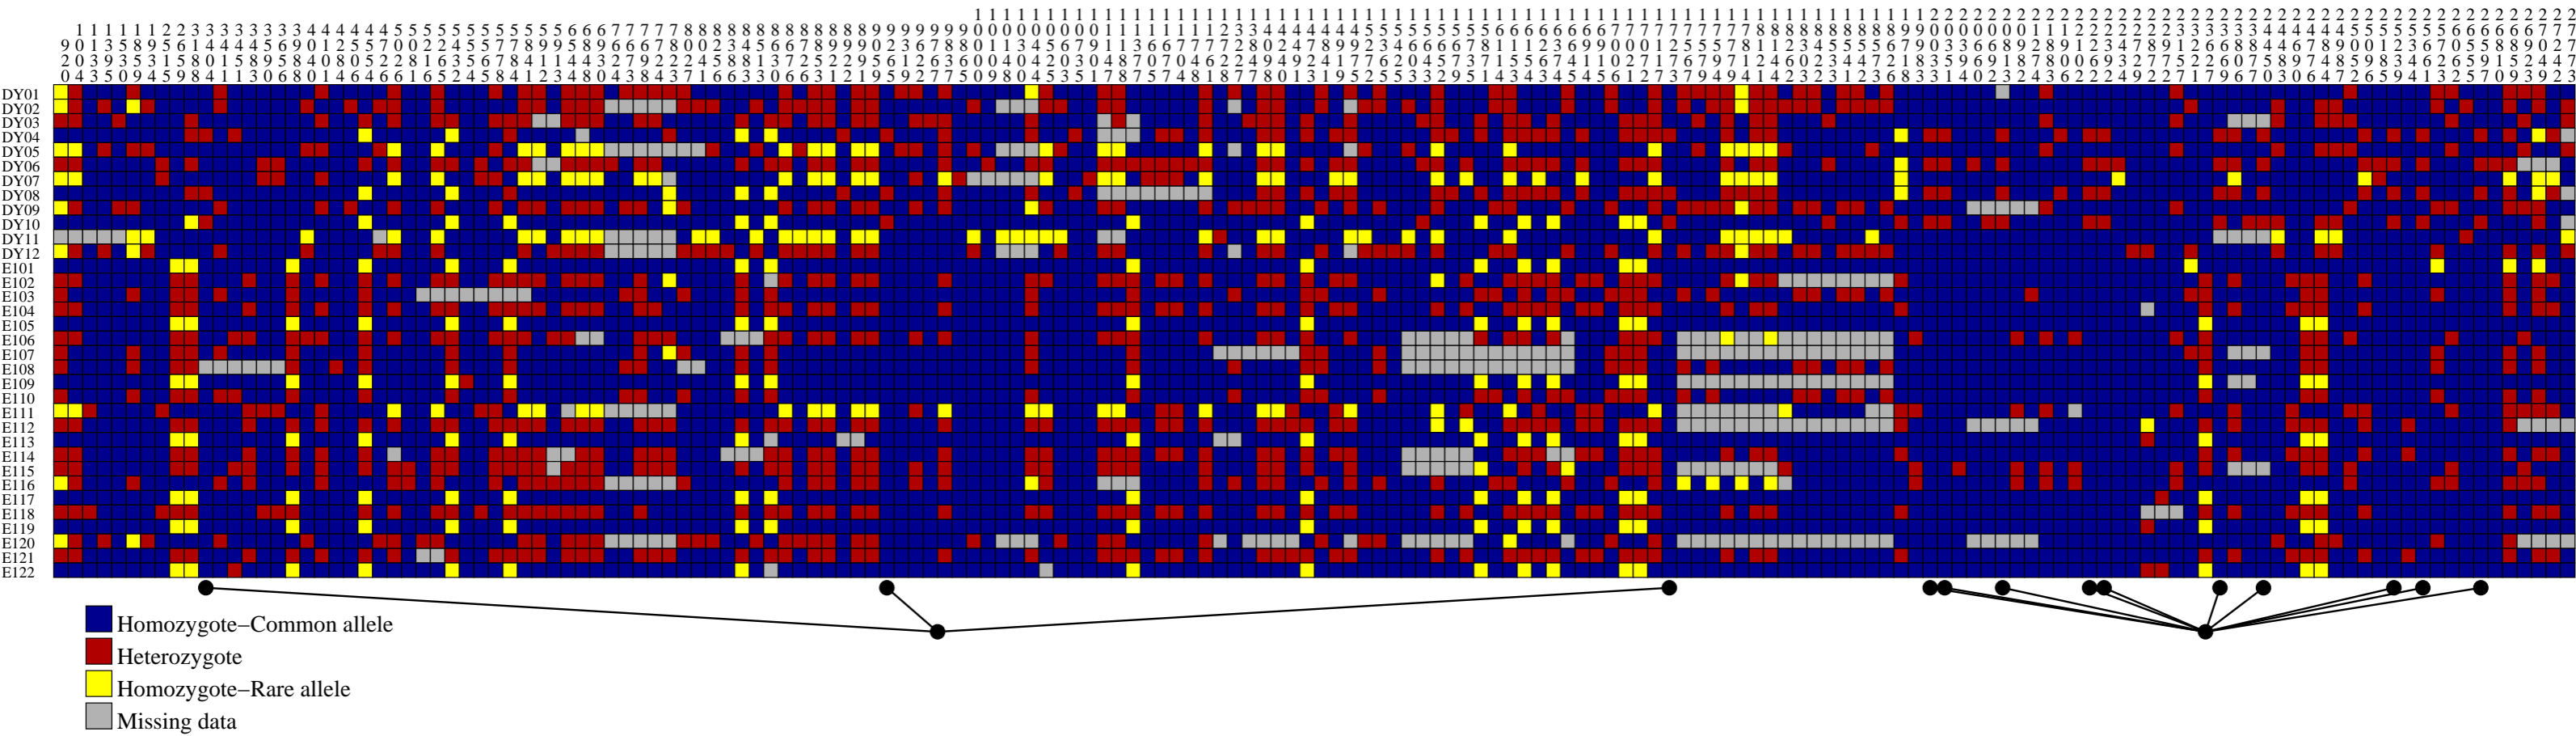



fmo4, p-value: 0.0532

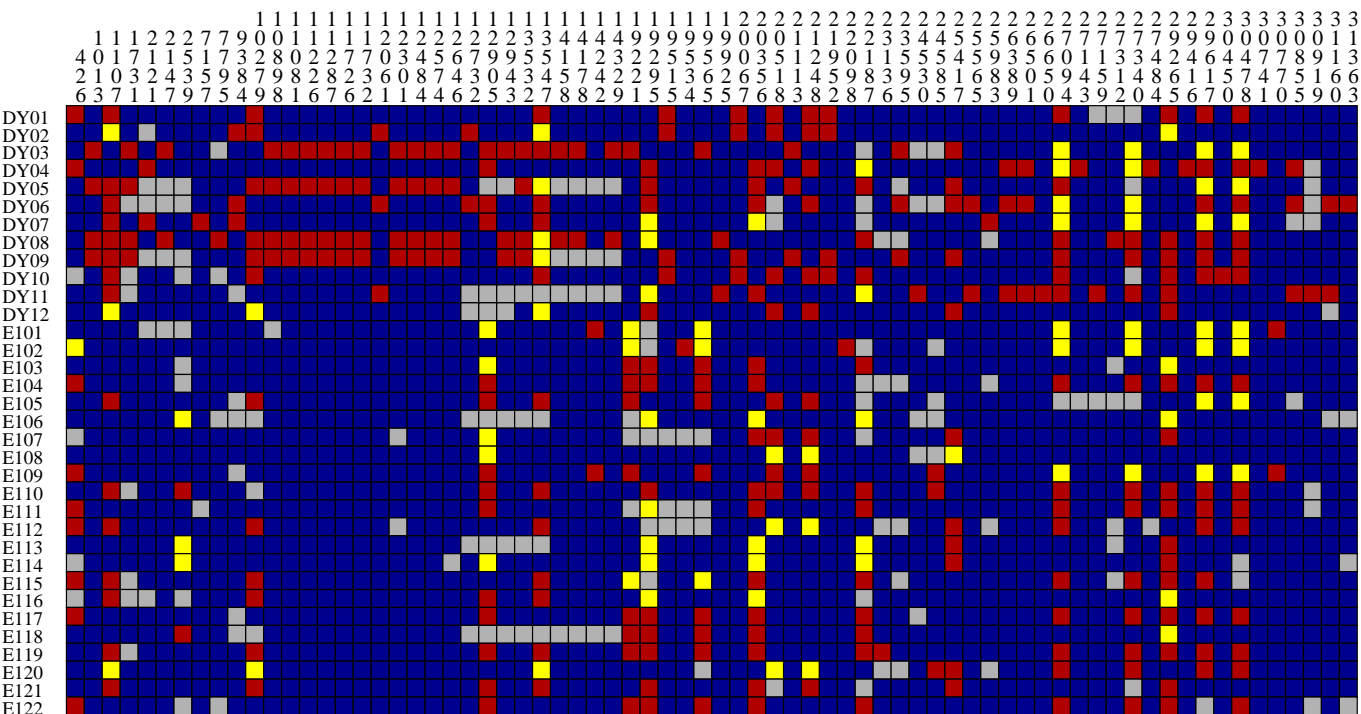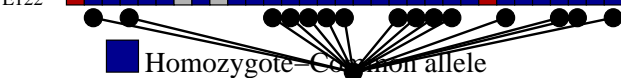

- Blue Homozygote-Common allele
- Red Heterozygote
- Yellow Homozygote-Rare allele
- Grey Missing data

[illegible]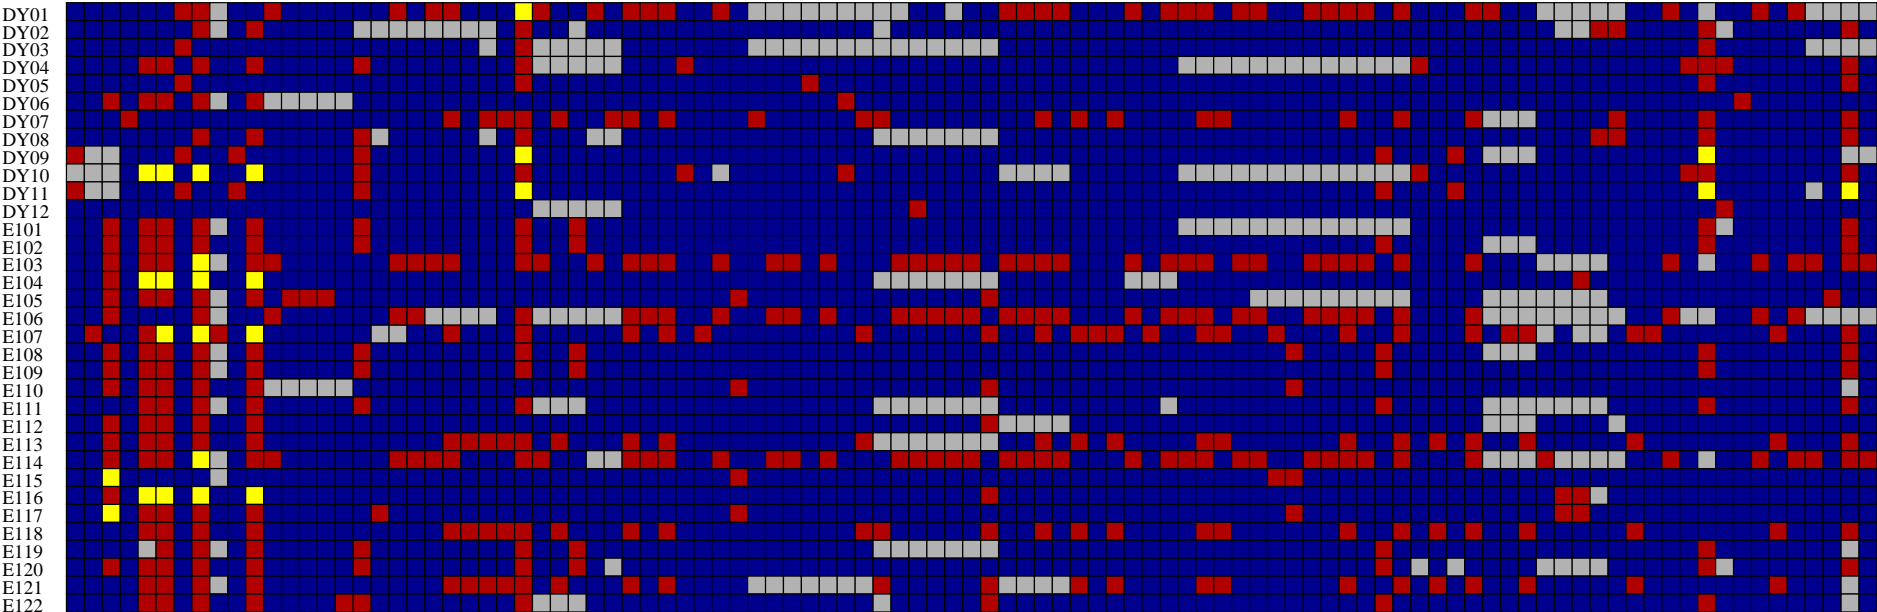

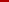 Heterozygote

Missing data

fosb, p-value: 0.2166

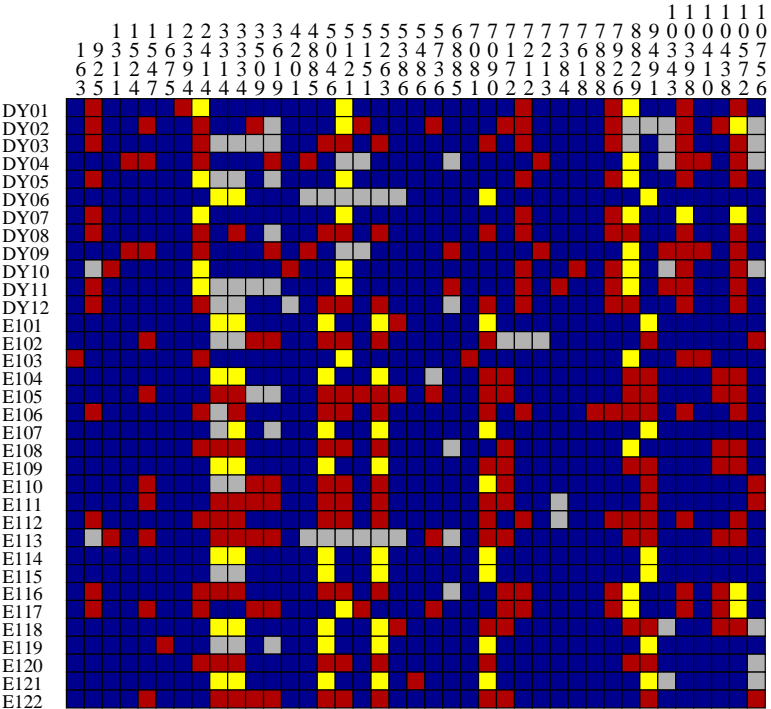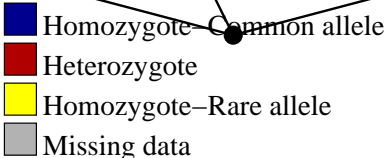

[illegible]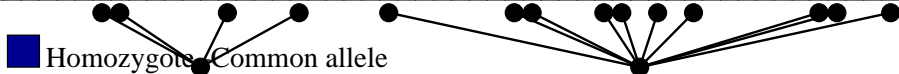

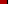 Heterozygote  
 Homozygote–Rare allele  
 Missing data

gab1, p-value: 0.2816

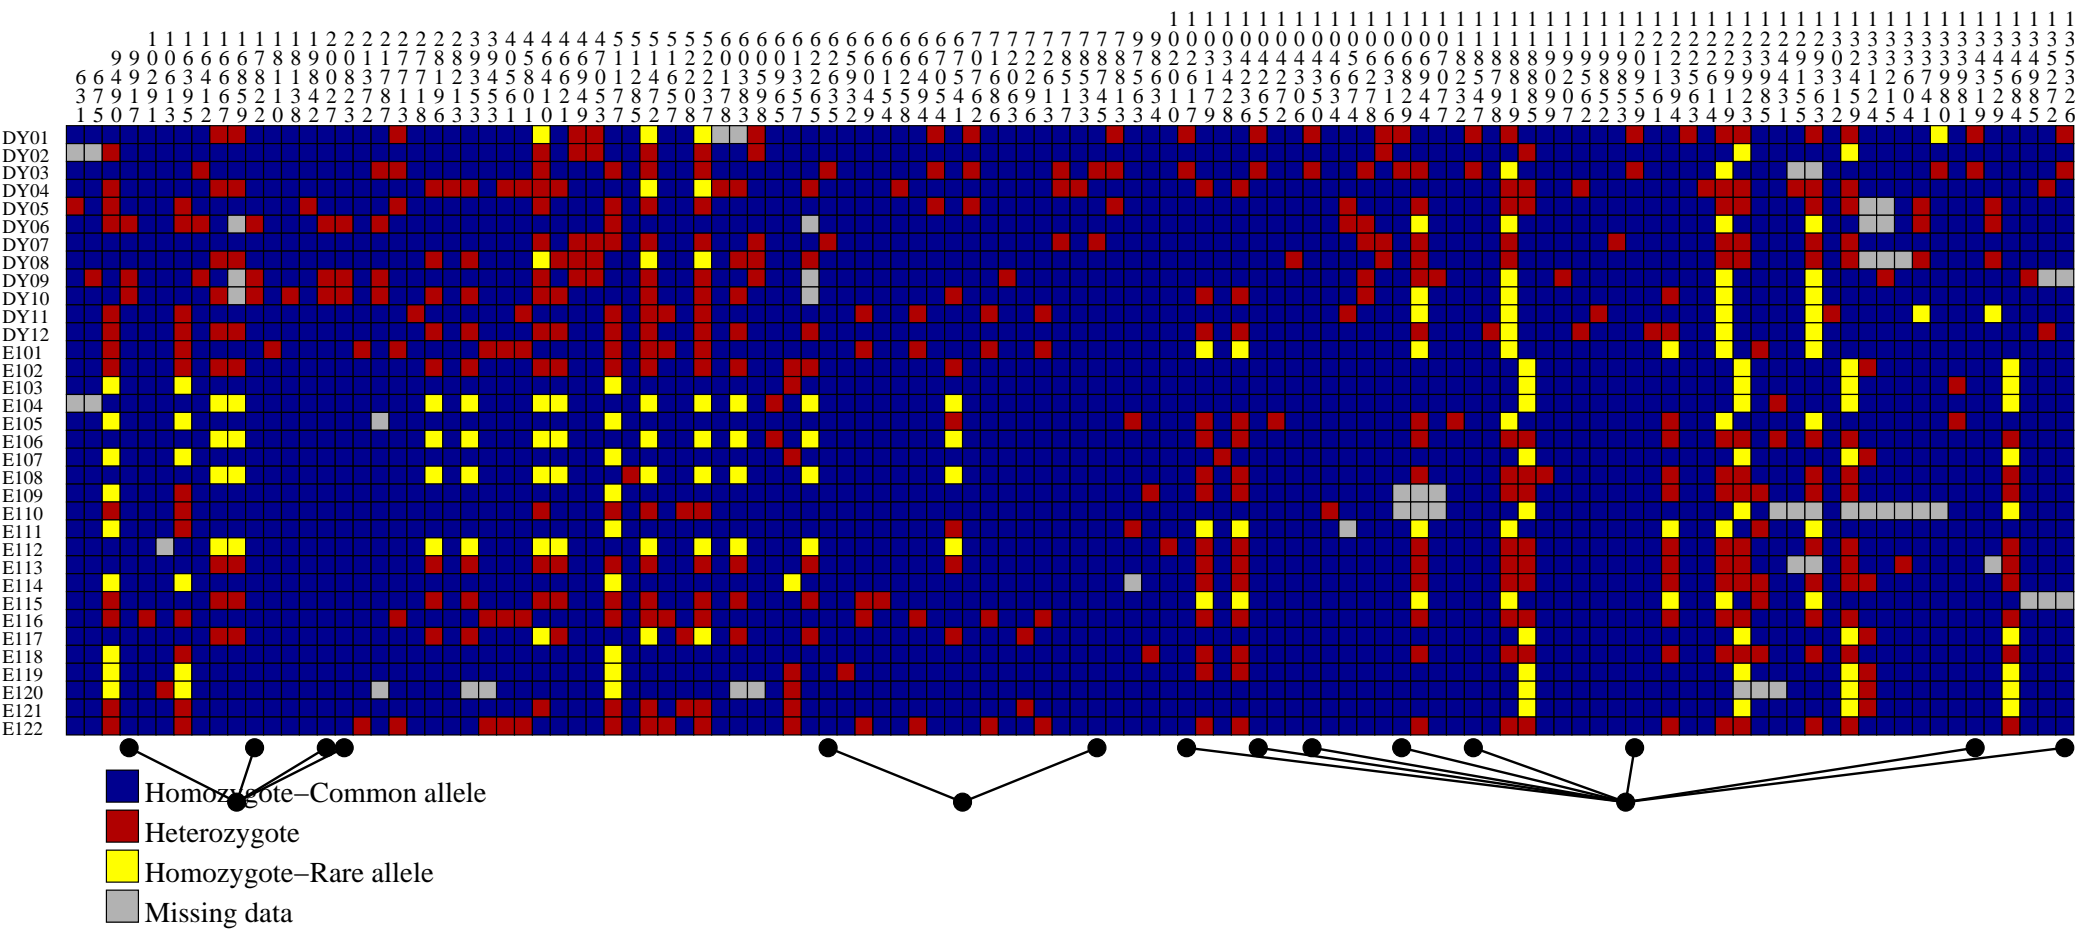

glrx2, p-value: 0.3724

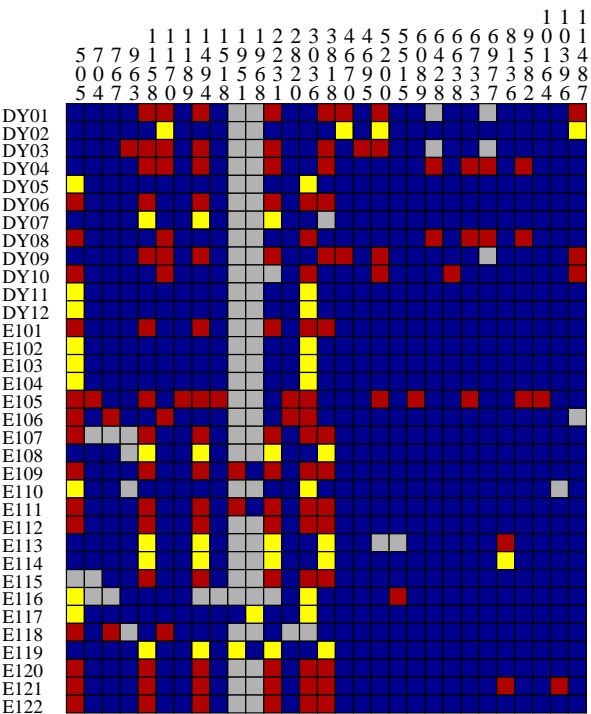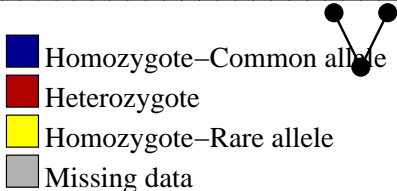

[illegible]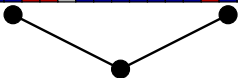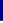

gpx5, p-value: 0.2684

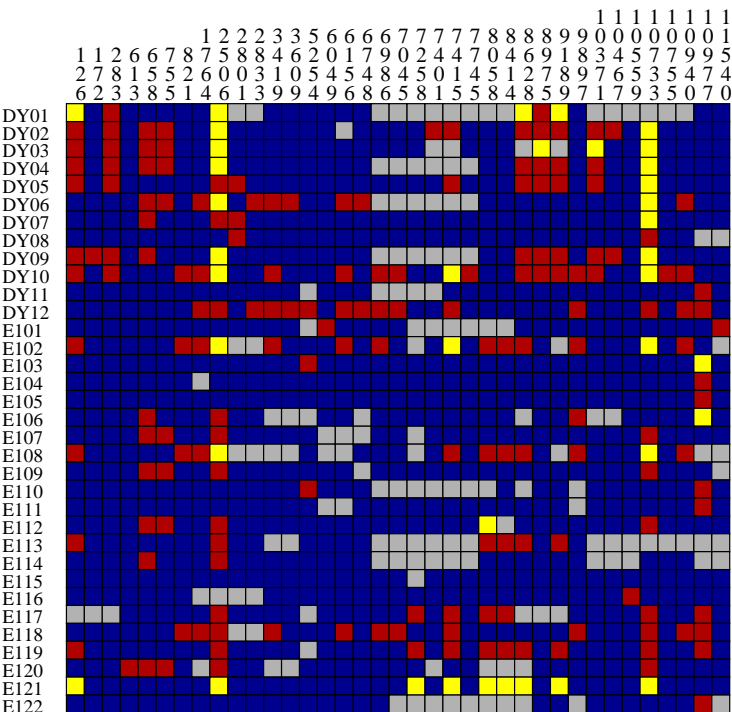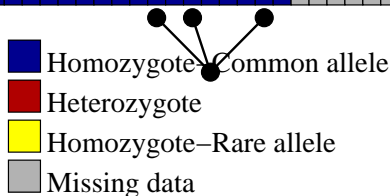



gpx7, p-value: 0.7208

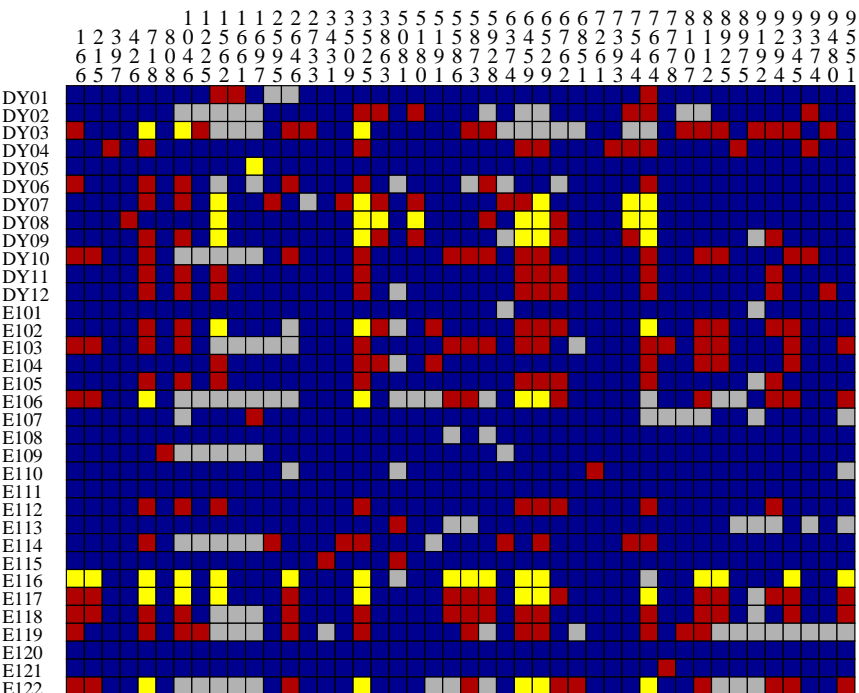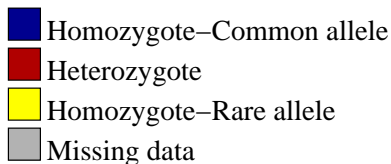

gss, p-value: 0.6928

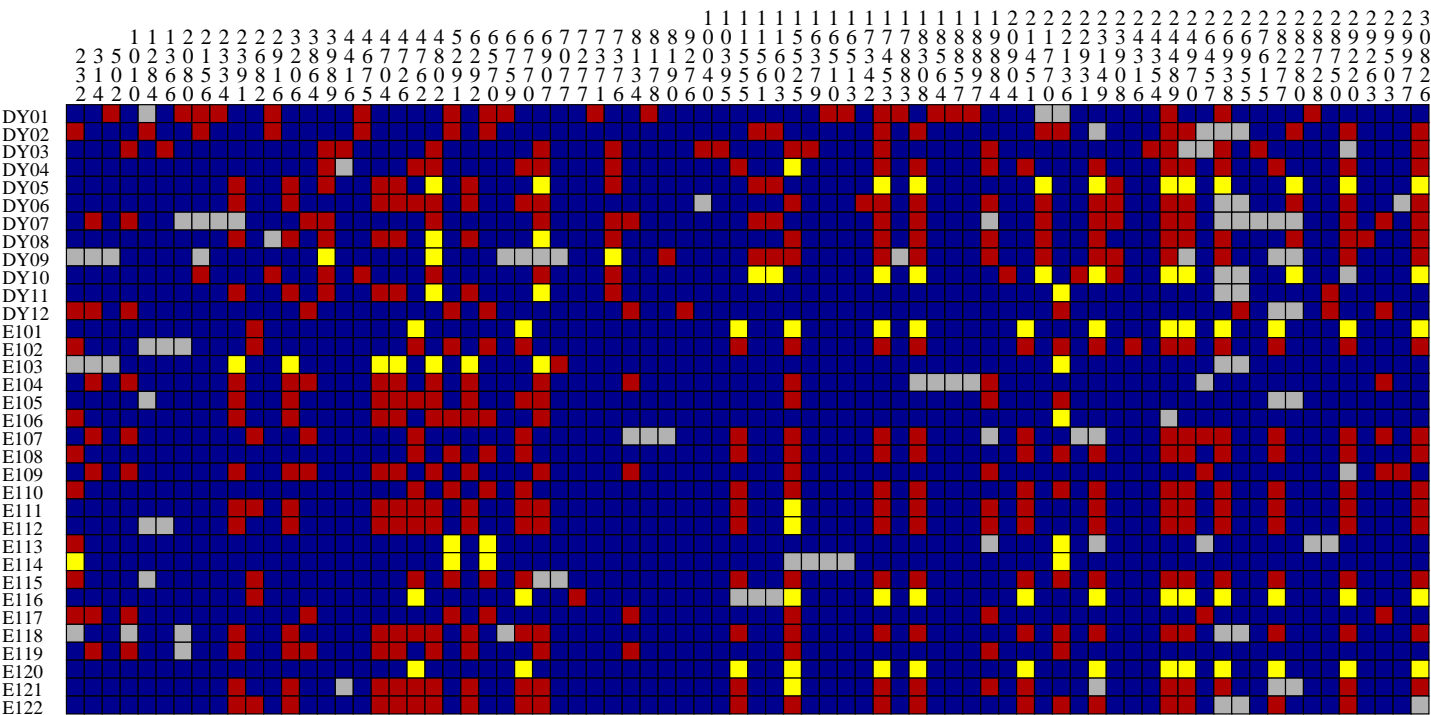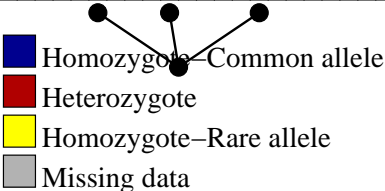

gsta4, p-value: 0.2922

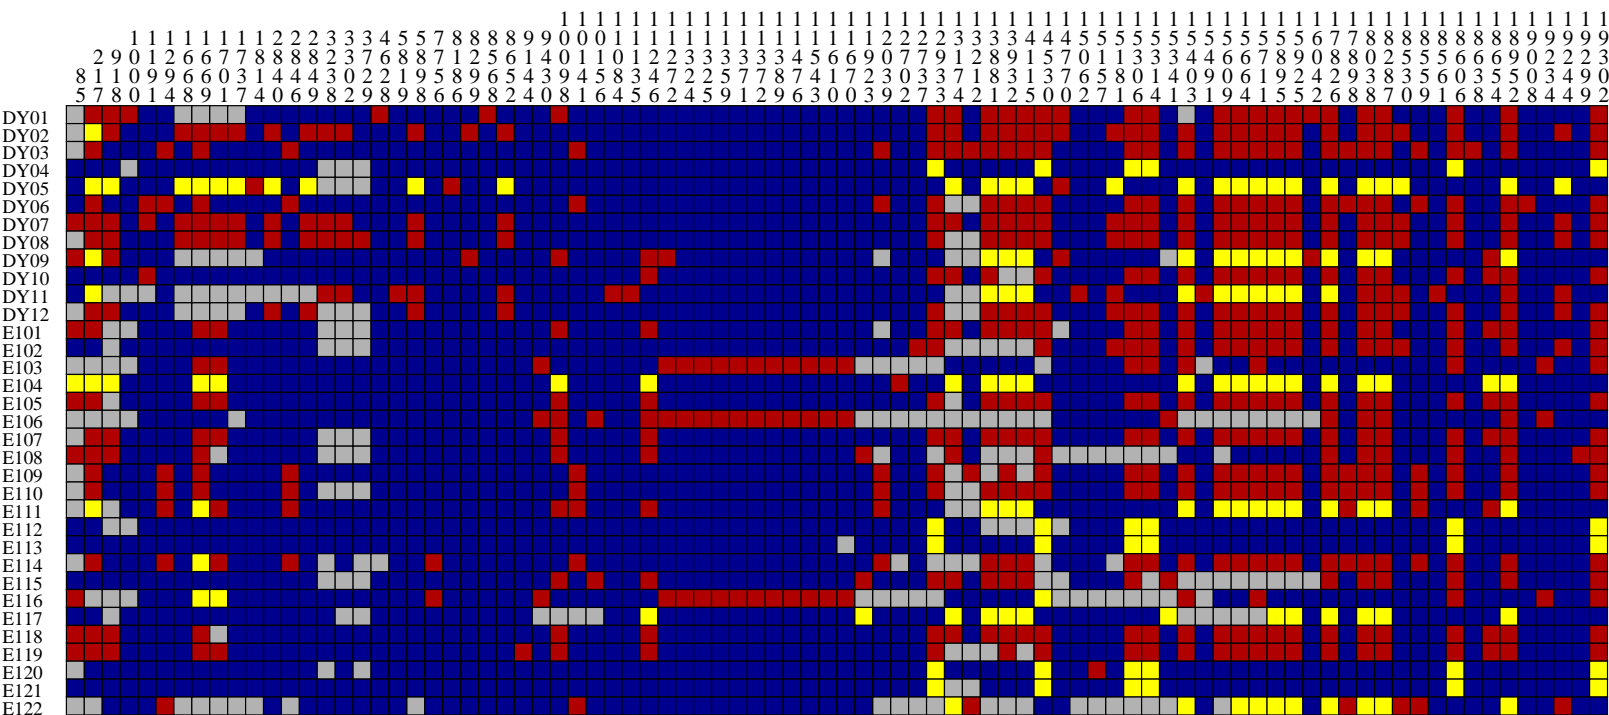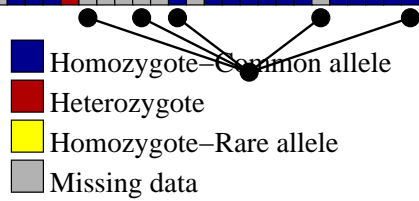

h2afx, p-value: 0.169

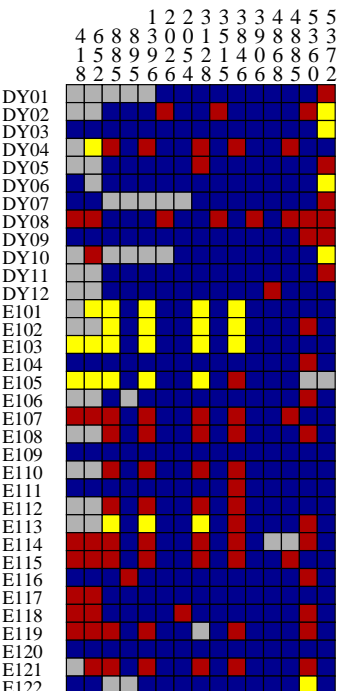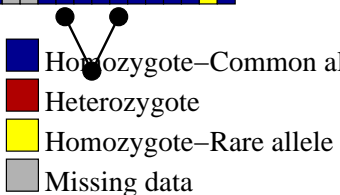

ifna1, p-value: 0.2062

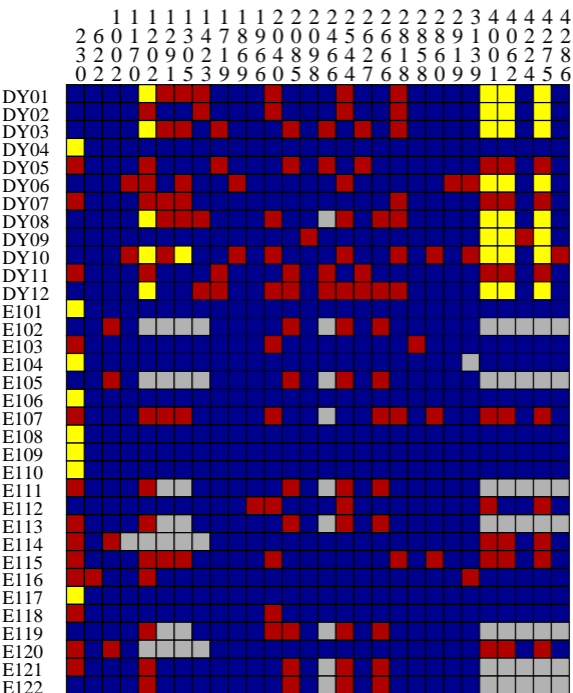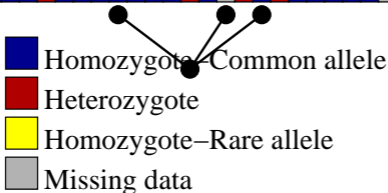

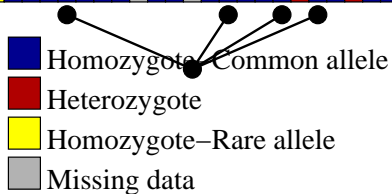

lcmt2, p-value: 0.535

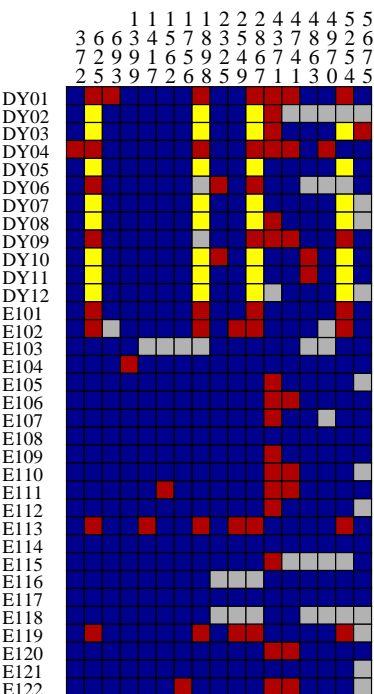

mad2l2, p-value: 0.3256

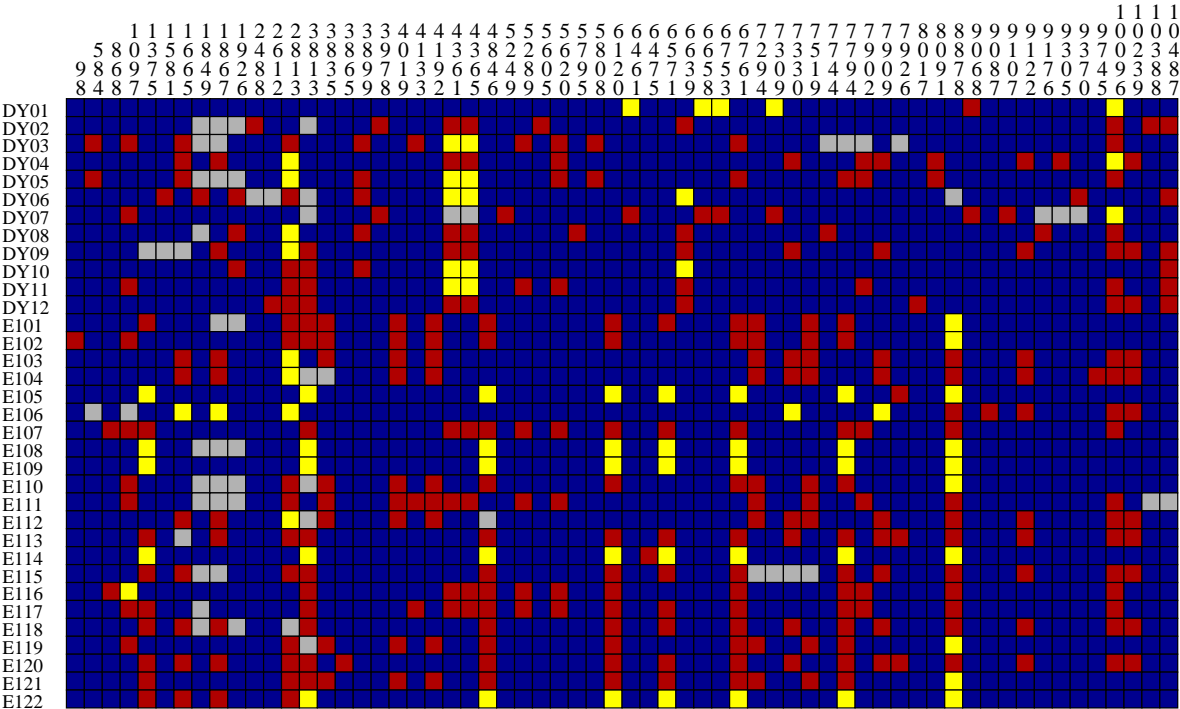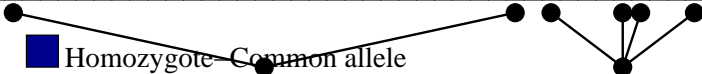

- Homozygote-Common allele
- Heterozygote
- Homozygote-Rare allele
- Missing data

map2k4, p-value: 0.0558

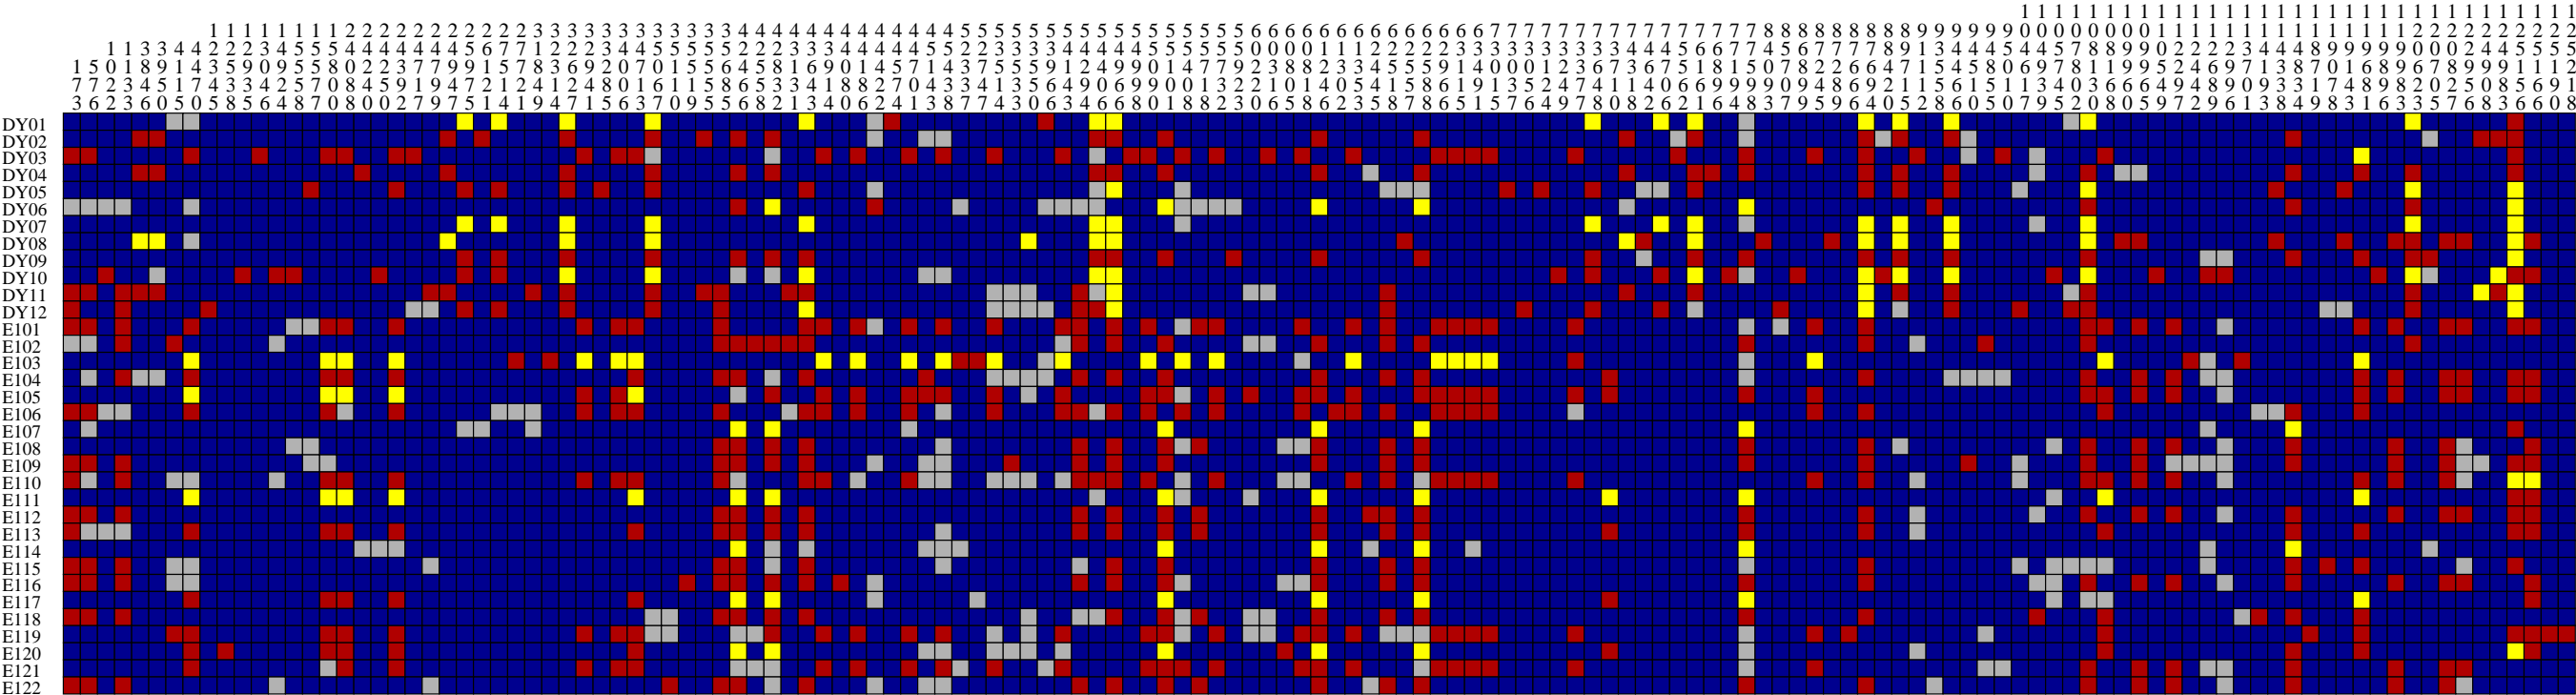

- Homozygote-Common allele
- Heterozygote
- Homozygote-Rare allele
- Missing data

mapk9, p-value: 0.3838

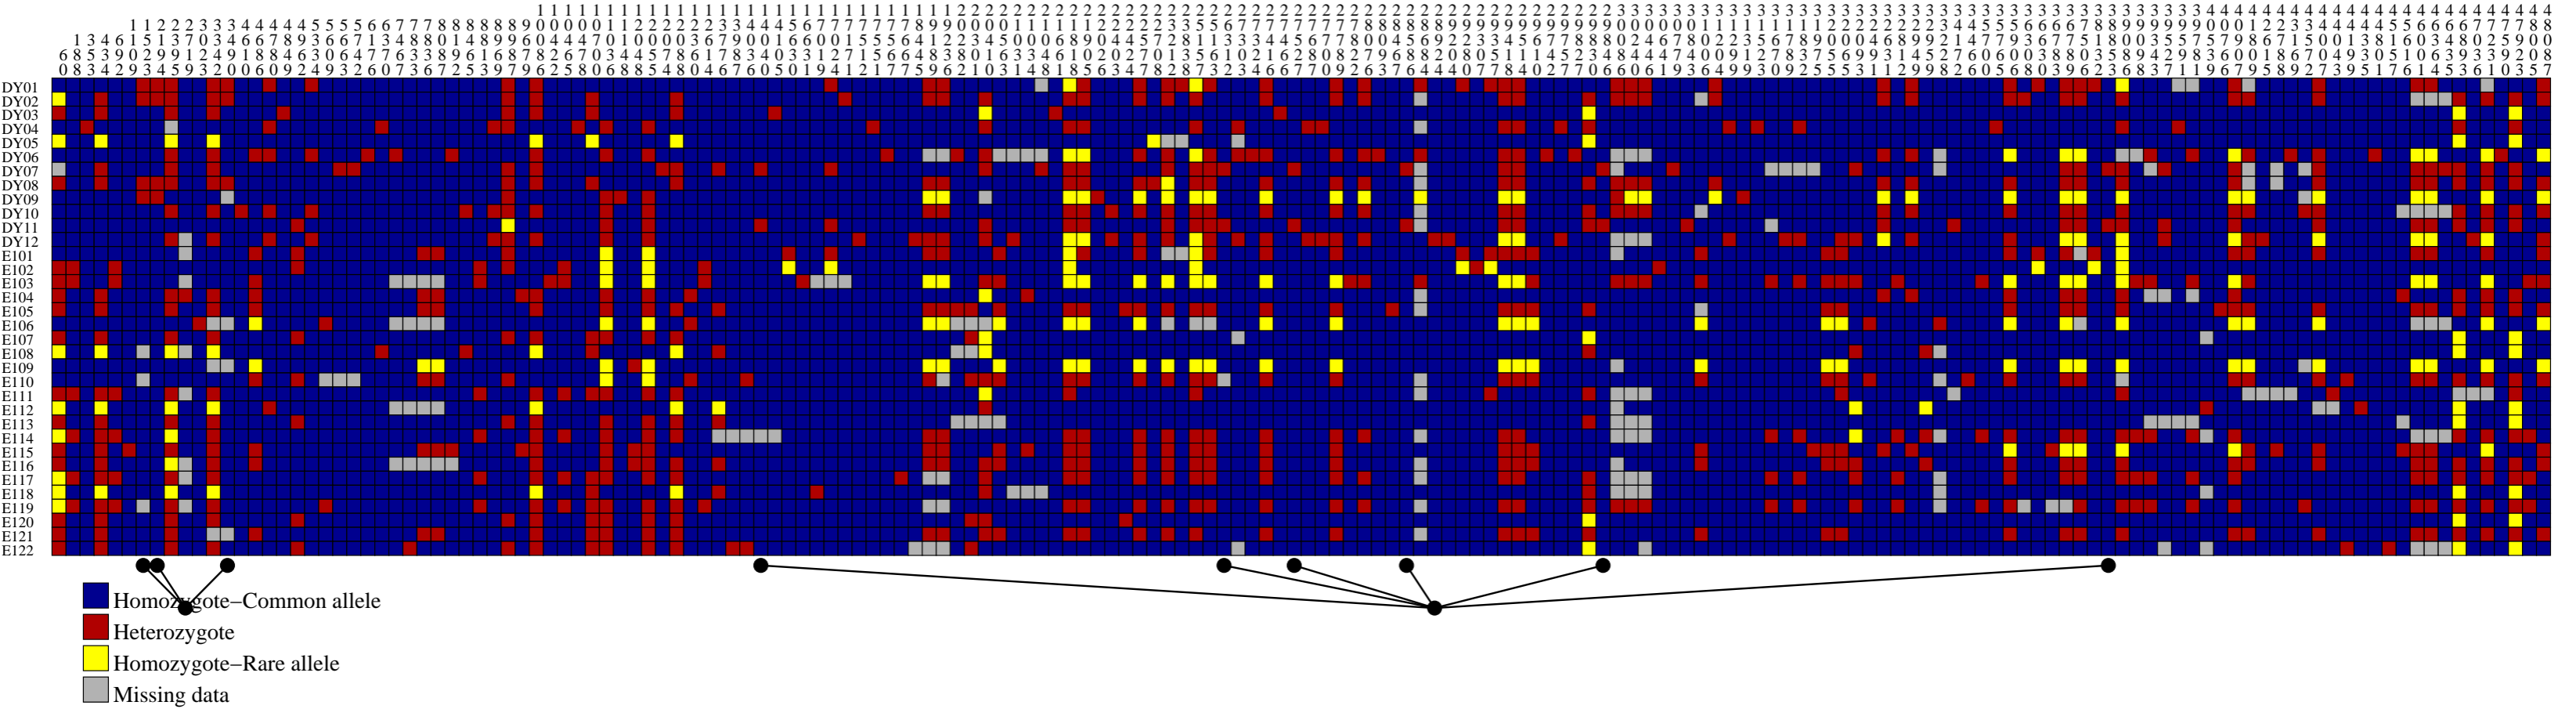

[illegible]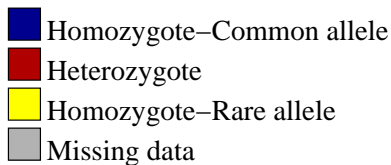

mcl1, p-value: 0.3392

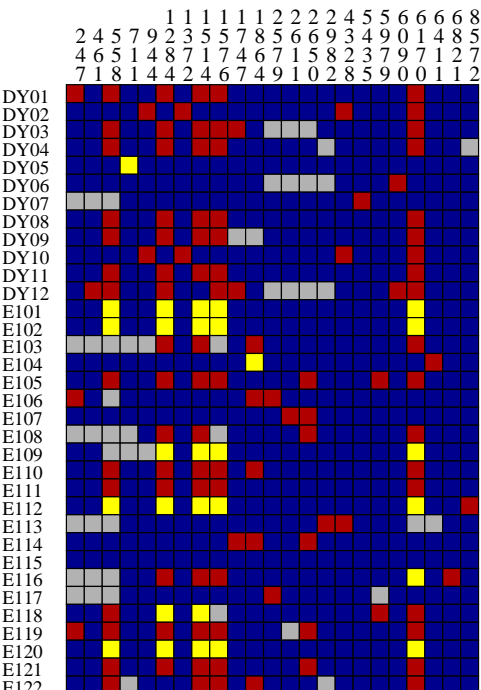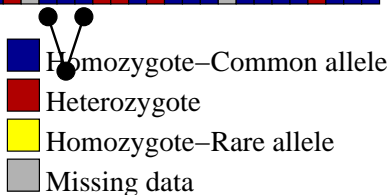

mlh3, p-value: 0.1674

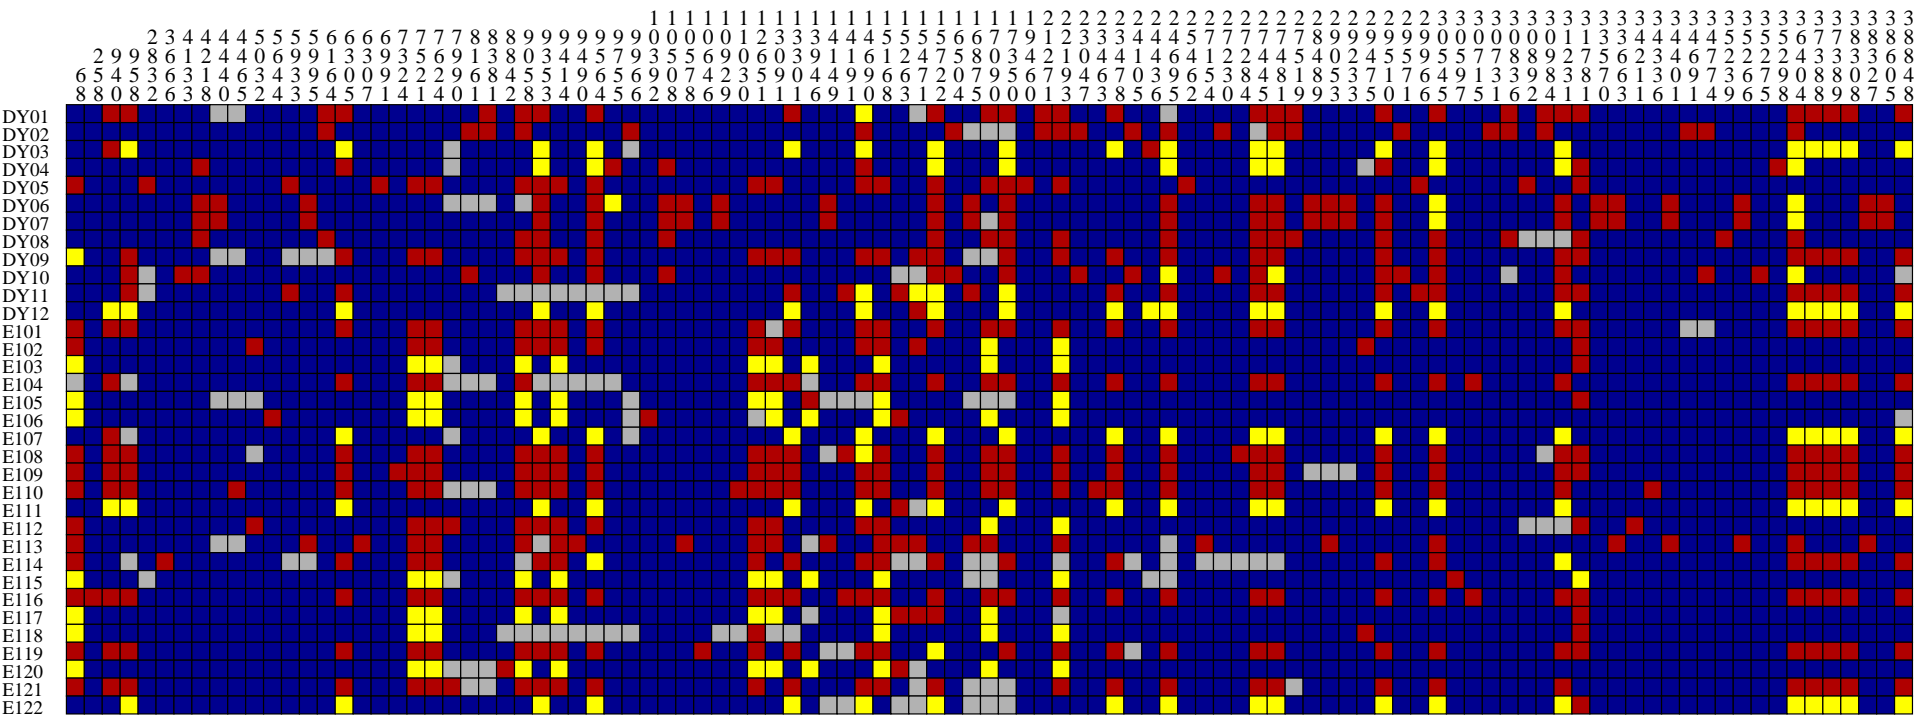

- Homozygote-Common allele
- Heterozygote
- Homozygote-Rare allele
- Missing data

1 1 1 1 1 1 1 1 1 1 1 1 1 1 1 1

1 1 1 2 2 2 3 3 3 3 3 3 3 4 4 4 4 4 4 5 7 7 7 7 7 7 8 8 8 8 8 8 8 9 9 9 0 0 0 0 0 0 1 1 1 1 1 2 2 2 2 3 4 5

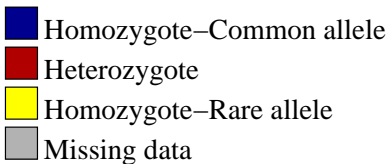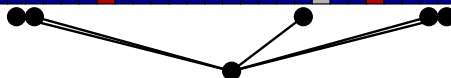

mmp12, p-value: 0.2398

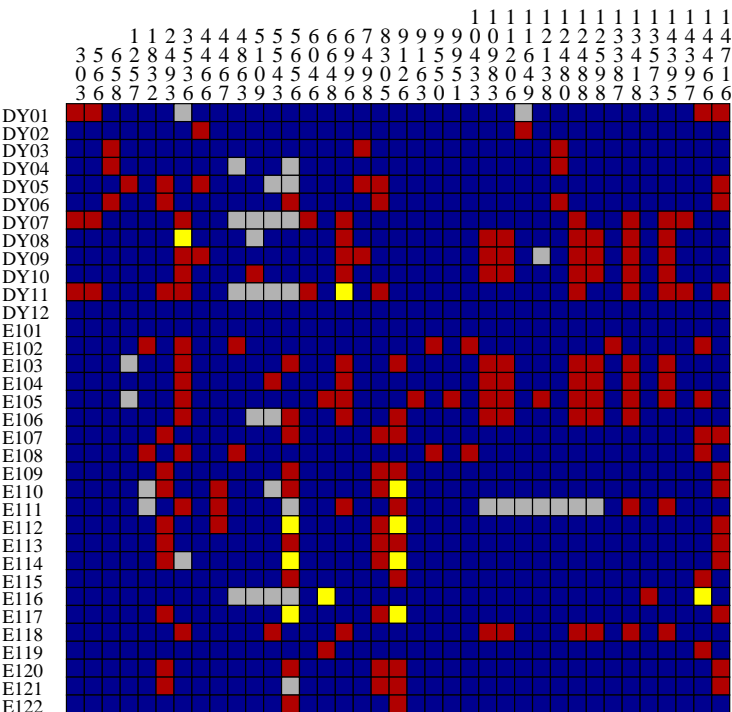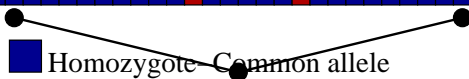

mmp16, p-value: 0.155

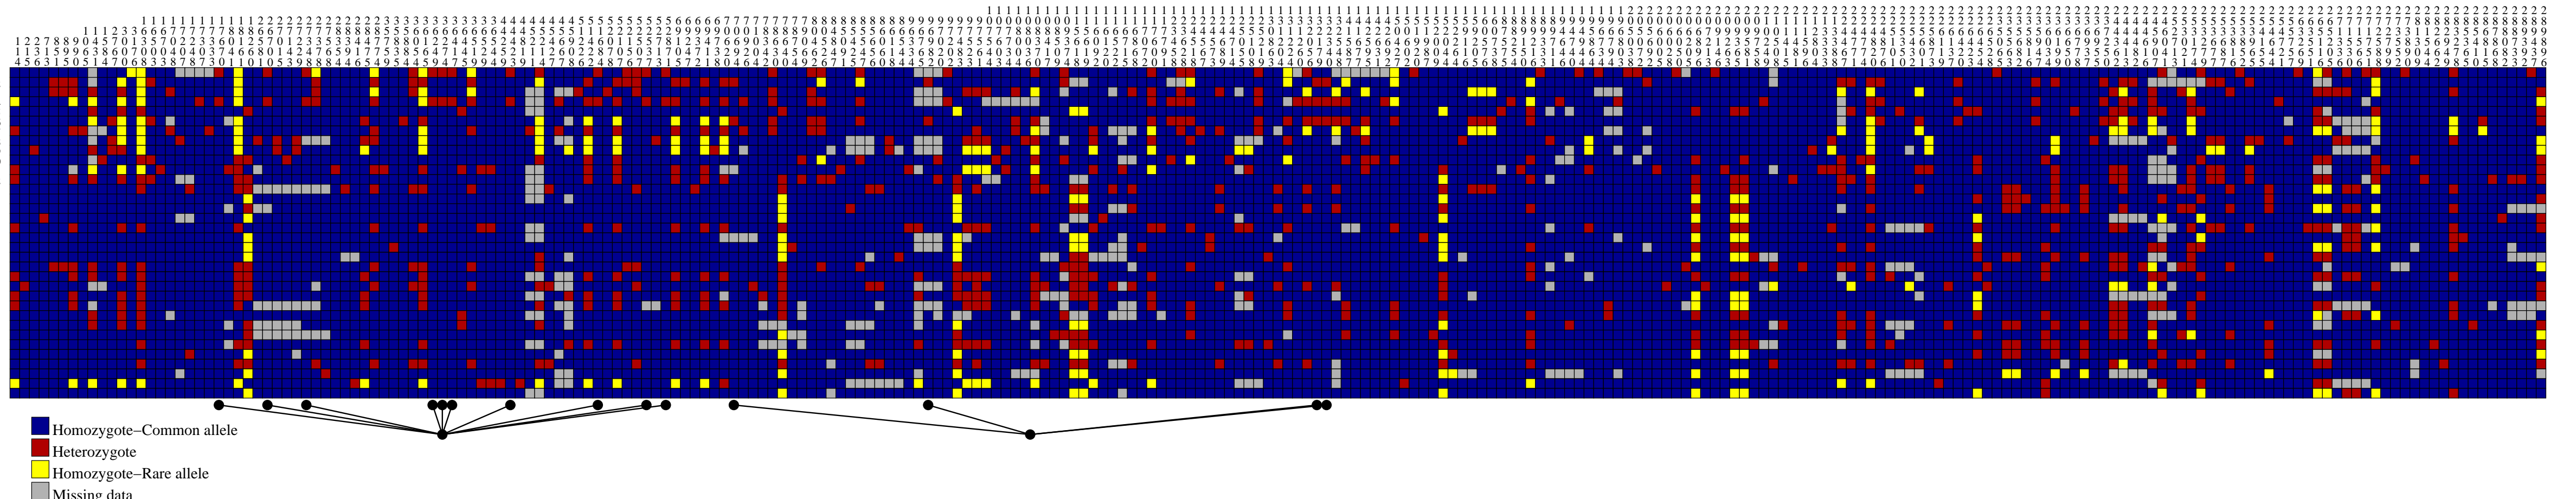

mmp21, p-value: 0.2758

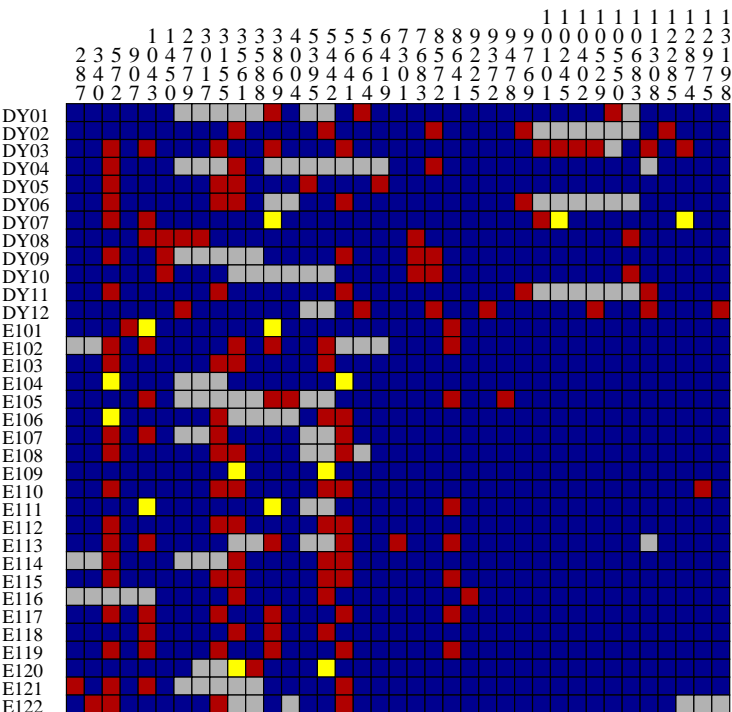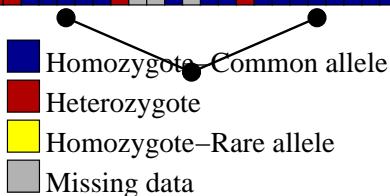

mmp8, p-value: 0.3896

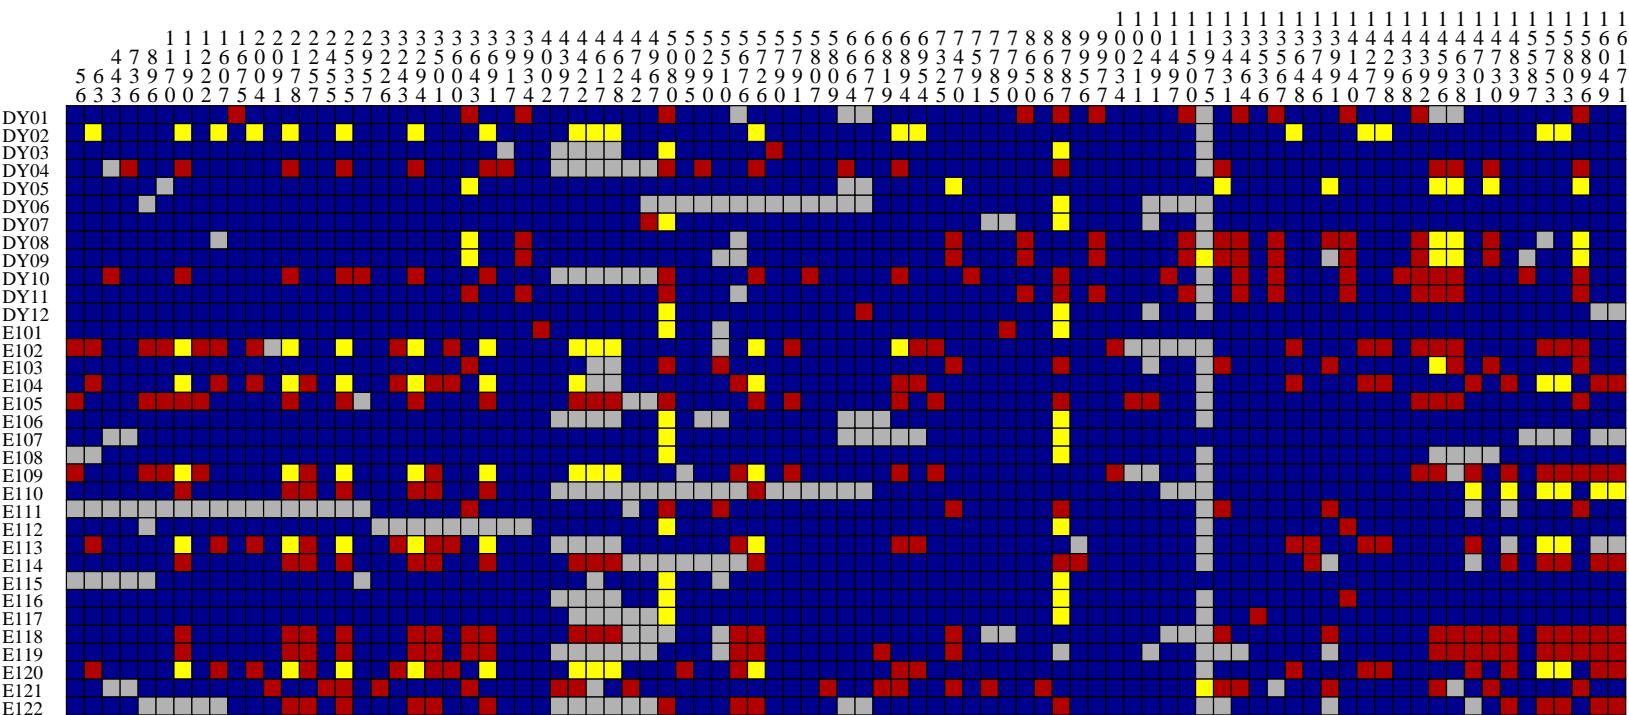

 Homozygote–Common allele

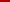 Heterozygote

■ Homozygote–Rare allele

Missing data

mmp9, p-value: 0.3168

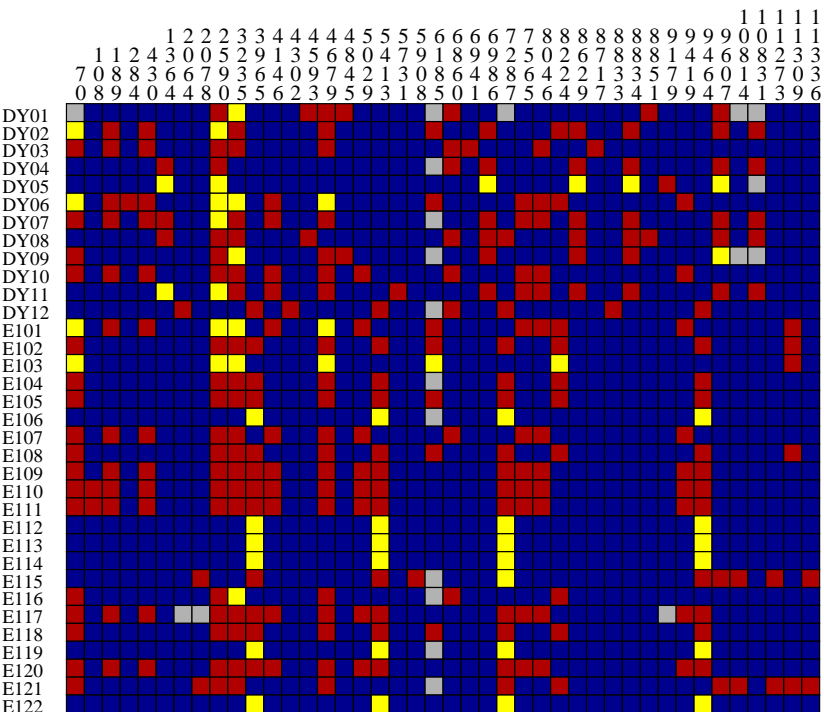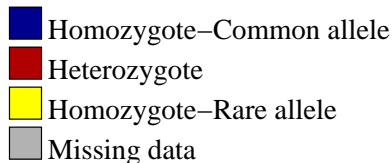

mms19l, p-value: 0.2052

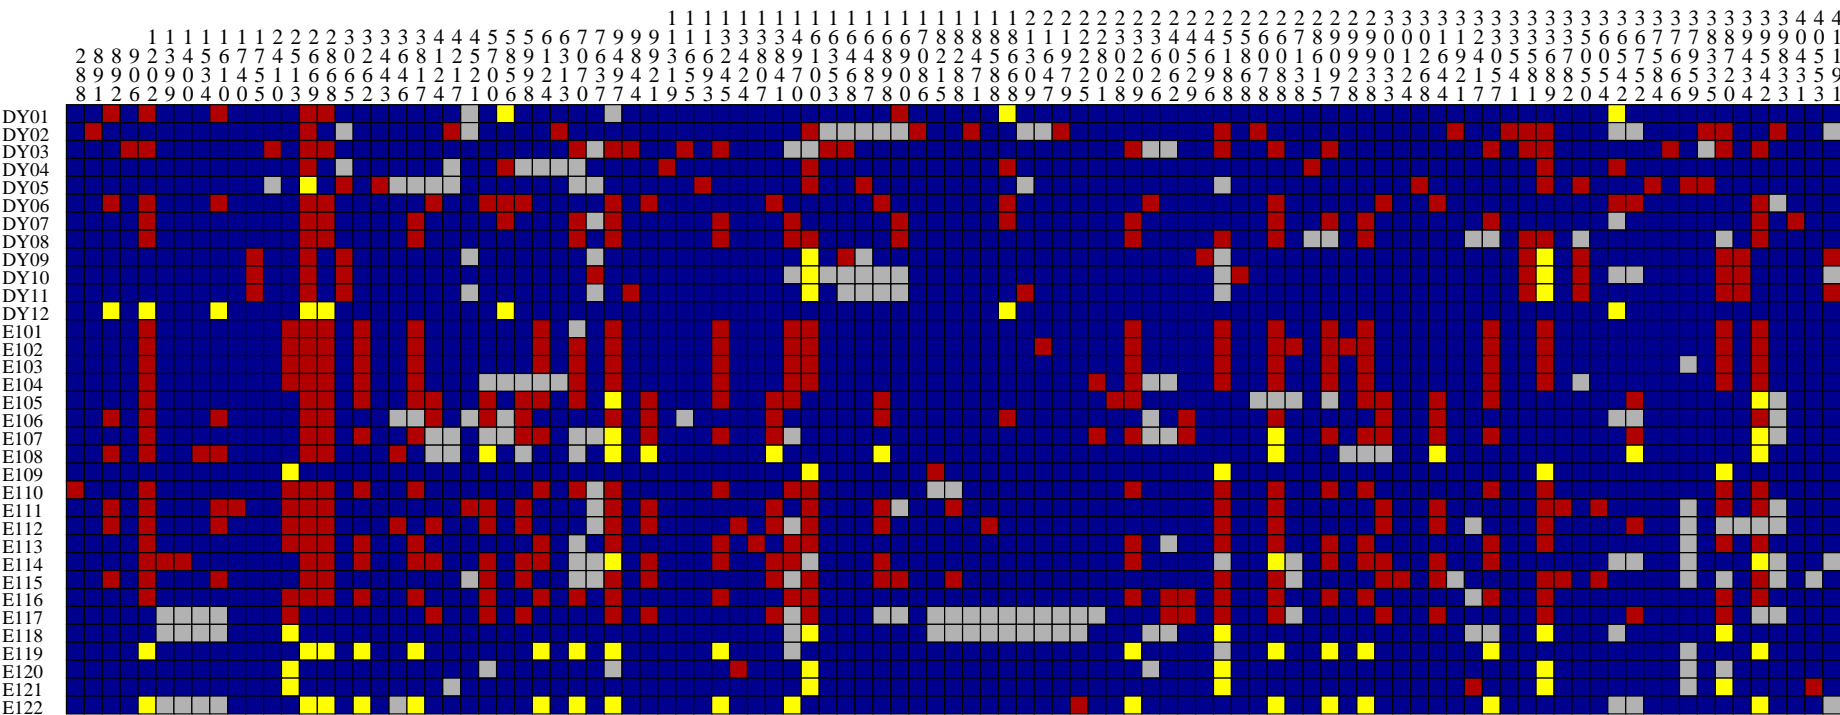

- Homozygote-Common allele
- Heterozygote
- Homozygote-Rare allele
- Missing data

mpo, p-value: 0.4972

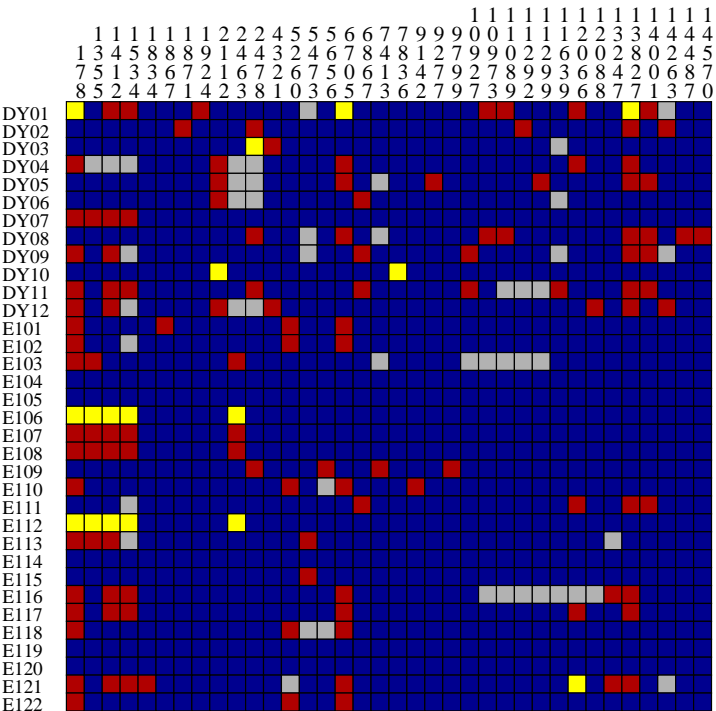

■ Homozygote–Common allele

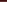 Heterozygote

■ Homozygote–Rare allele

Missing data

msh5, p-value: 0.2694

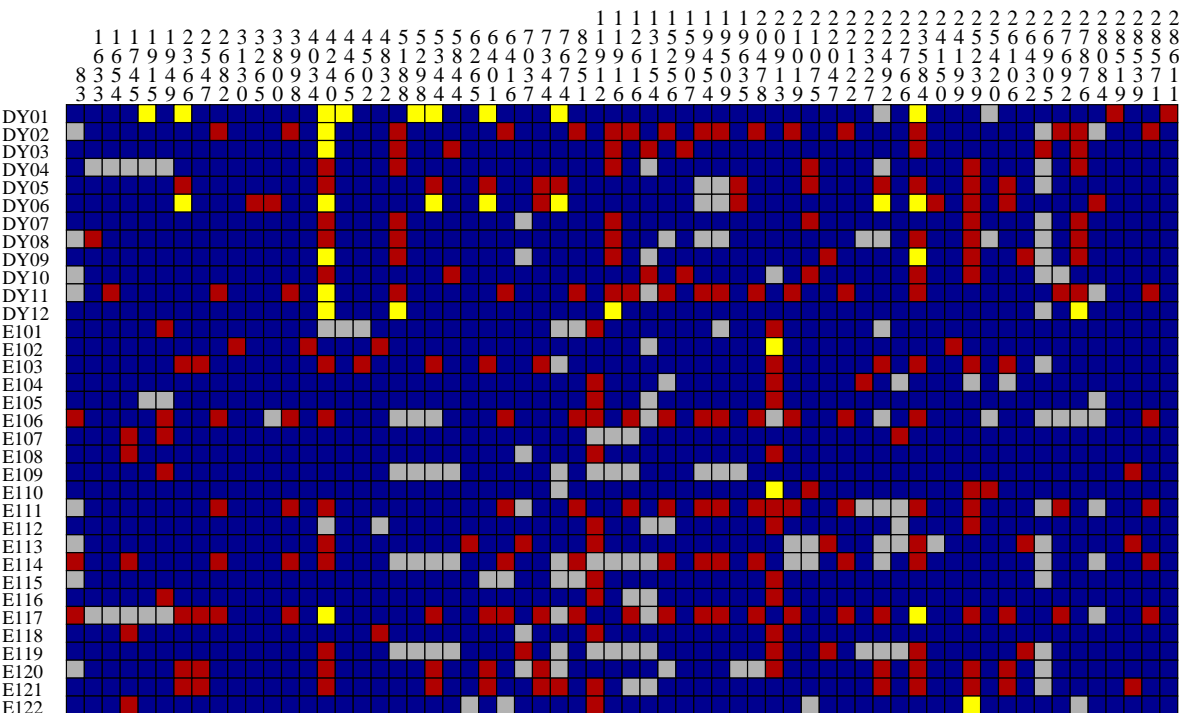

- Blue: Homozygote-Common allele
- Red: Heterozygote
- Yellow: Homozygote-Rare allele
- Grey: Missing data

msr1, p-value: 0.063

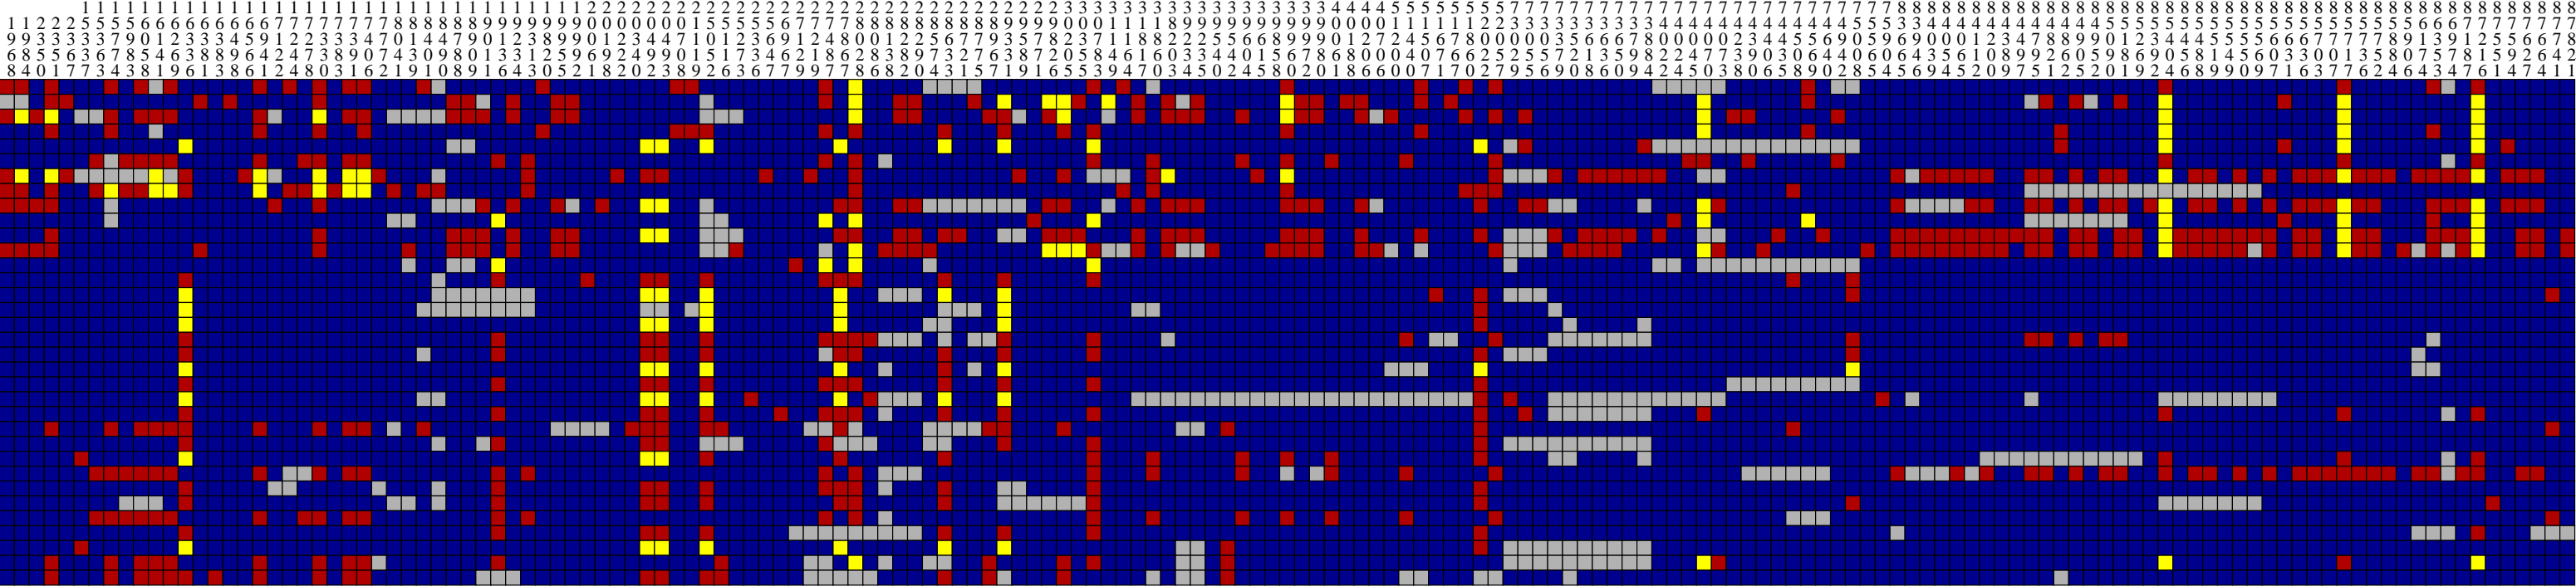

- Homozygote-Common allele
- Heterozygote
- Homozygote-Rare allele
- Missing data

ngb, p-value: 0.5068

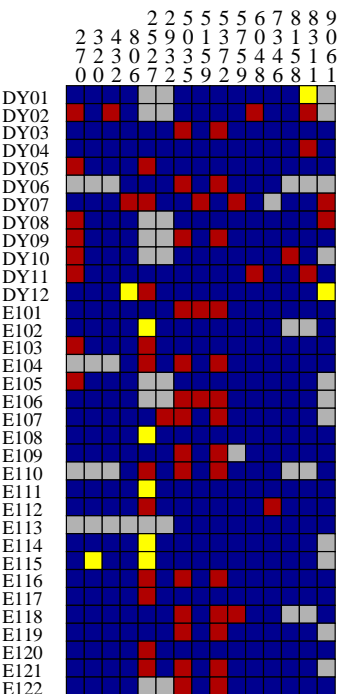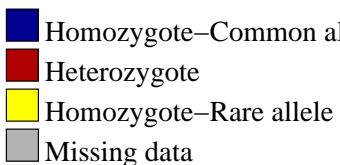

nos2a, p-value: 0.1934

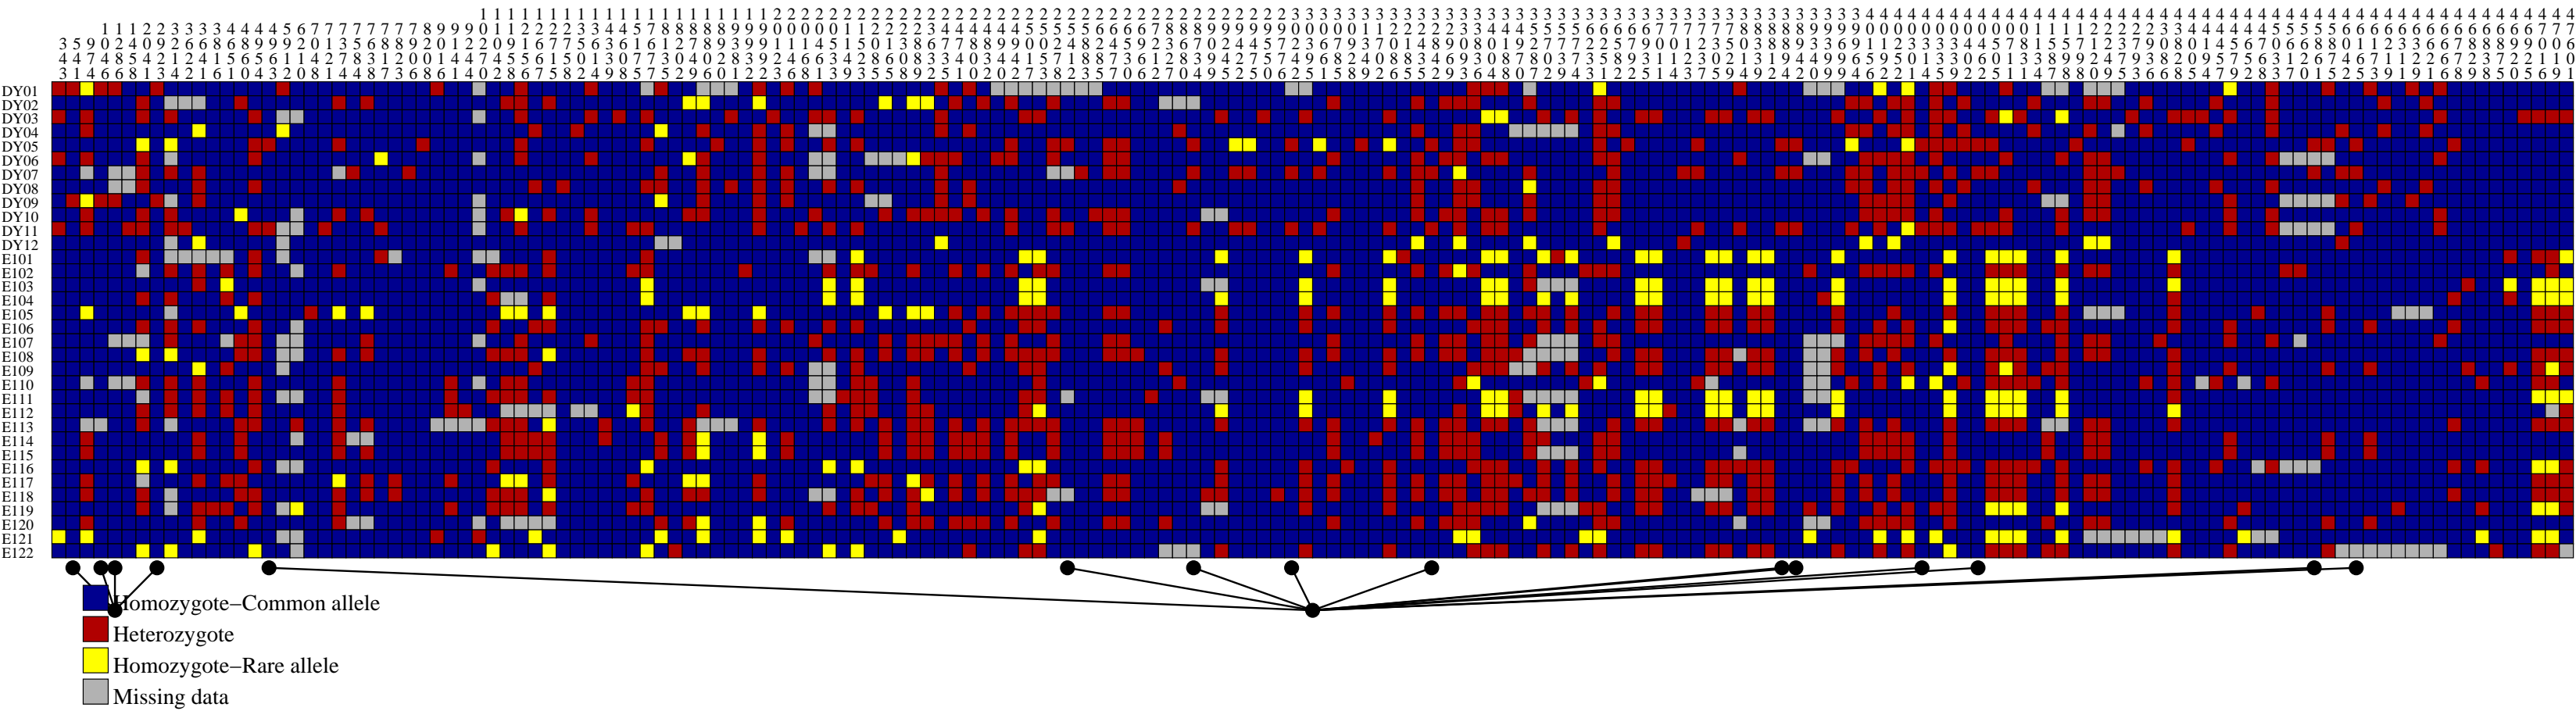

[illegible]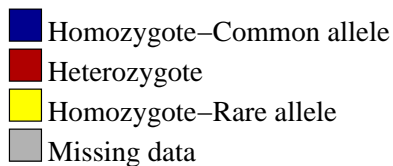

odc1, p-value: 0.0664

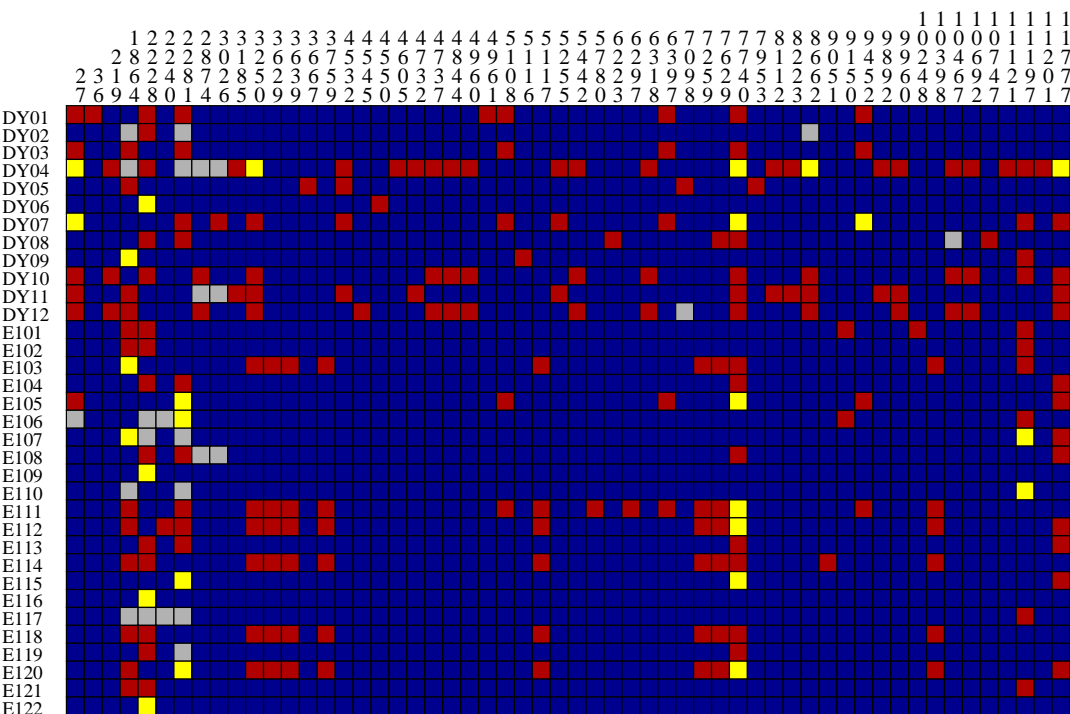

Blue Homozygote-Common allele

Red Heterozygote

Yellow Homozygote-Rare allele

Grey Missing data

osr1, p-value: 0.7136

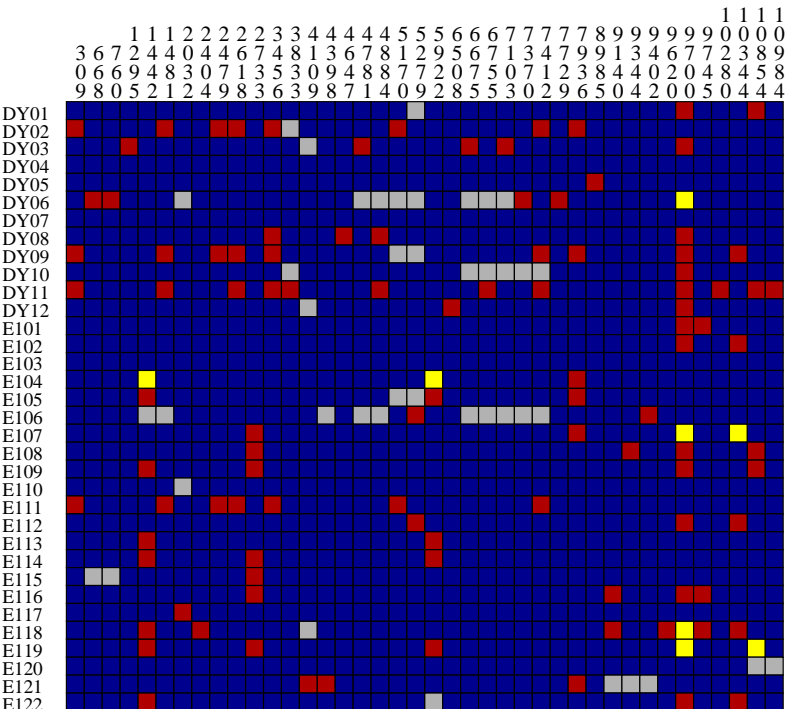

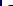 Homozygote–Common allele  
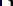 Heterozygote  
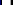 Homozygote–Rare allele  
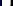 Missing data

oxr1, p-value: 0.1232

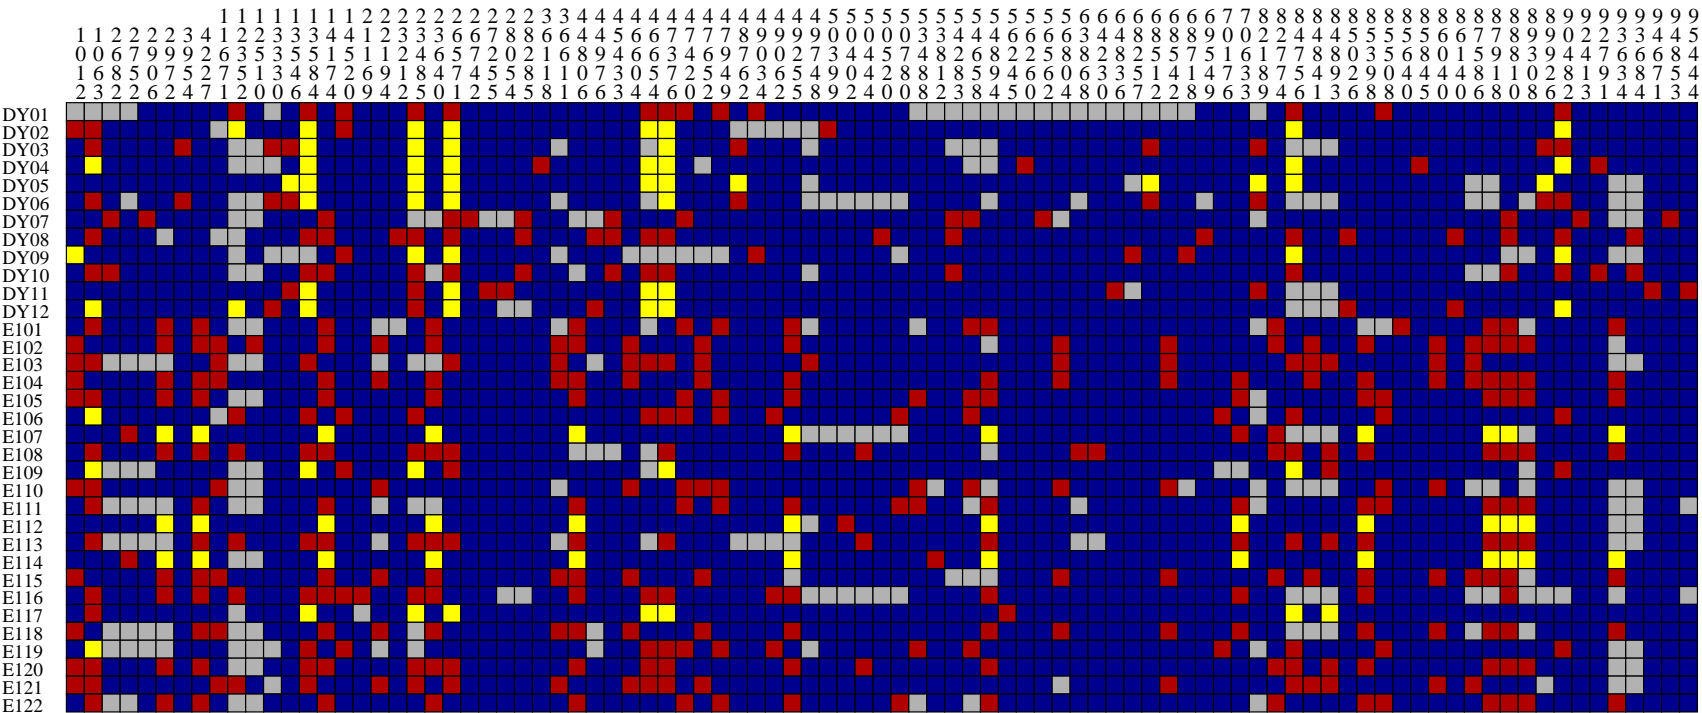

■ Homozygote–Common allele

 Heterozygote

     Homozygote–Rare allele

Missing data

oxsr1, p-value: 0.0188

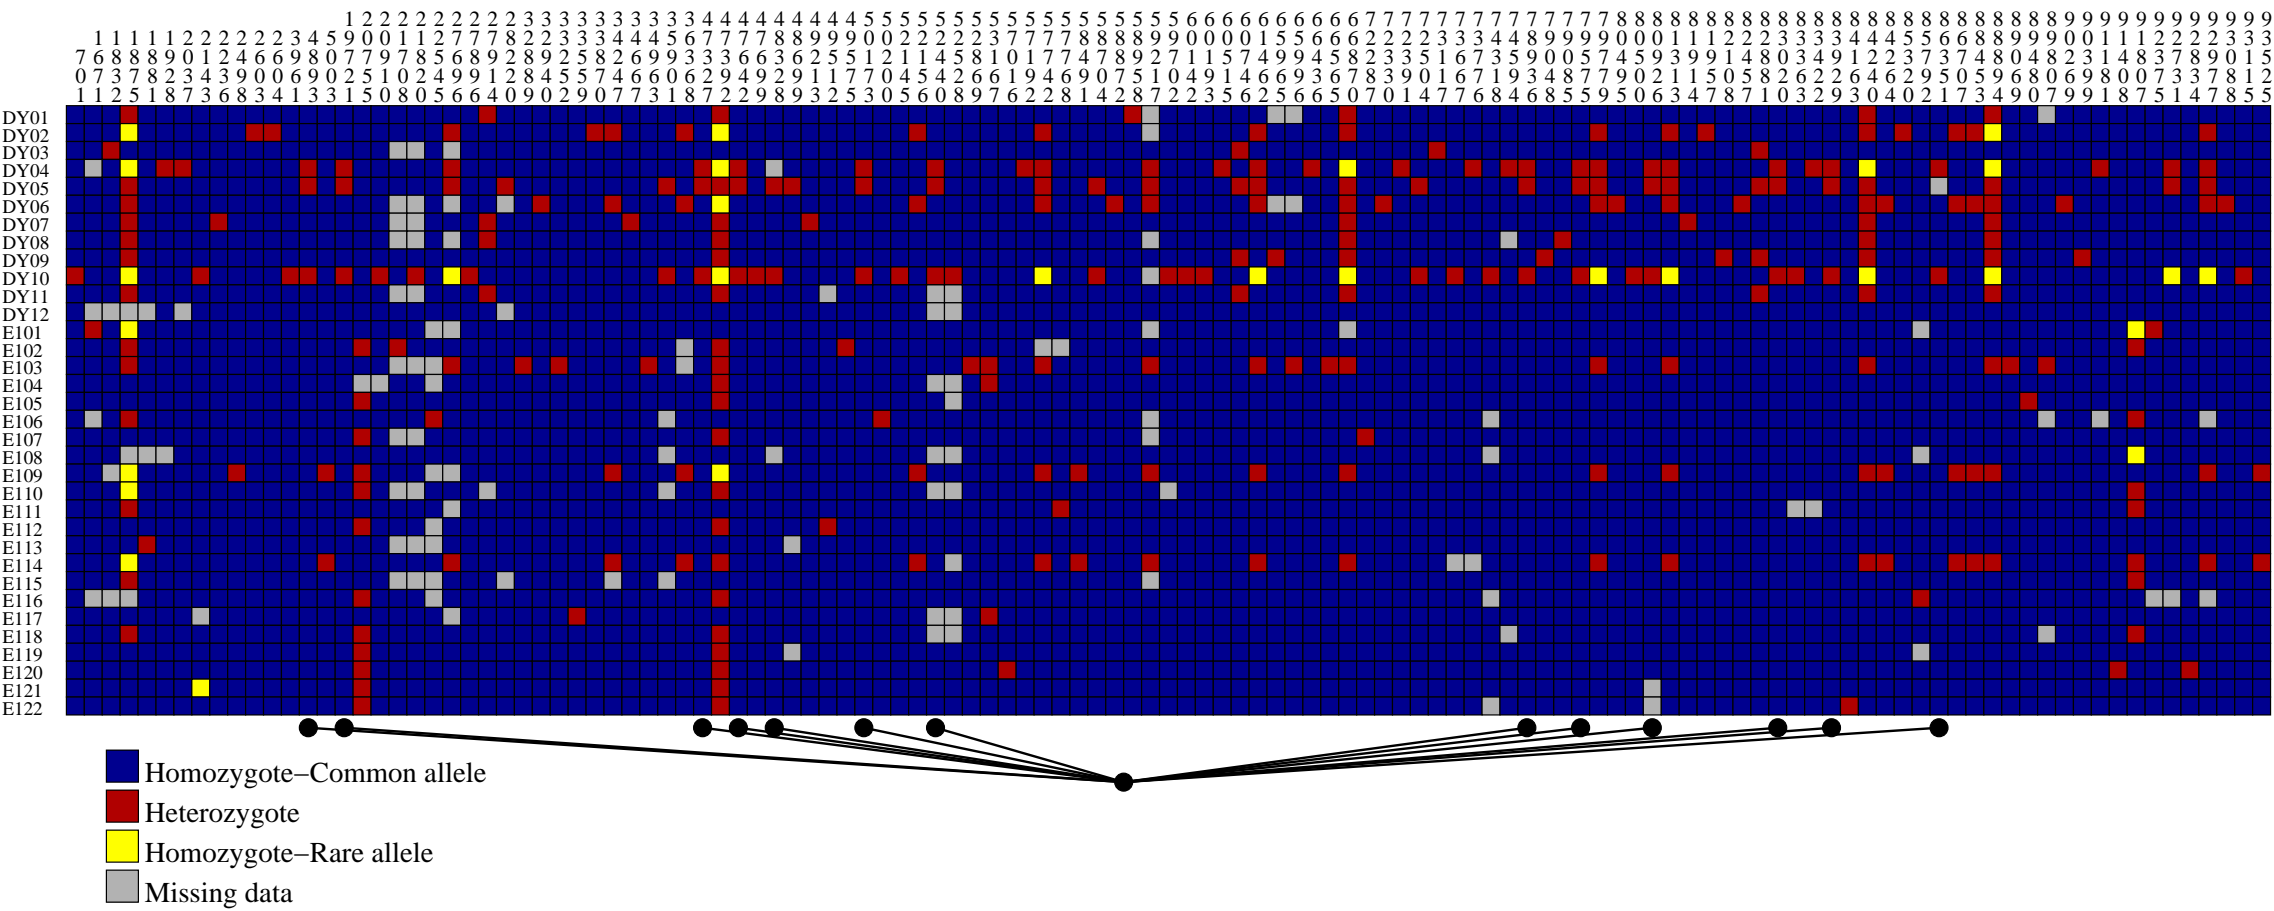

pax3, p-value: 0.8552

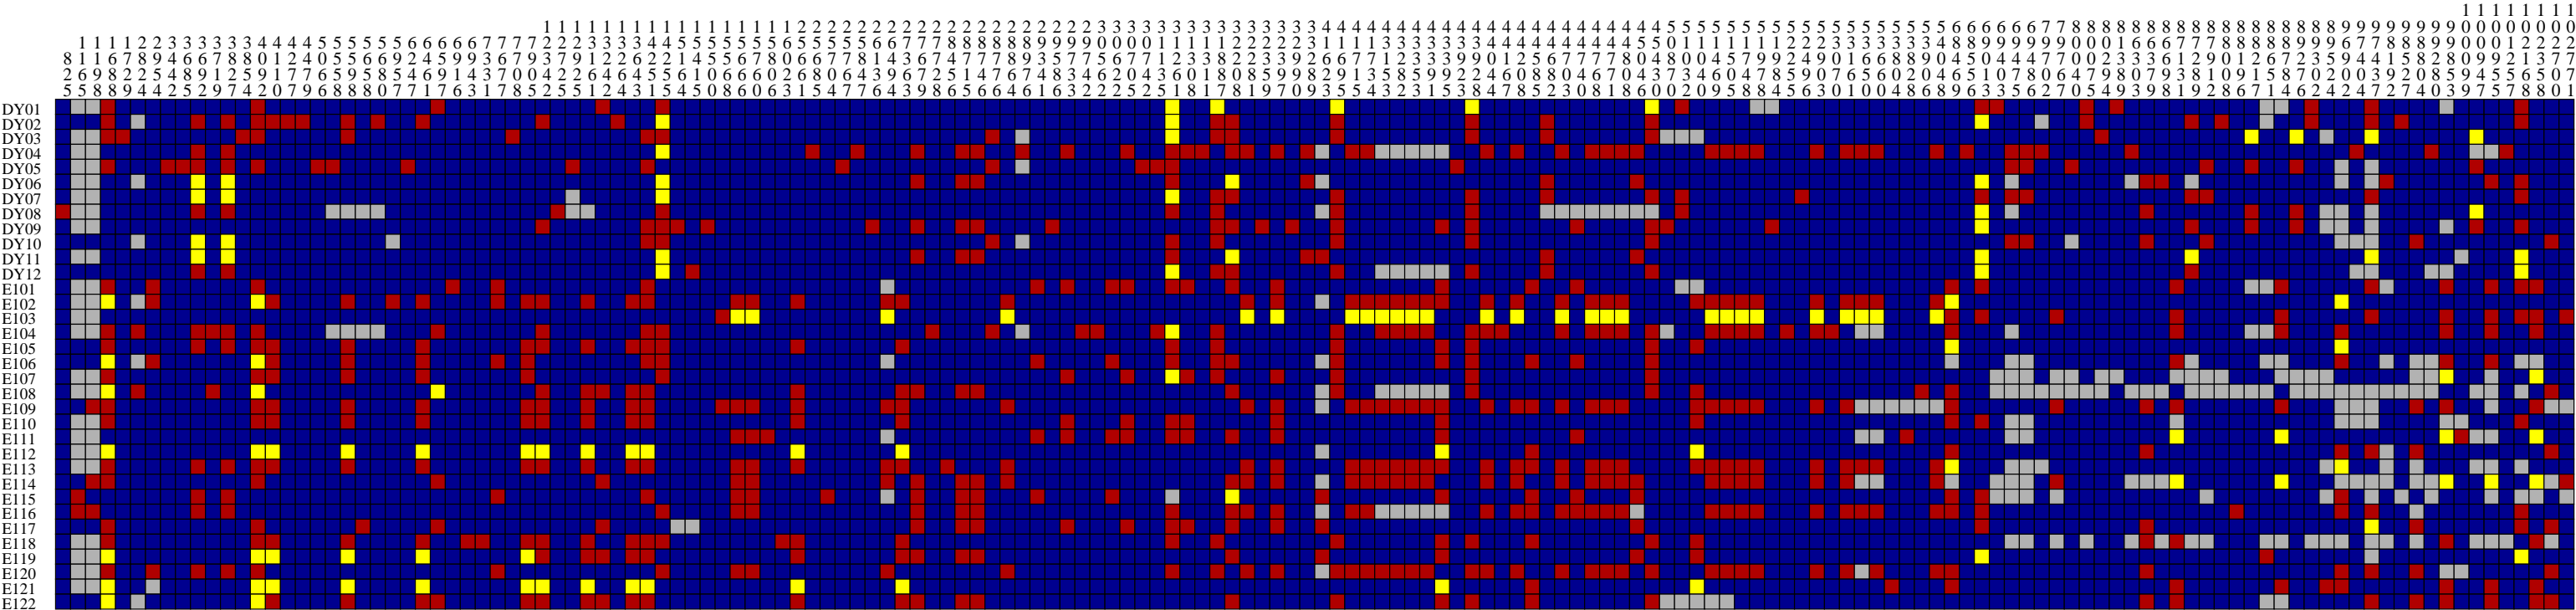

- Homozygote-Common allele
- Heterozygote
- Homozygote-Rare allele
- Missing data

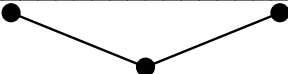

pdlim1, p-value: 0.3724

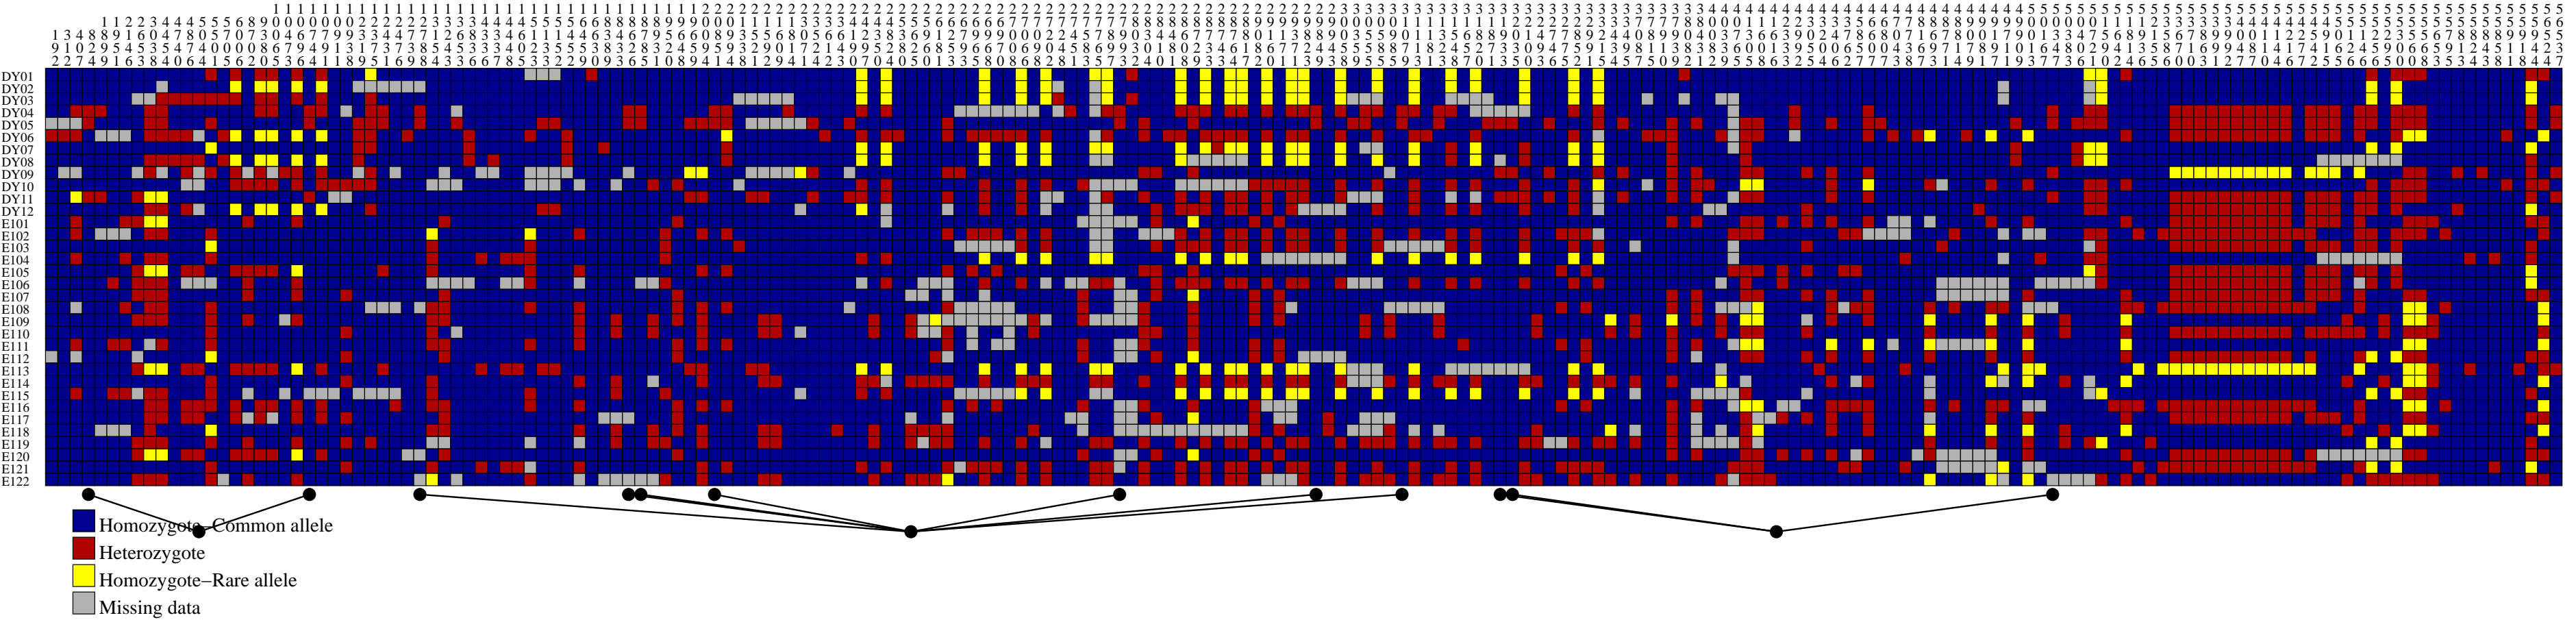

pold4, p-value: 0.112

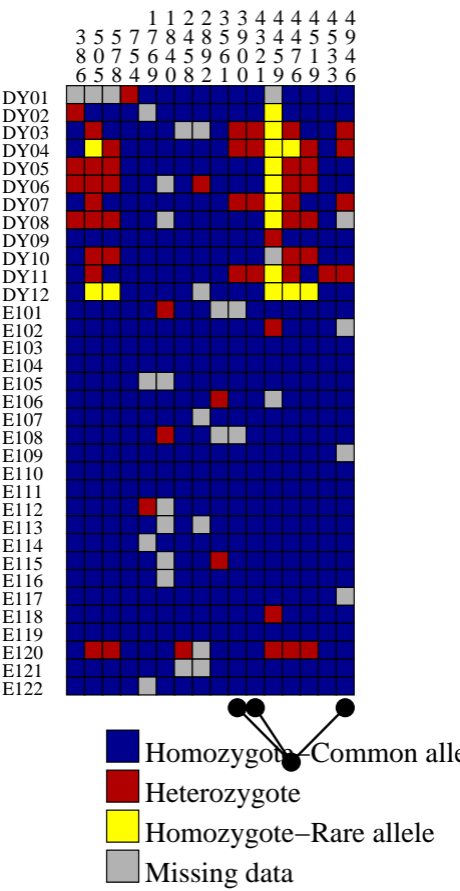



polm, p-value: 0.1182

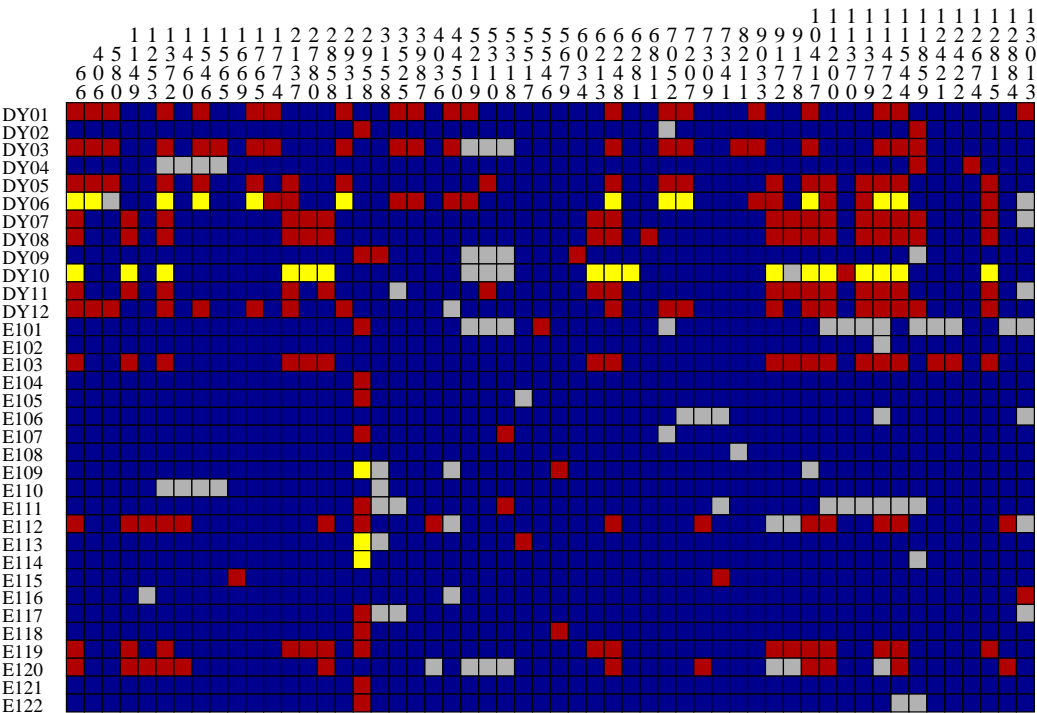

■ Homozygote–Common allele

Heterozygote

■ Homozygote–Rare allele

Missing data

poln, p-value: 0.2084

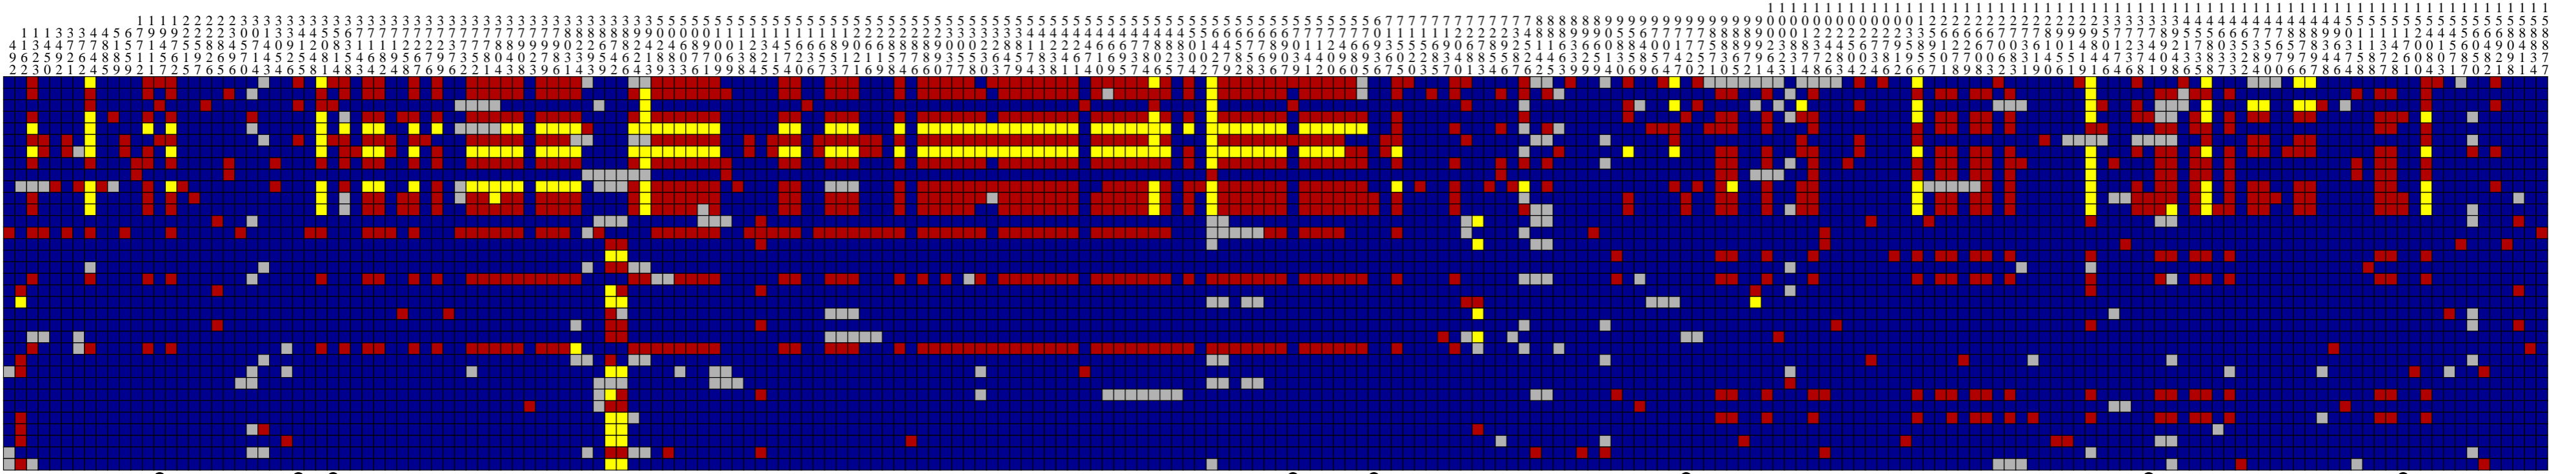

- Homozygote-Common allele
- Heterozygote
- Homozygote-Rare allele
- Missing data

ppib, p-value: 0.2506

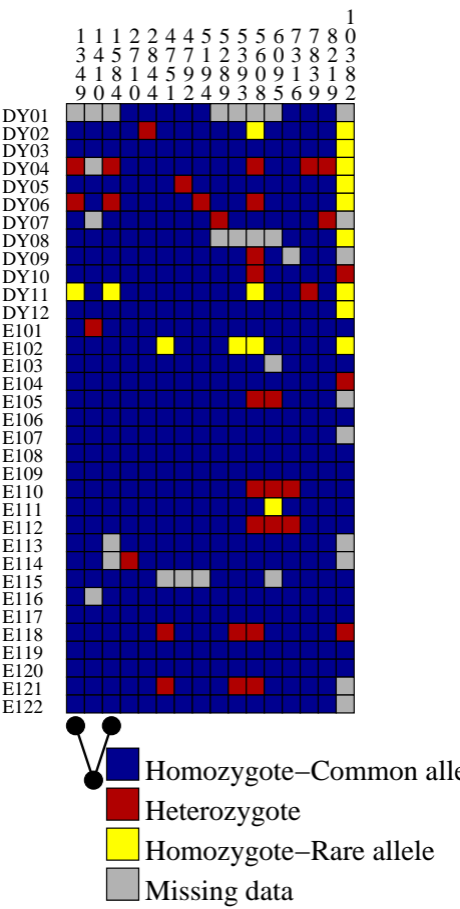

prdx2, p-value: 0.0304

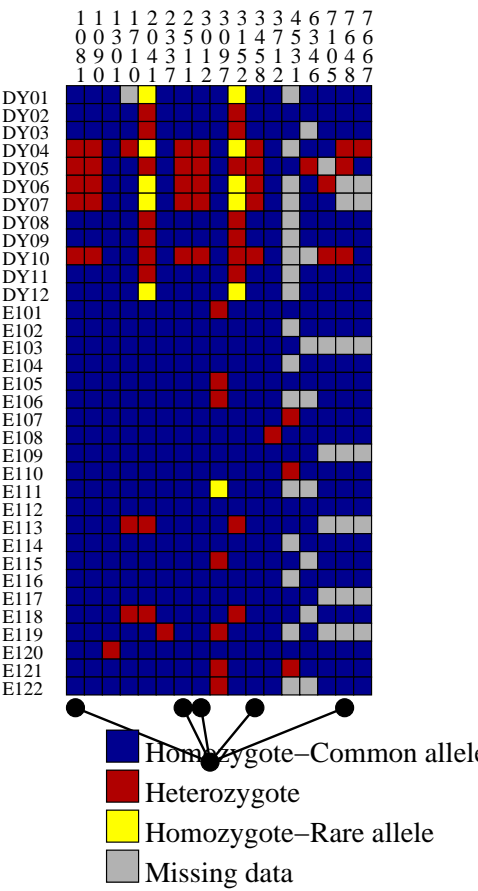

prdx5, p-value: 0.0744

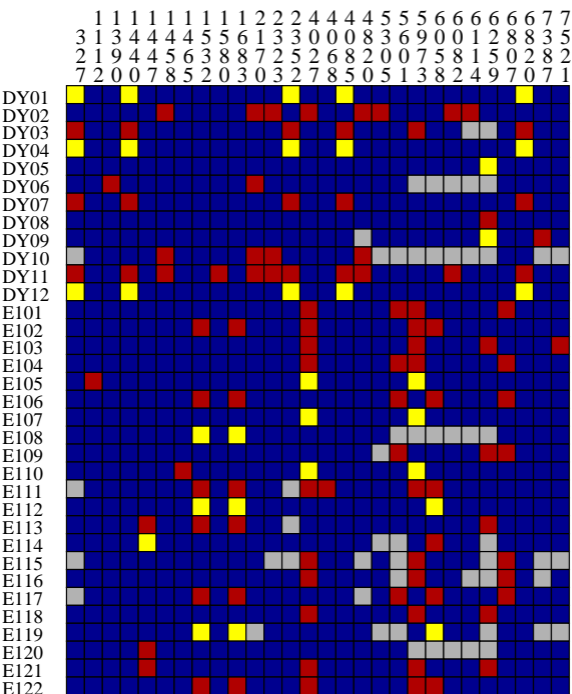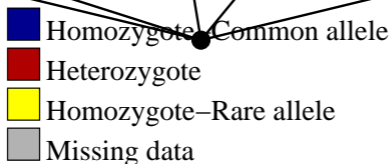



[illegible]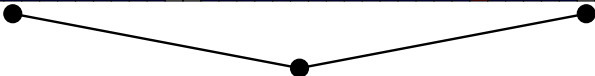

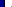 Homozygote–Common allele  
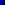 Heterozygote  
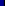 Homozygote–Rare allele  
 Missing data

rac1, p-value: 0.667

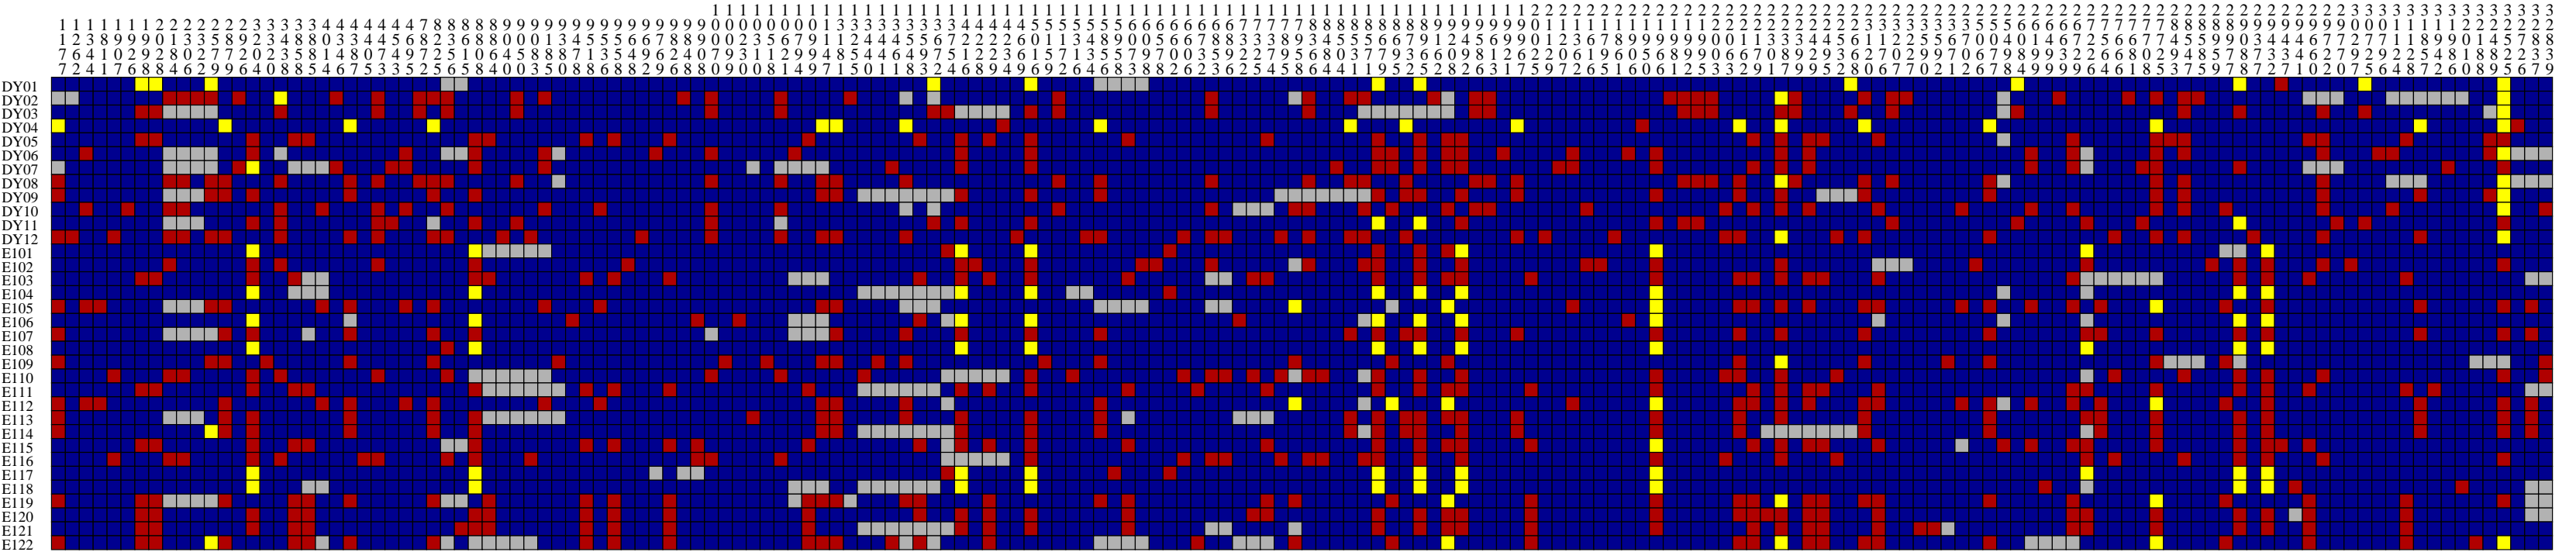

■ Homozygote–Common allele

 Heterozygote

■ Homozygote–Rare allele

Missing data

rad18, p-value: 0.06

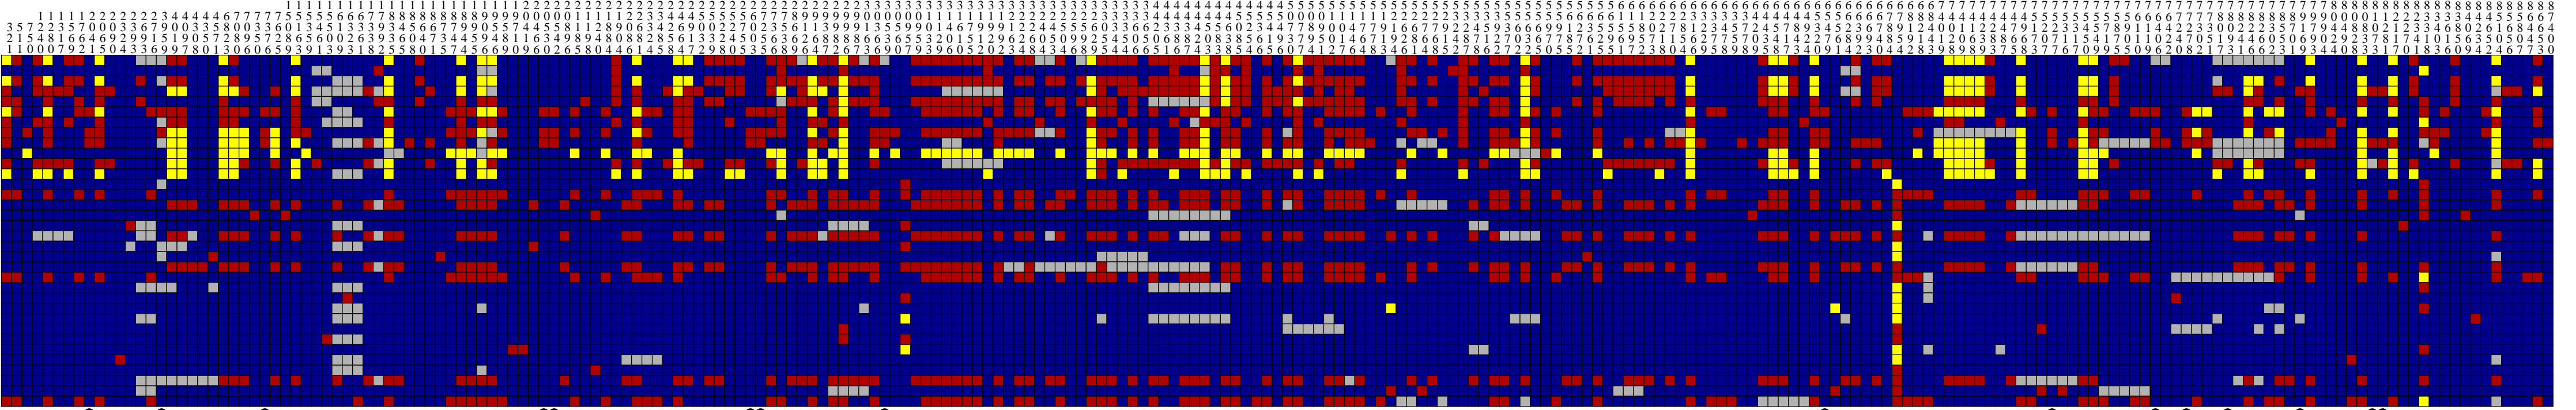

- Homozygote-Common allele
- Heterozygote
- Homozygote-Rare allele
- Missing data

rad511, p-value: 0.4056

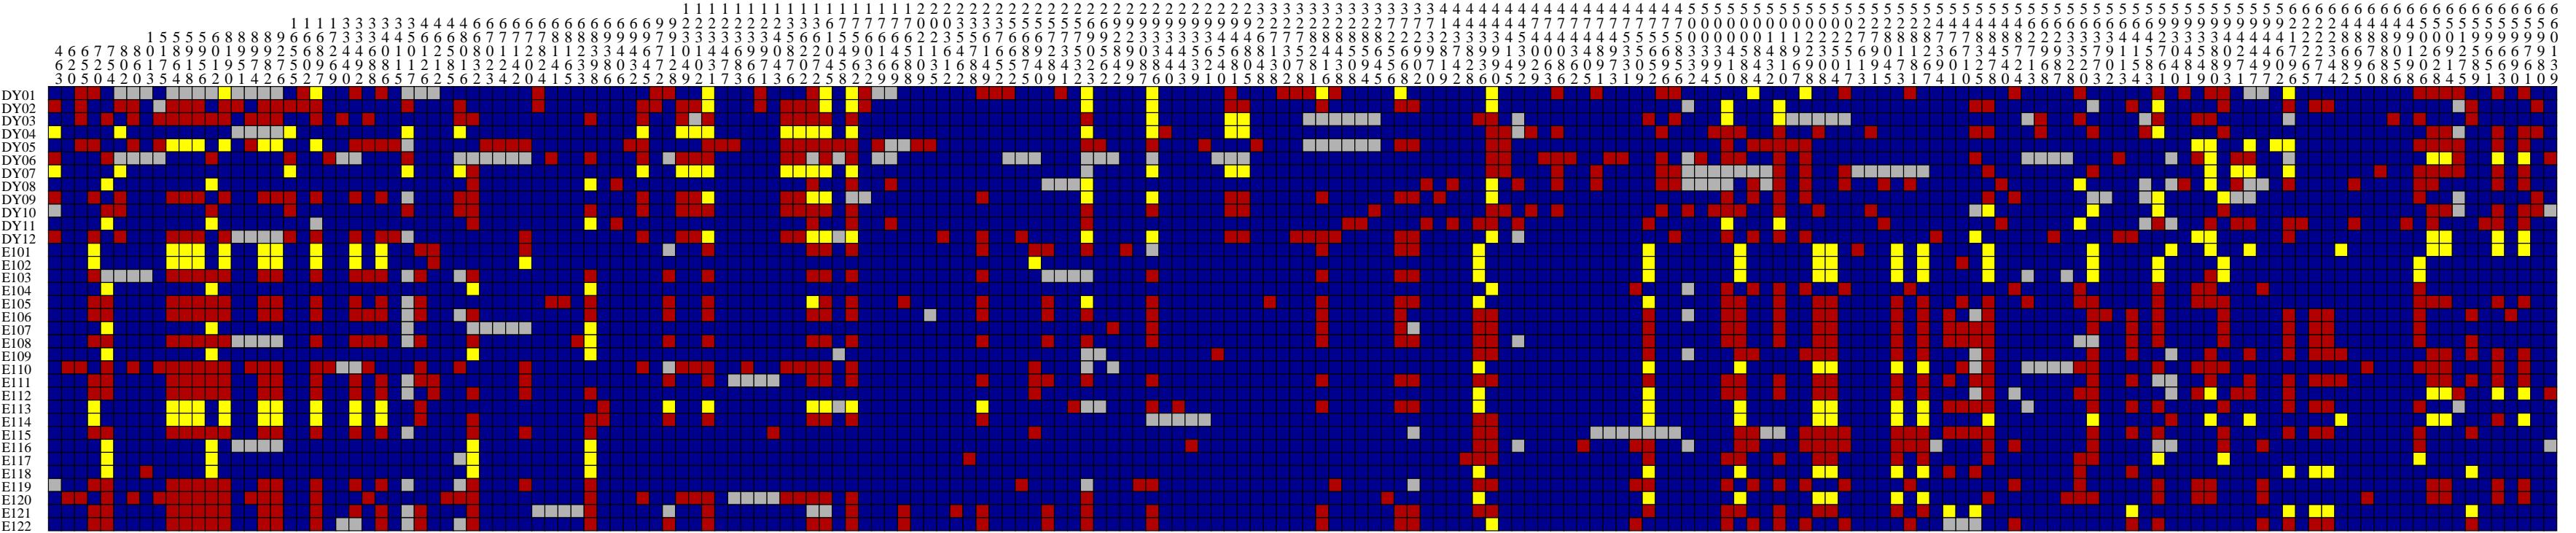

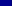 Homozygote–Common allele  
 Heterozygote  
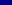 Homozygote–Rare allele  
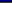 Missing data

recql4, p-value: 0.119

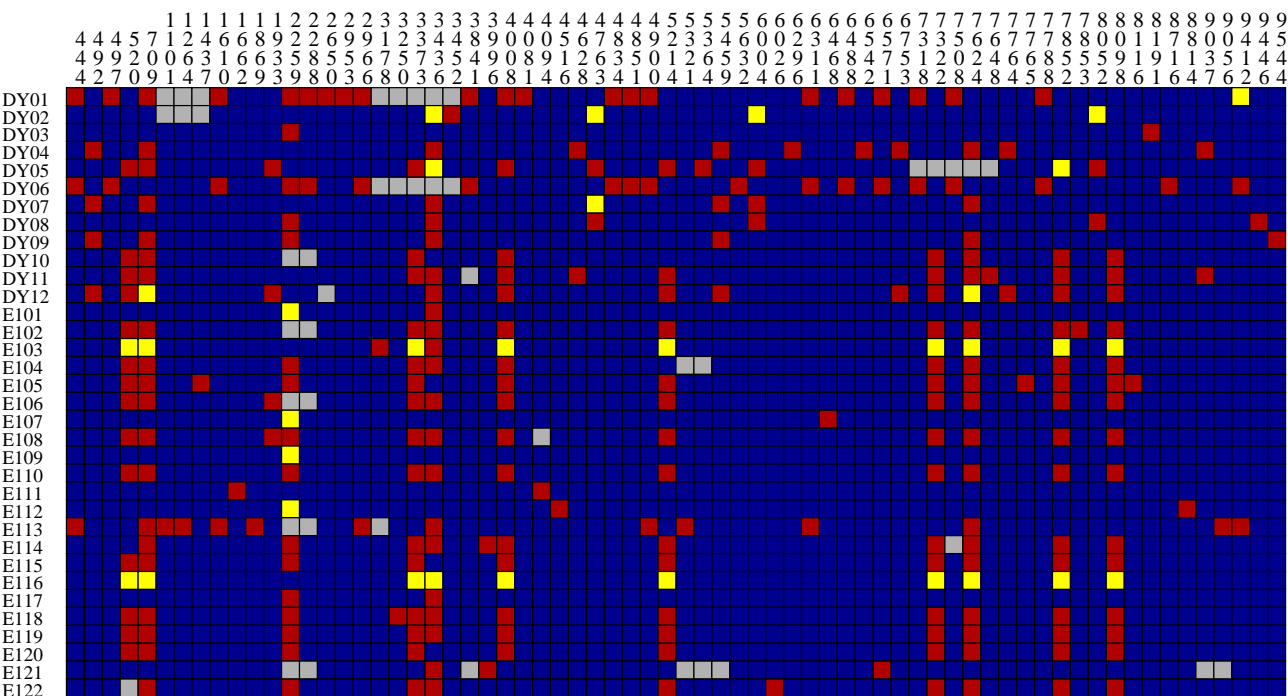

Blue Homozygote-Common allele

Red Heterozygote

Yellow Homozygote-Rare allele

Grey Missing data

rev11, p-value: 0.6642

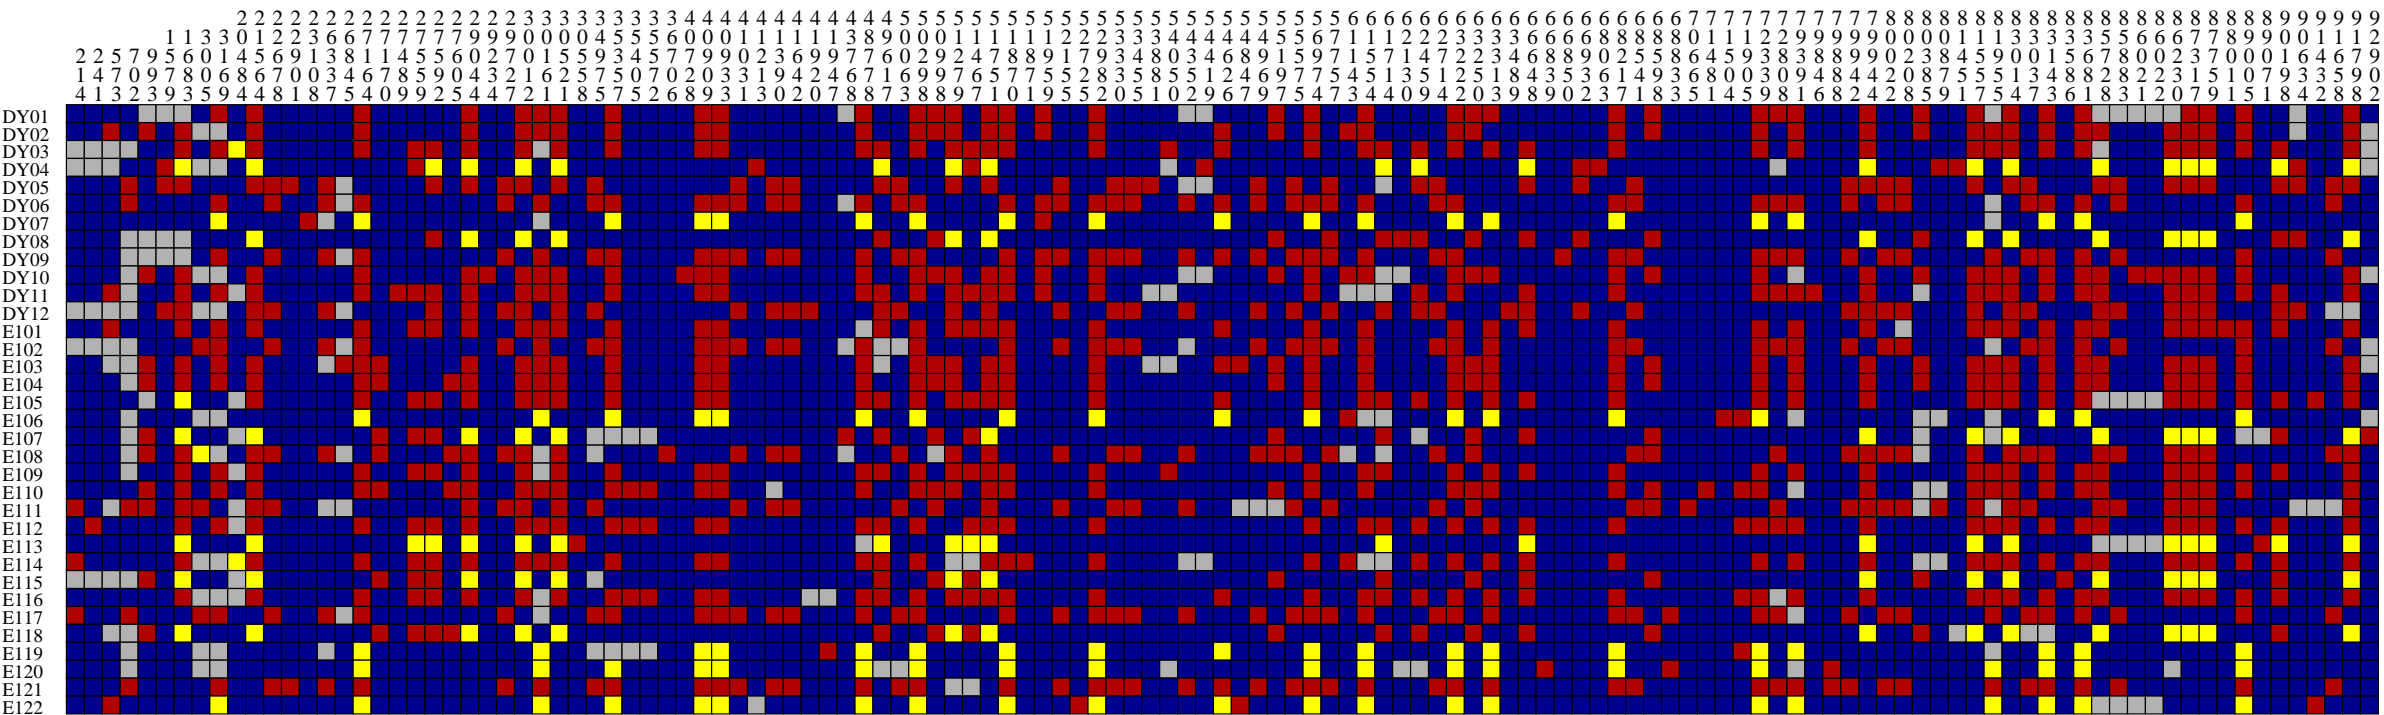

- Homozygote-Common allele
- Heterozygote
- Homozygote-Rare allele
- Missing data

rpa2, p-value: 0.2302

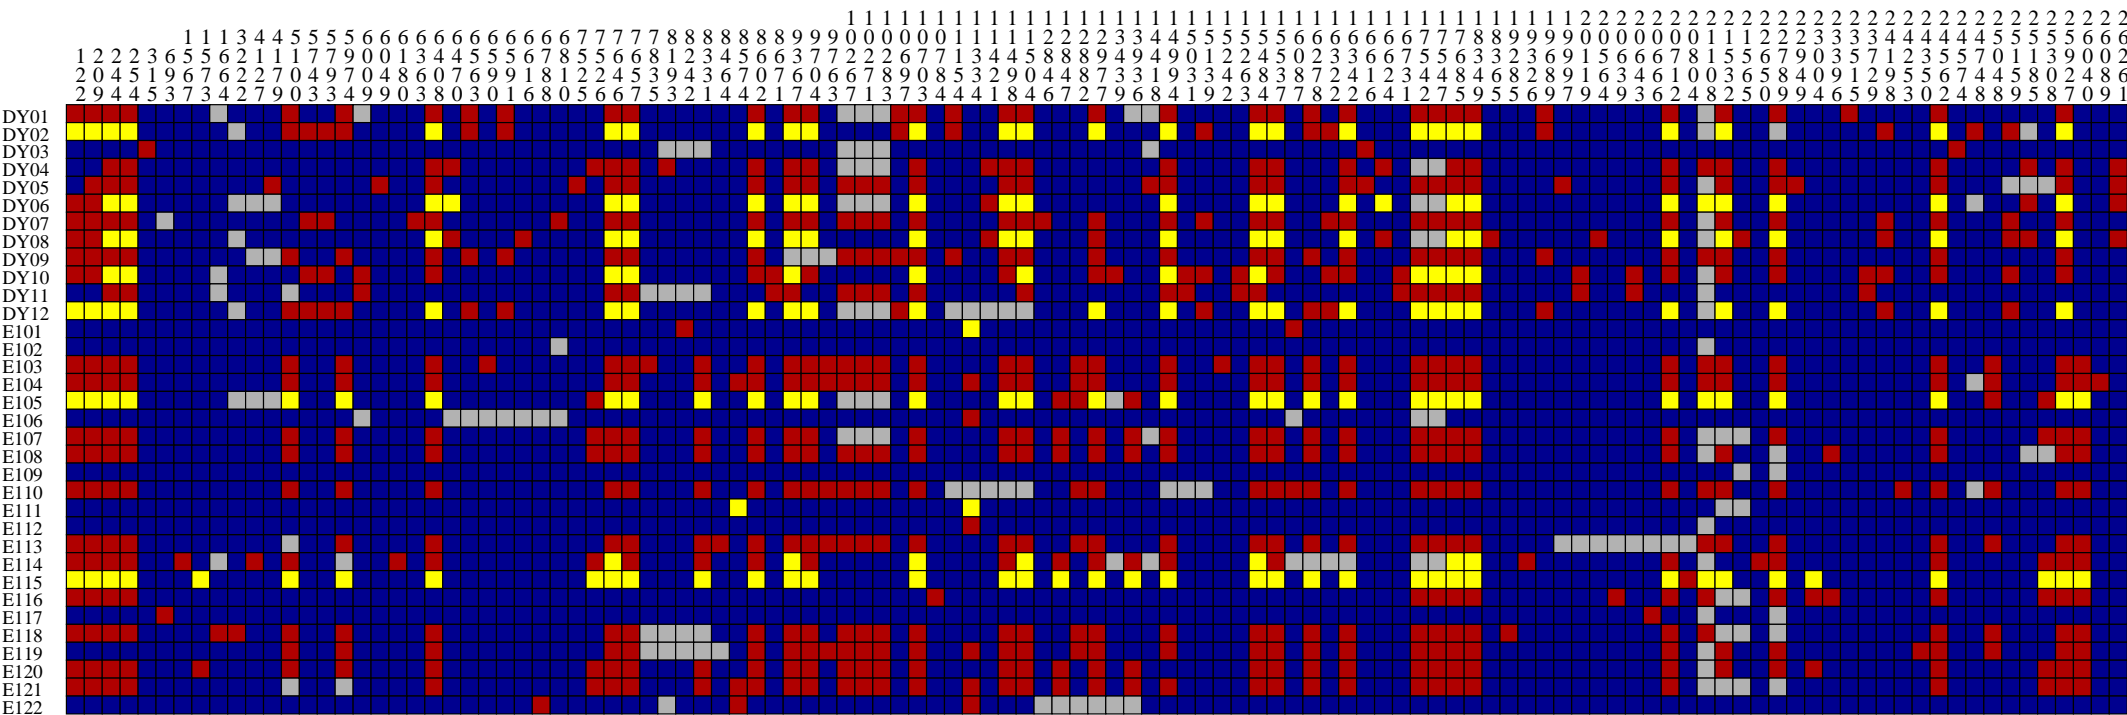

- Homozygote-Common allele
- Heterozygote
- Homozygote-Rare allele
- Missing data

rpa3, p-value: 0.0486

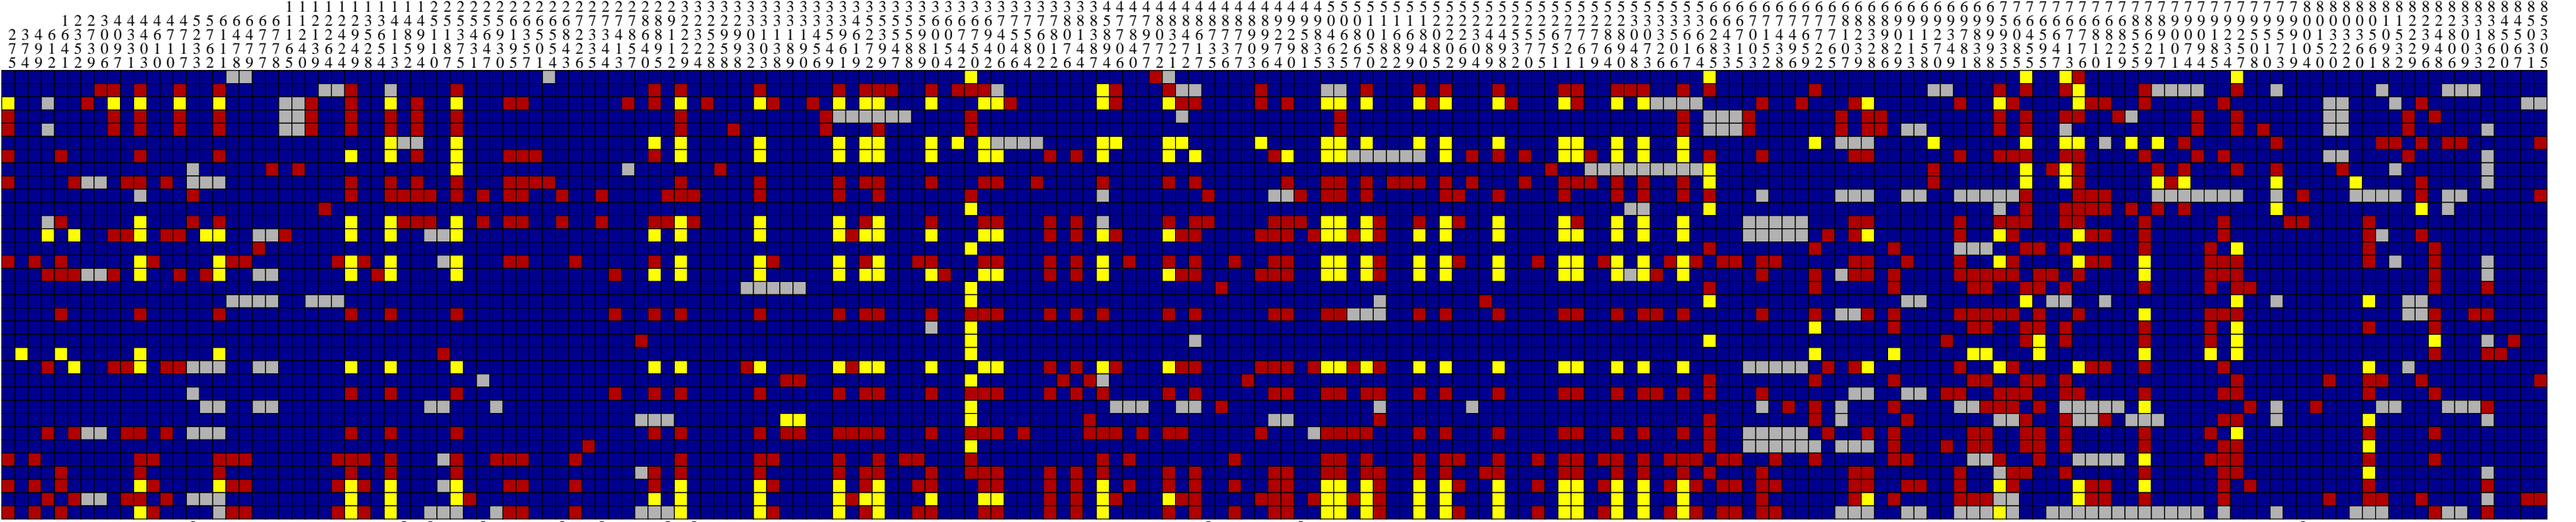

- Homozygote-Common allele
- Heterozygote
- Homozygote-Rare allele
- Missing data

rrm2b, p-value: 0.7854

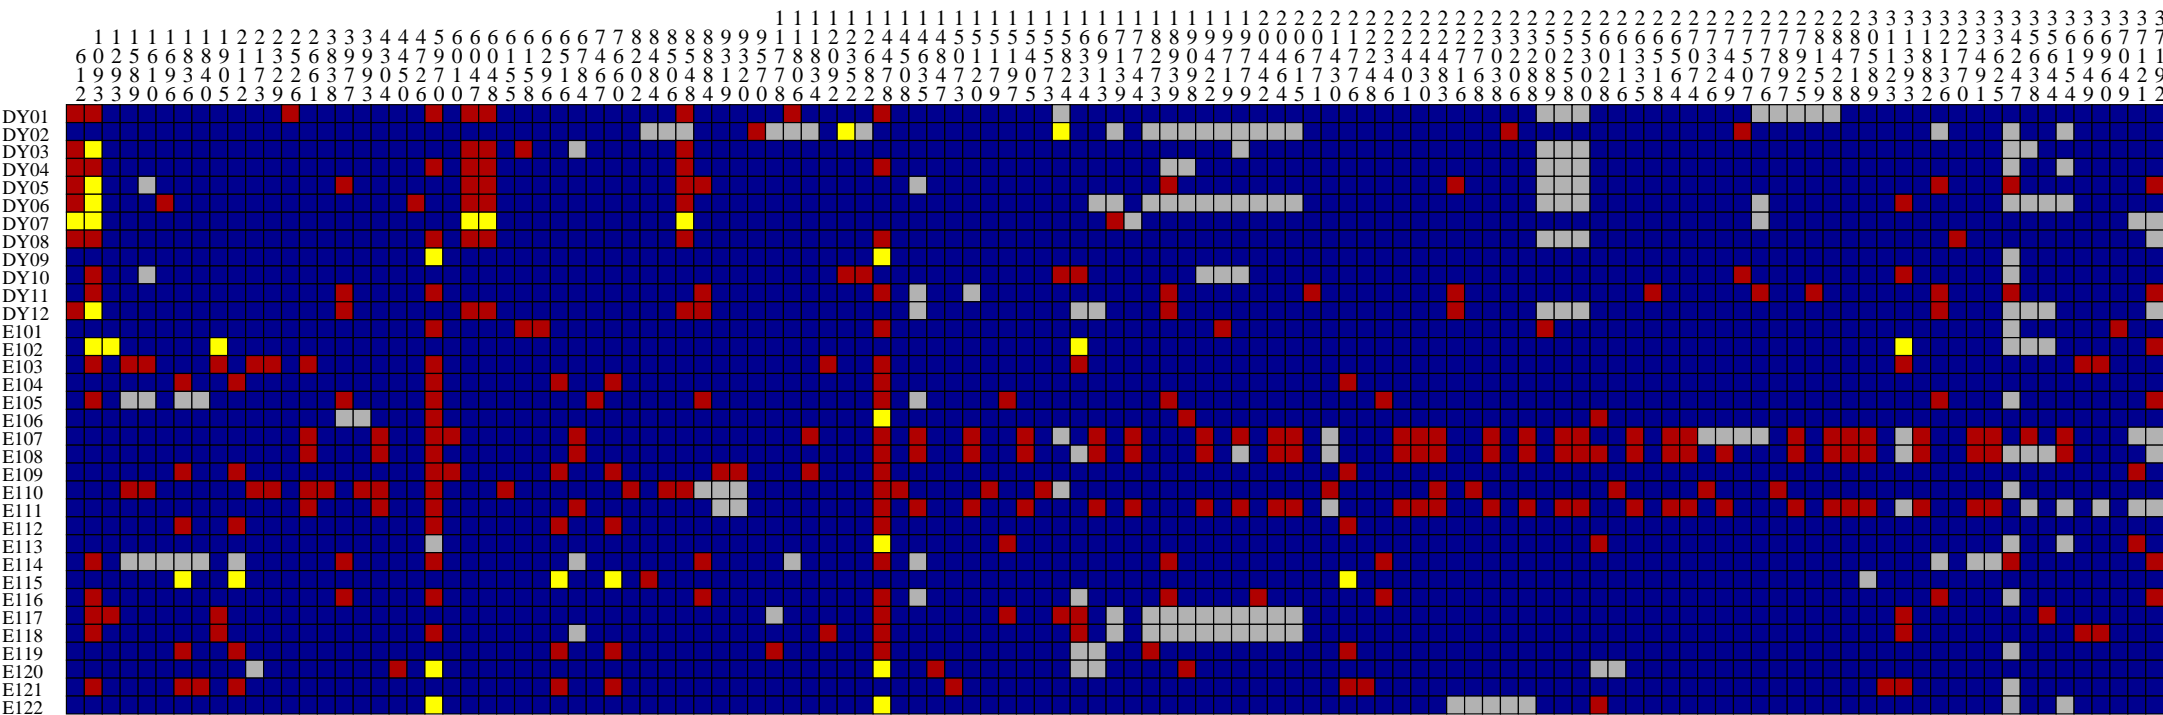

● Common allele  
● Heterozygote  
● Homozygote-Rare allele  
● Missing data

scara3, p-value: 0.2458

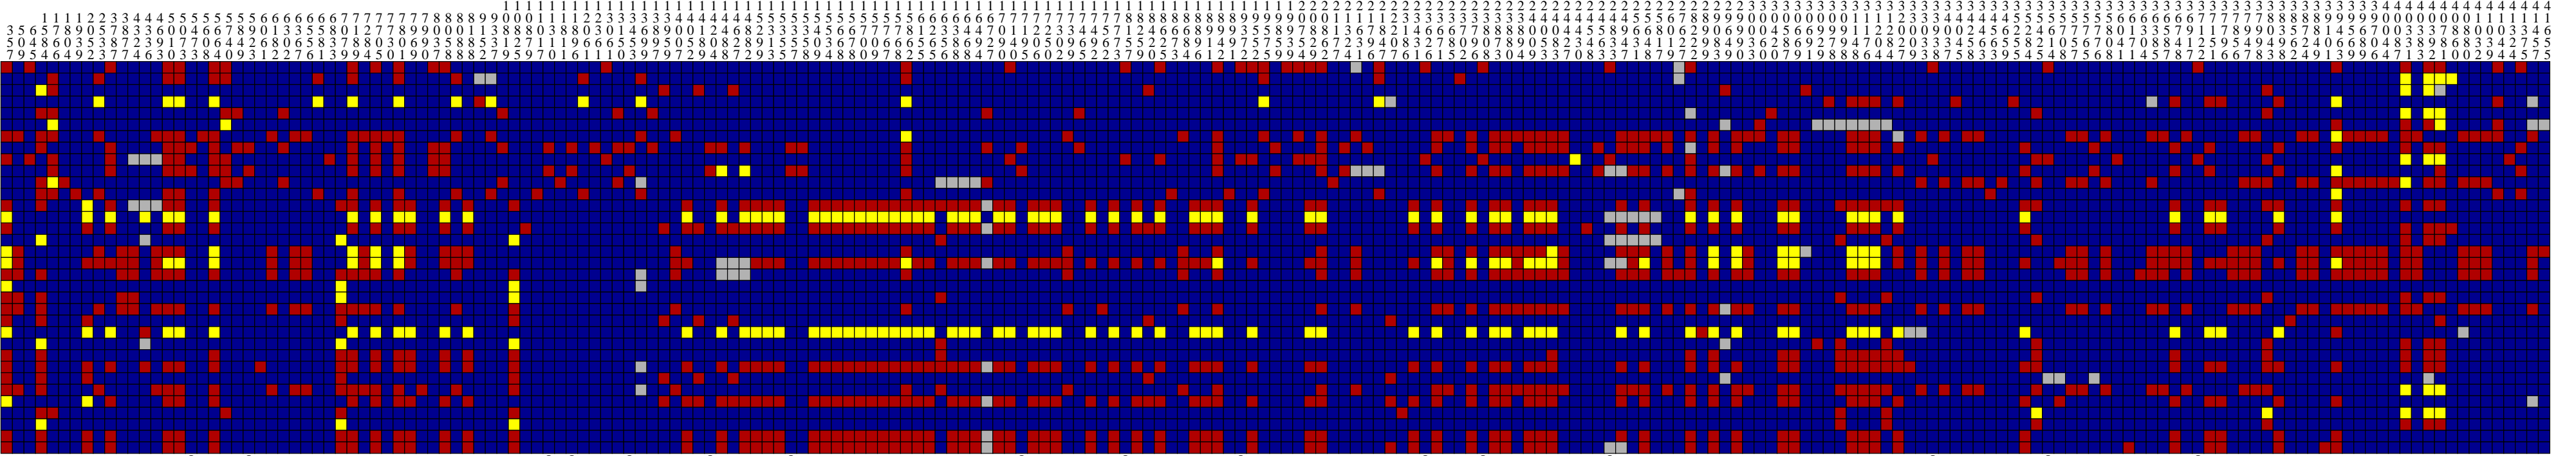

- Homozygote-Common allele
- Heterozygote
- Homozygote-Rare allele
- Missing data



slc4a2, p-value: 0.056

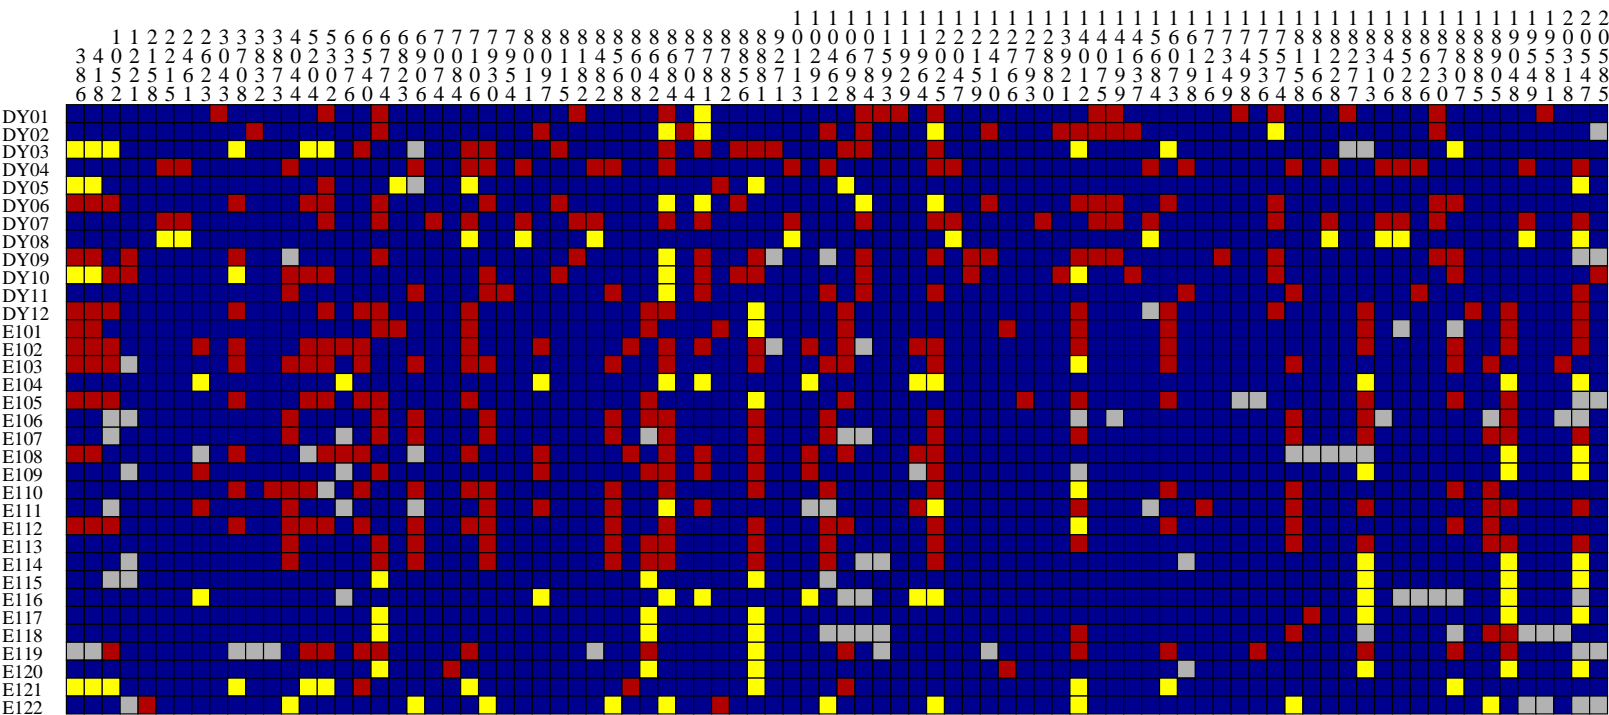

- Homozygote-Common allele
- Heterozygote
- Homozygote-Rare allele
- Missing data

smarcb1, p-value: 0.2264

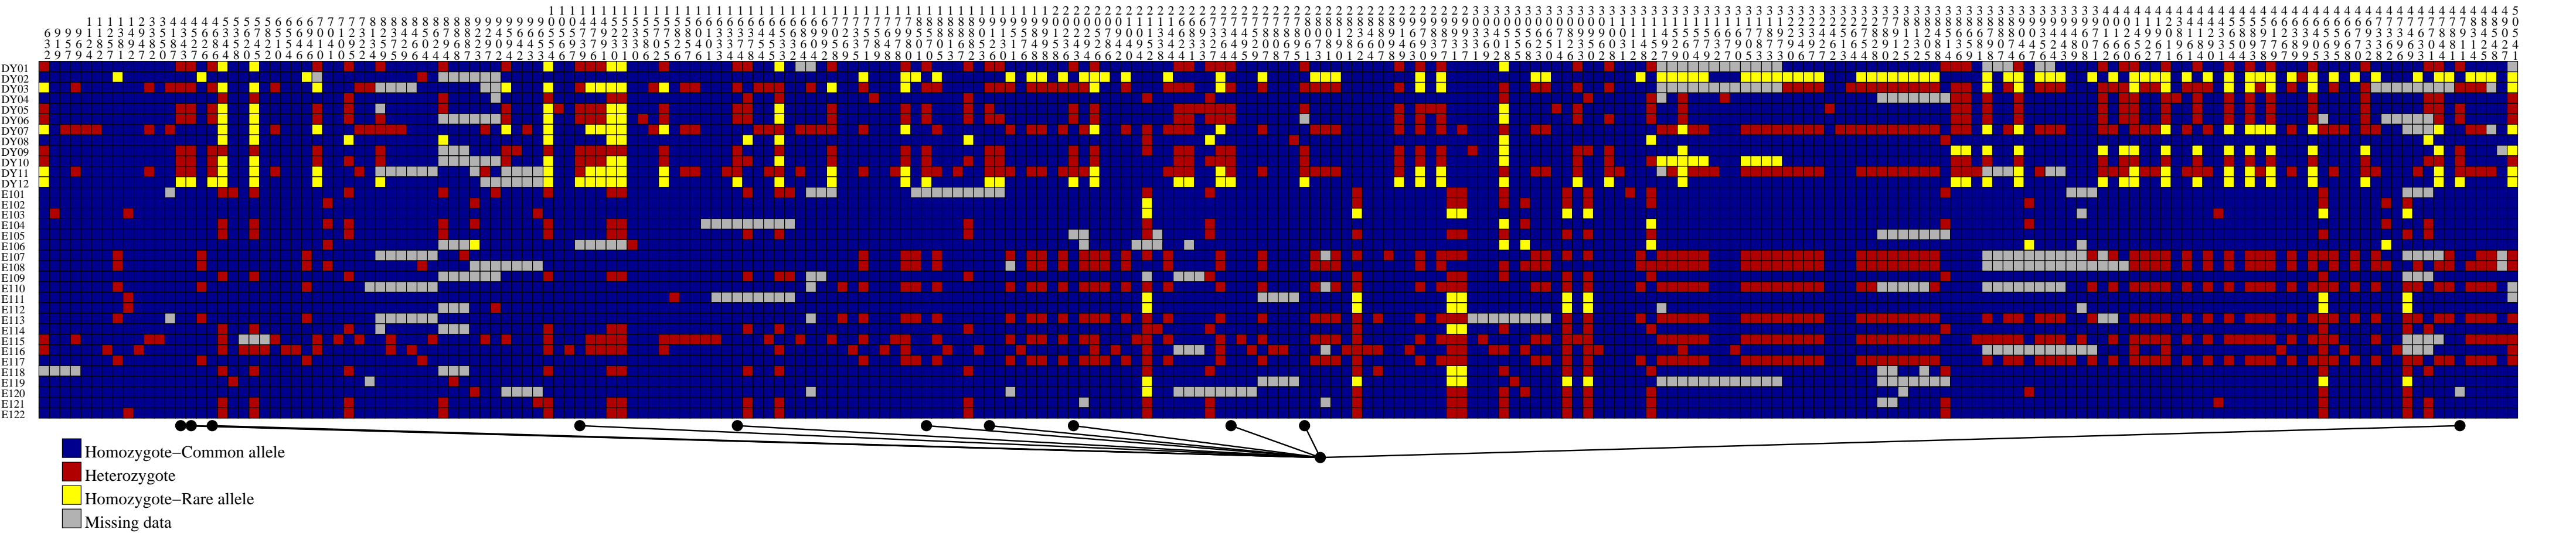

snca, p-value: 0.121

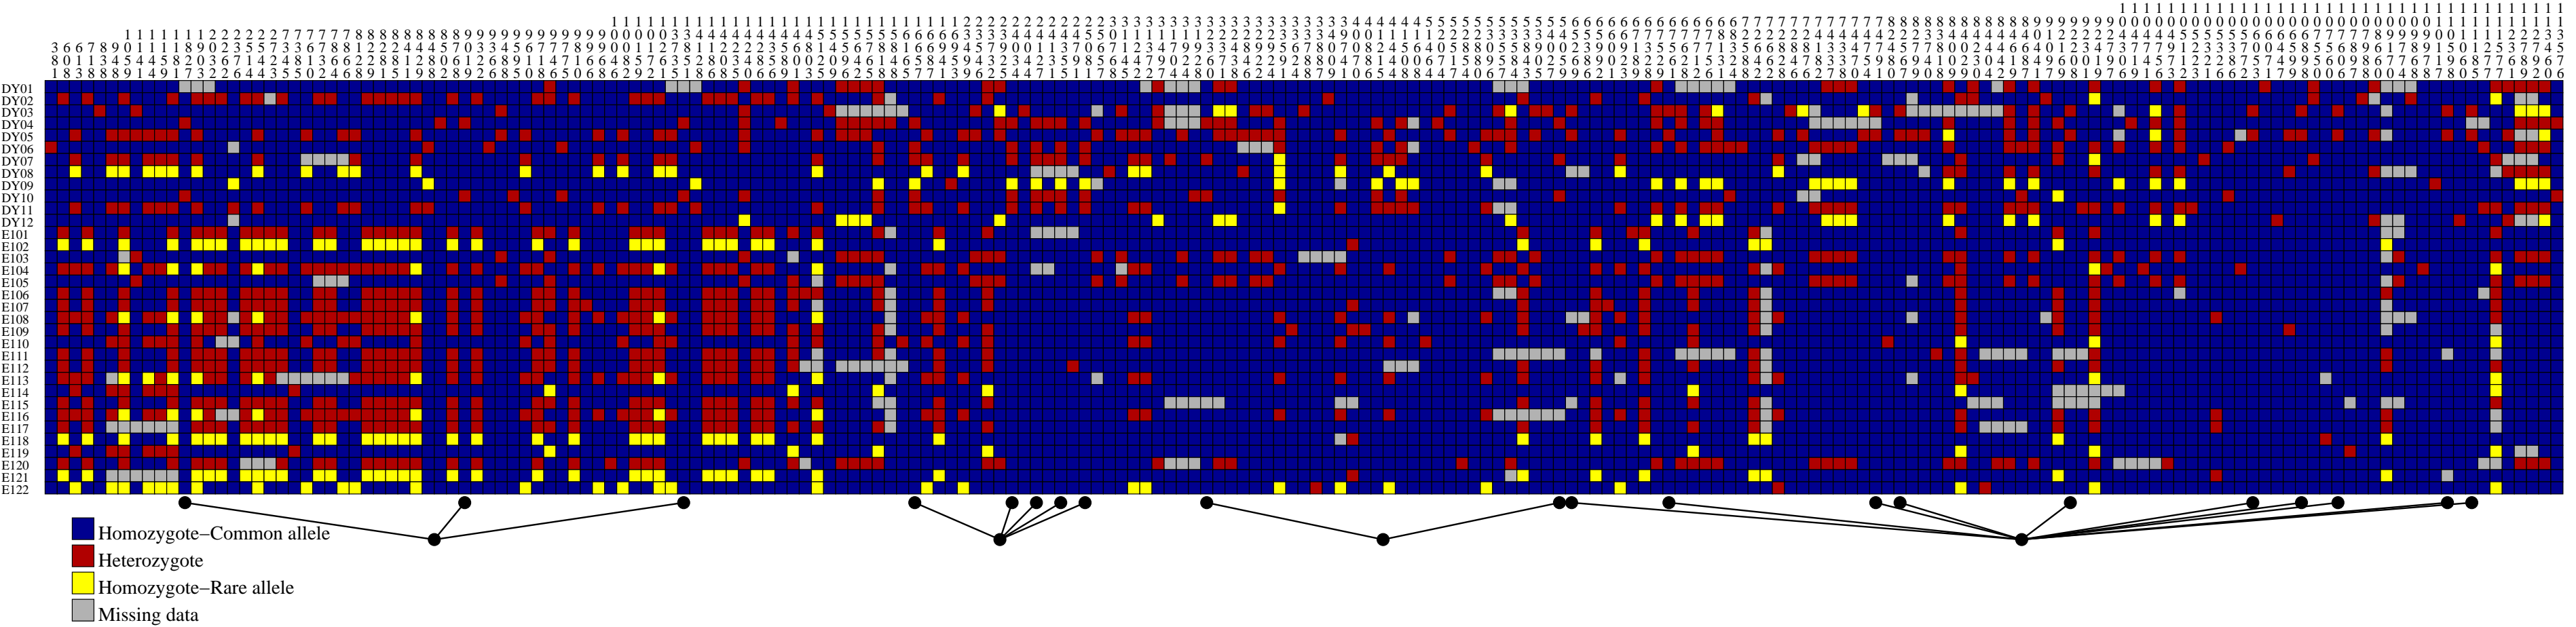

sphar, p-value: 0.145

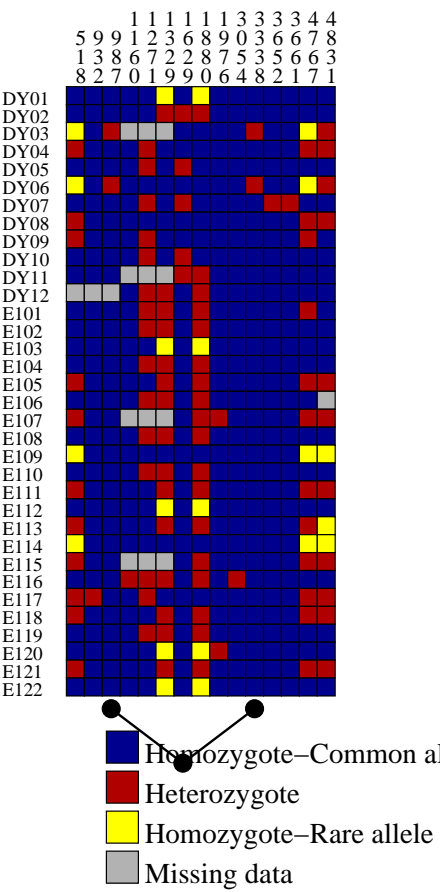



spr3, p-value: 0.1916

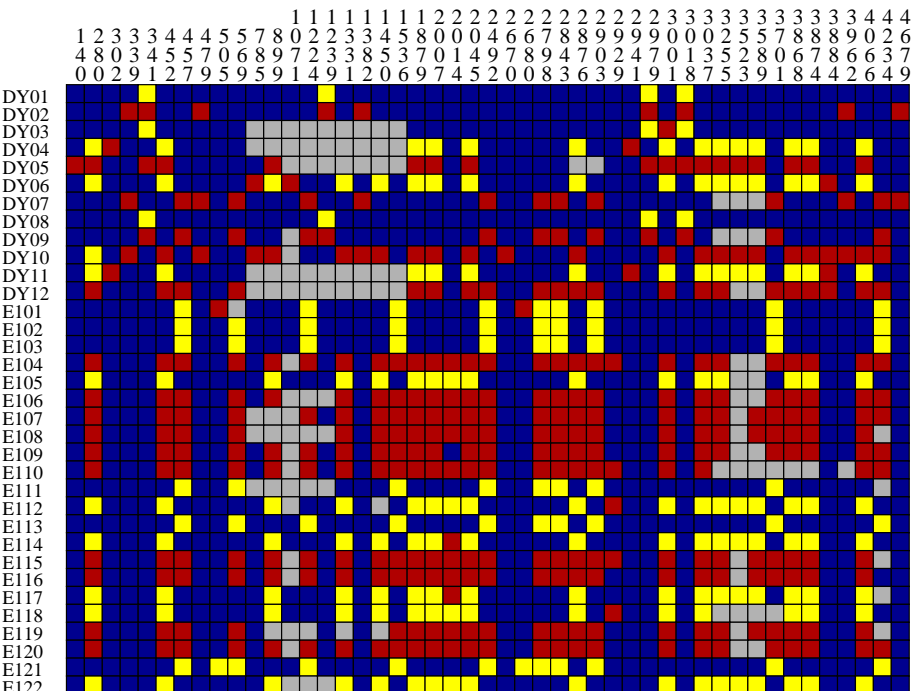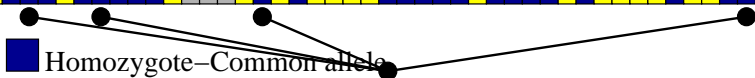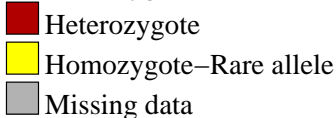

srd5a2, p-value: 0.8714

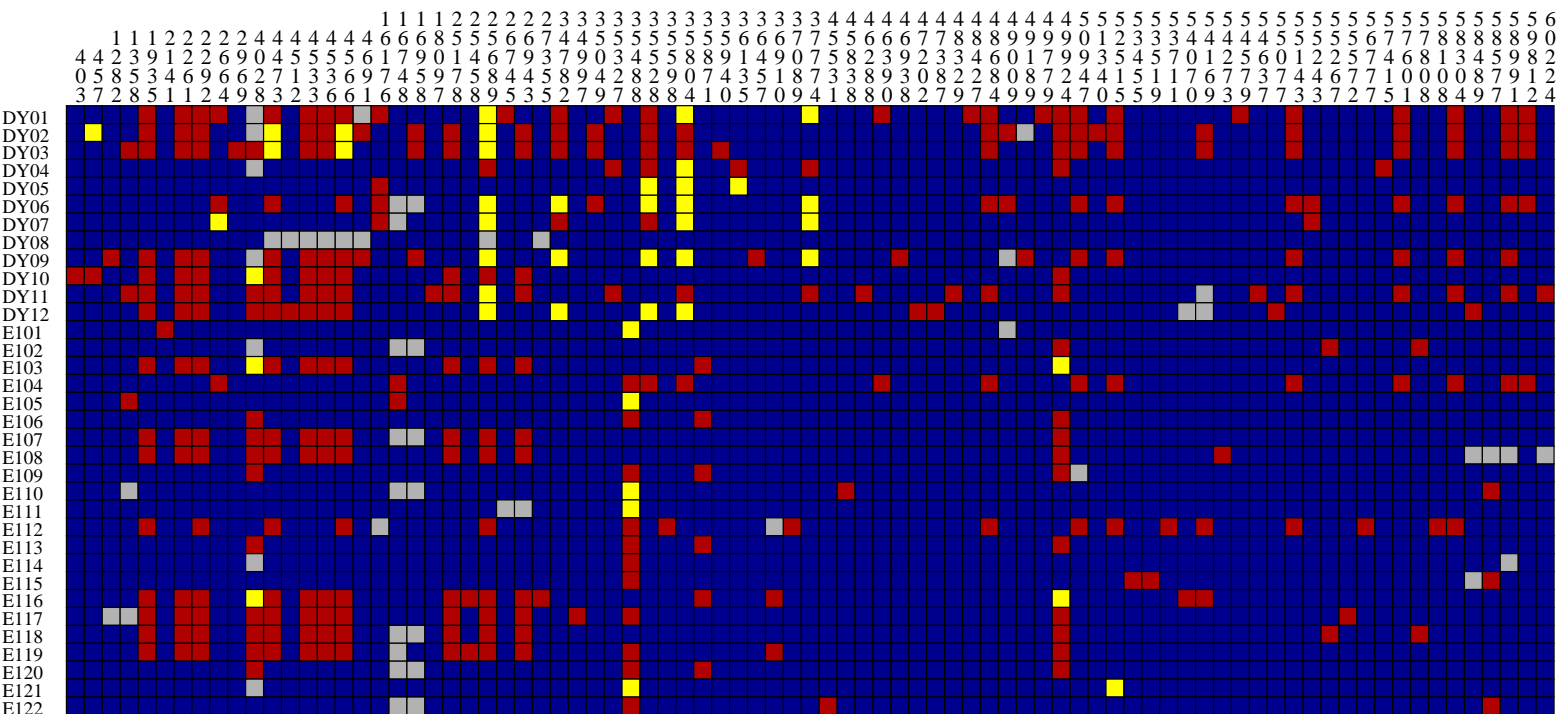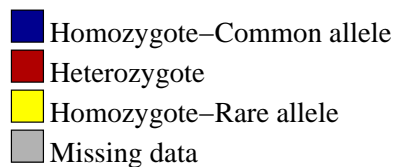

stk25, p-value: 0.386

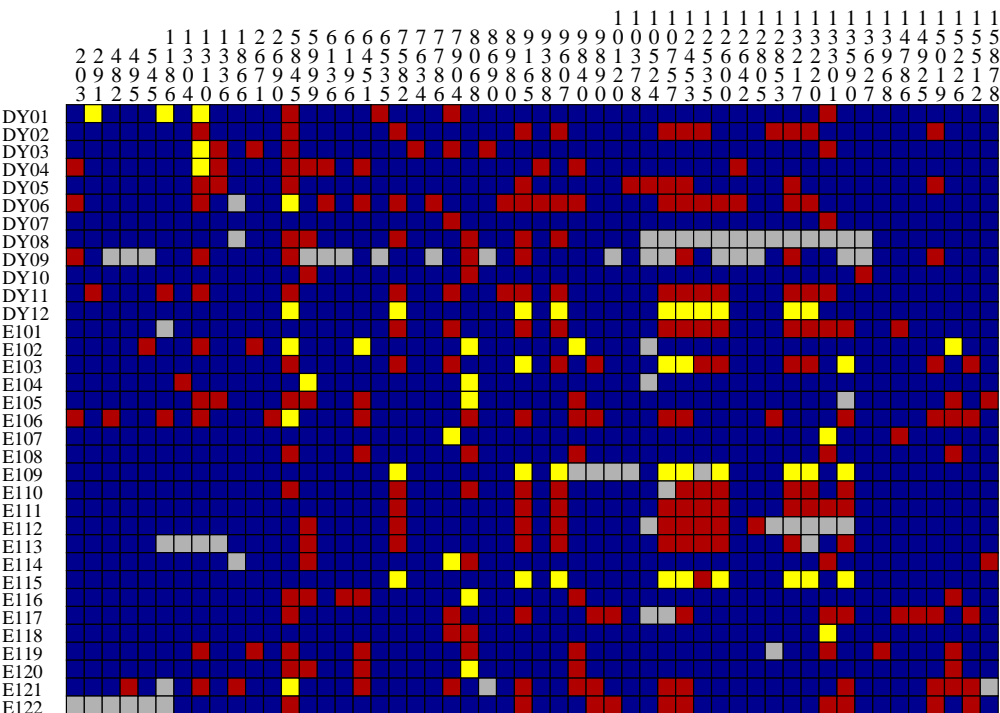

■ Homozygote-Common allele

■ Heterozygote

■ Homozygote-Rare allele

■ Missing data

[illegible]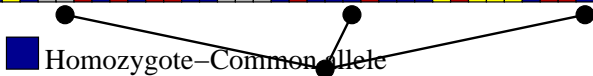

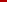 Heterozygote

■ Homozygote–Rare allele

Missing data

tert, p-value: 0.0252

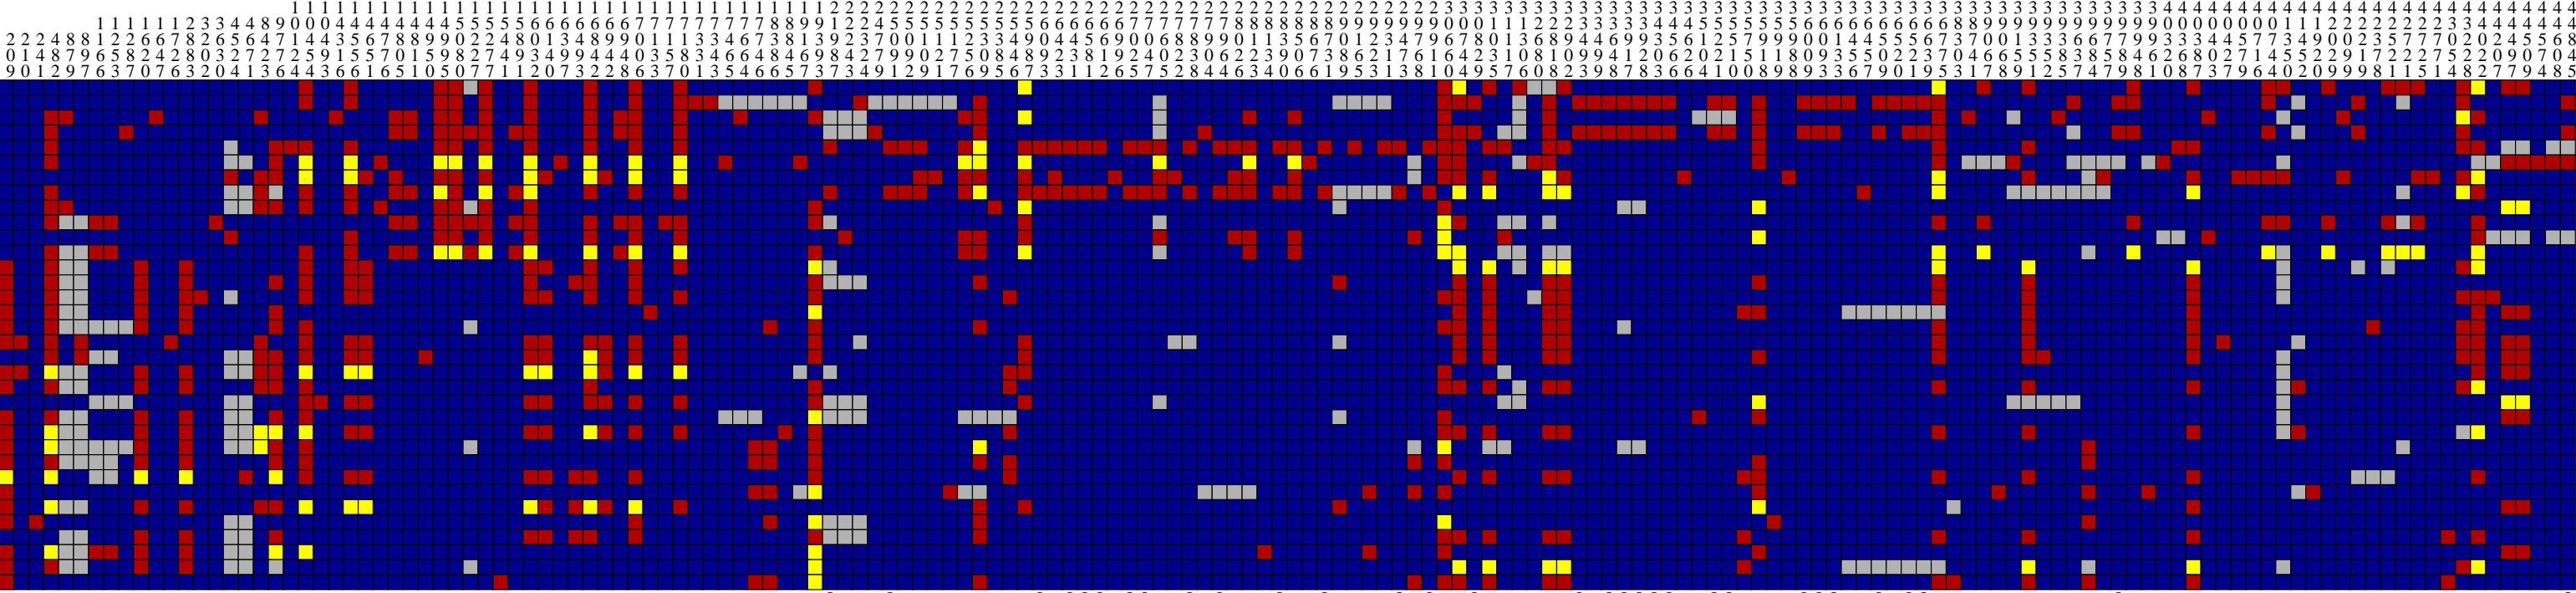

- Homozygote-Common allele
- Heterozygote
- Homozygote-Rare allele
- Missing data

tjp1, p-value: 0.0052

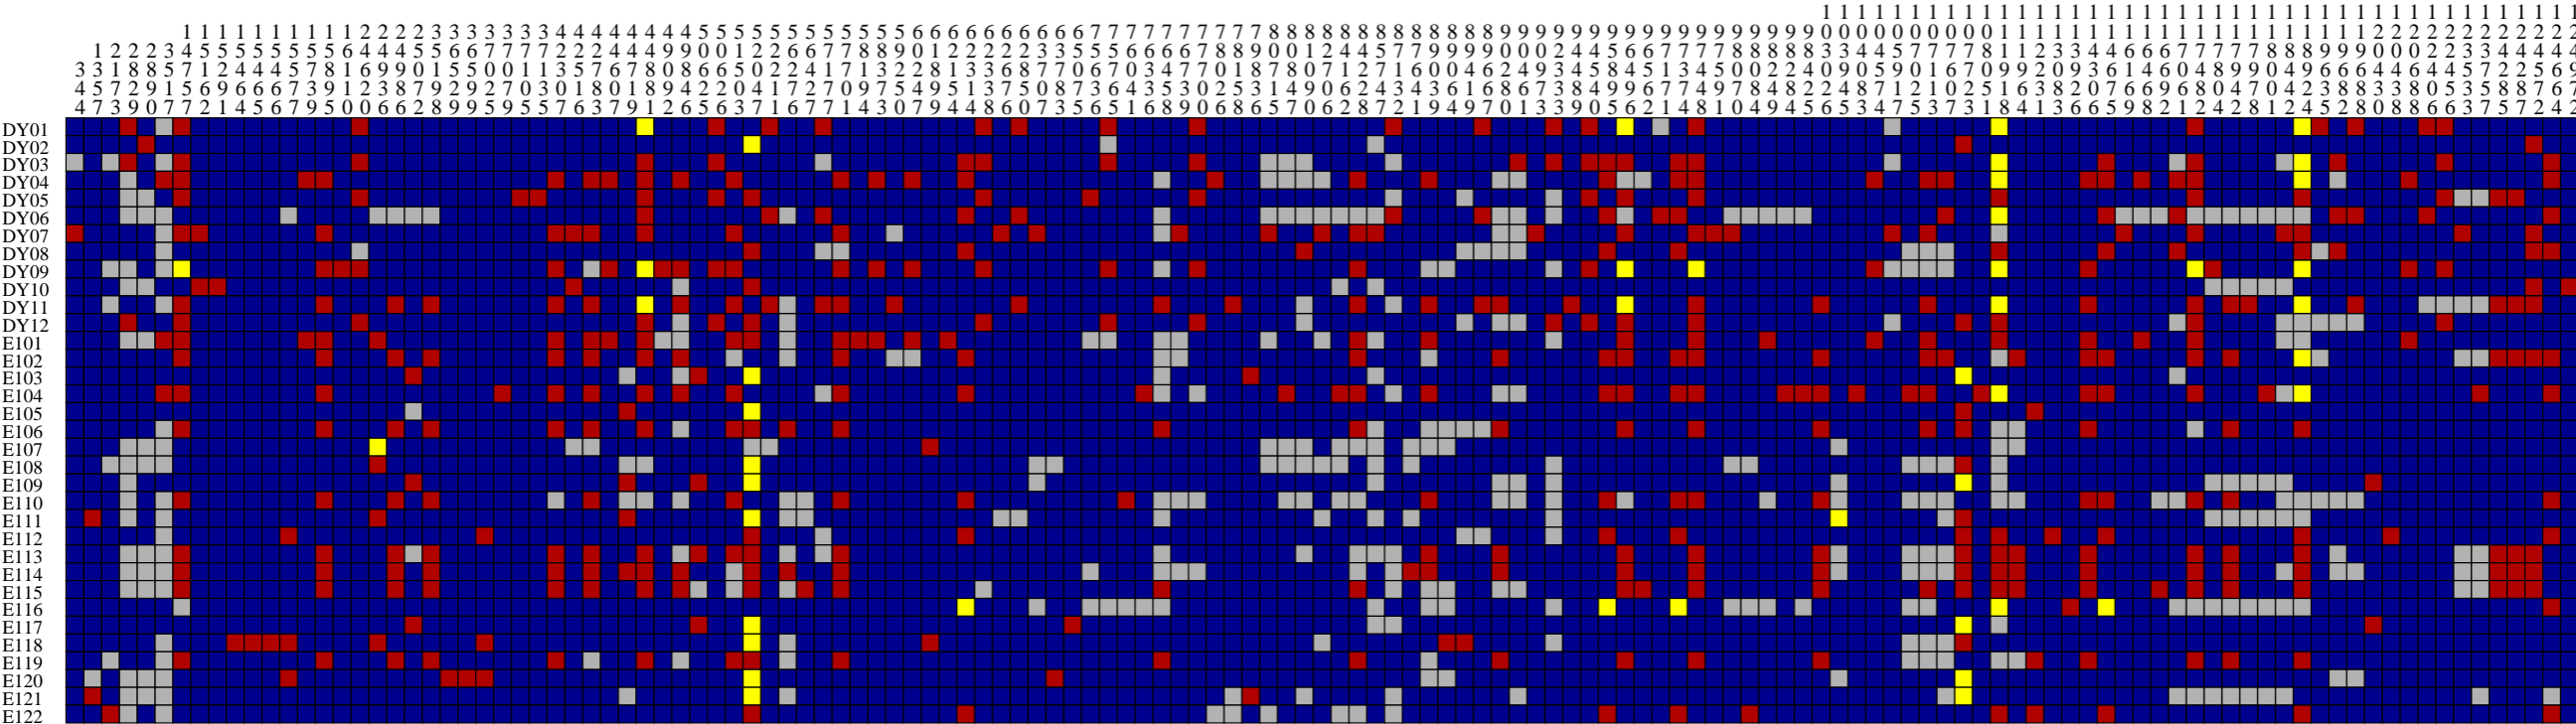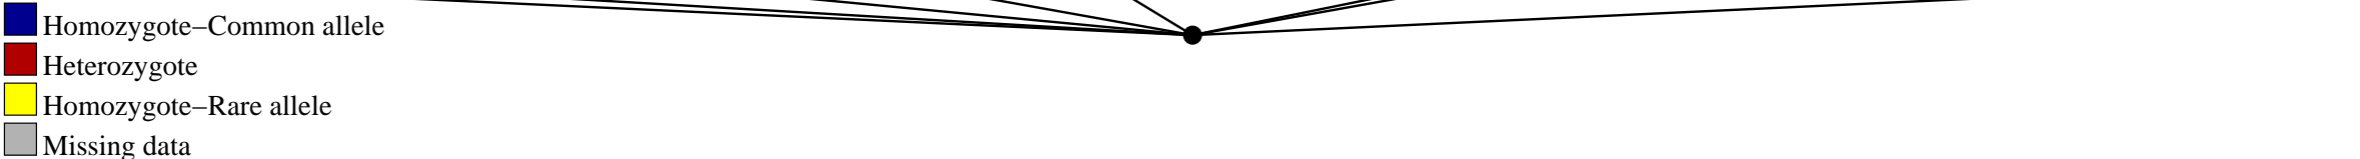

tnfrsf4, p-value: 0.4562

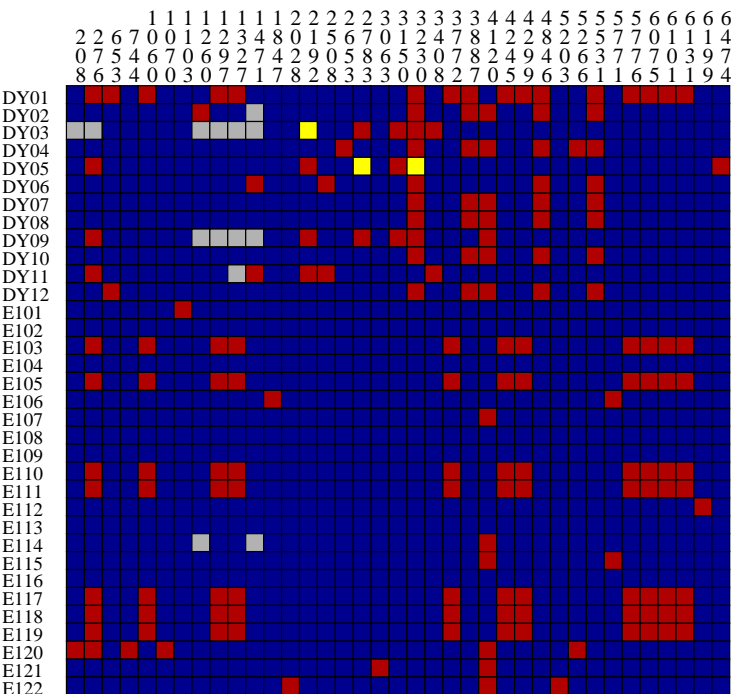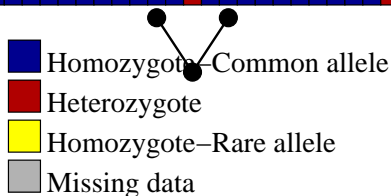

[illegible]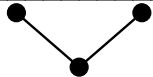

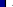 Homozygote–Common allele  
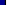 Heterozygote  
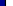 Homozygote–Rare allele  
 Missing data

tp53i3, p-value: 0.6318

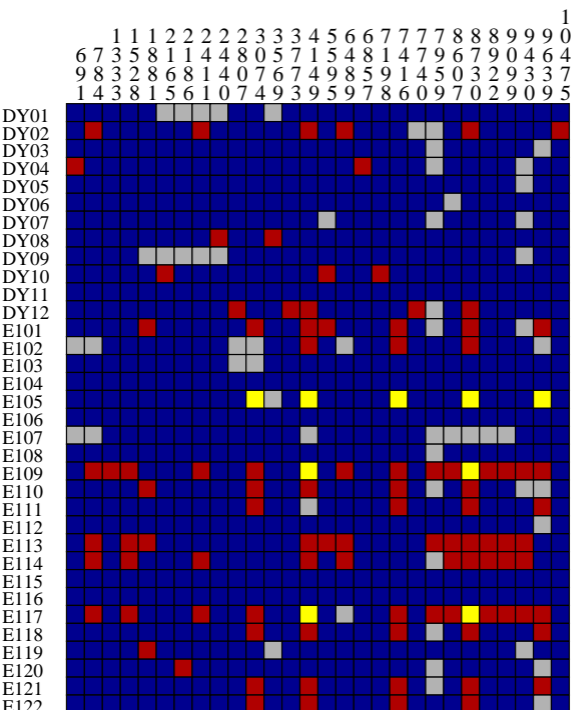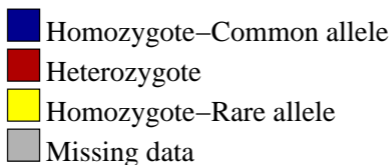

tpo, p-value: 0.0298

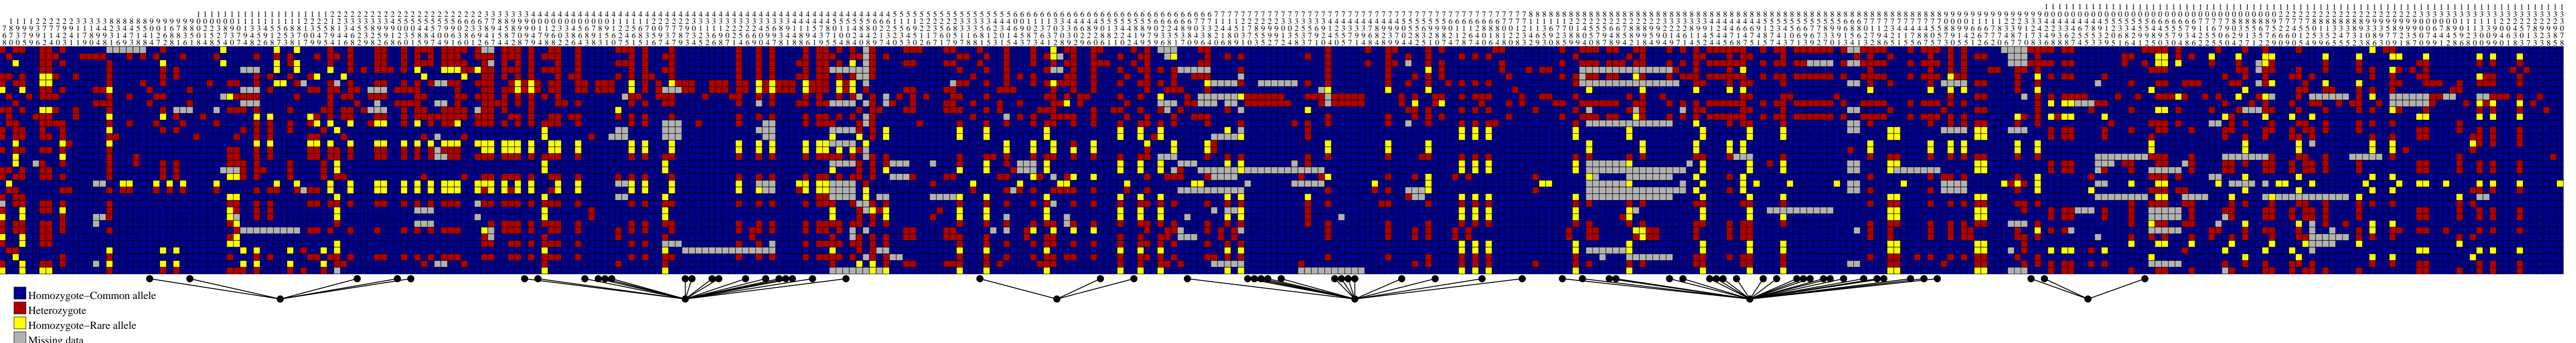

trpm2, p-value: 0.119

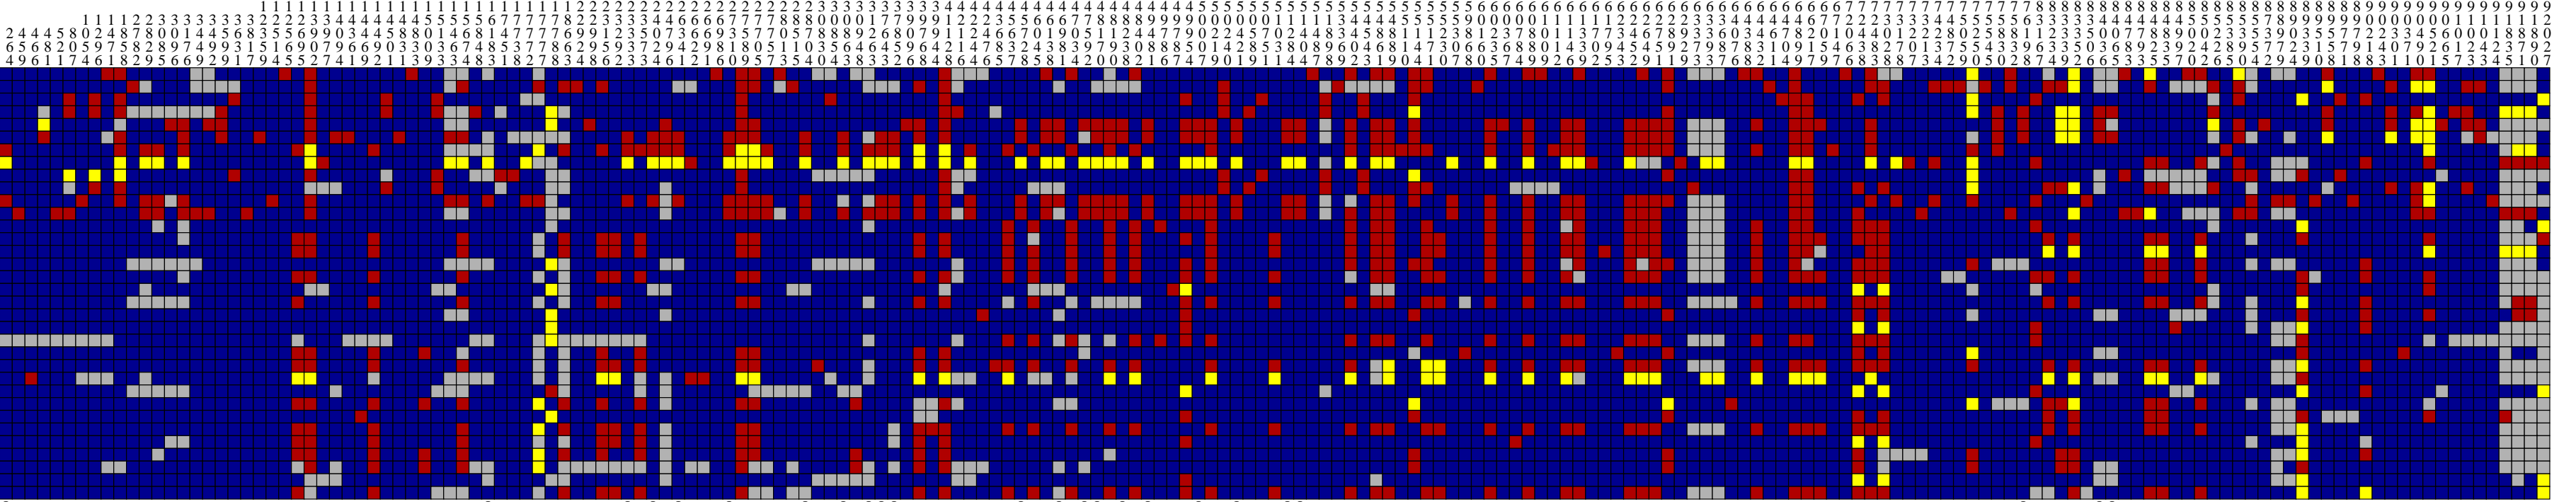

- Homozygote-Common allele
- Heterozygote
- Homozygote-Rare allele
- Missing data

tuba1, p-value: 0.083

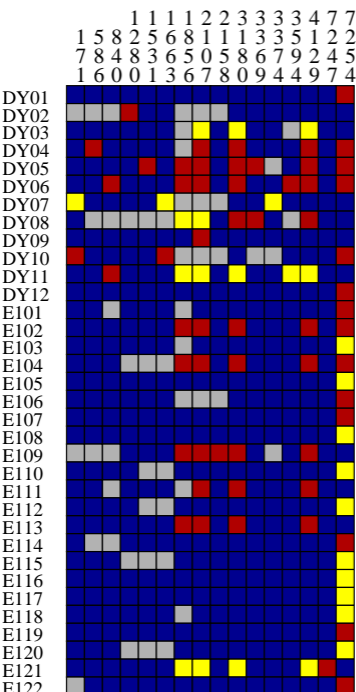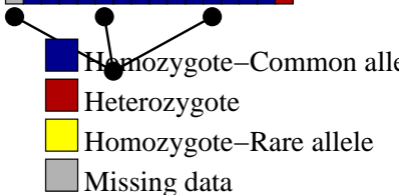

txnr1, p-value: 0.1626

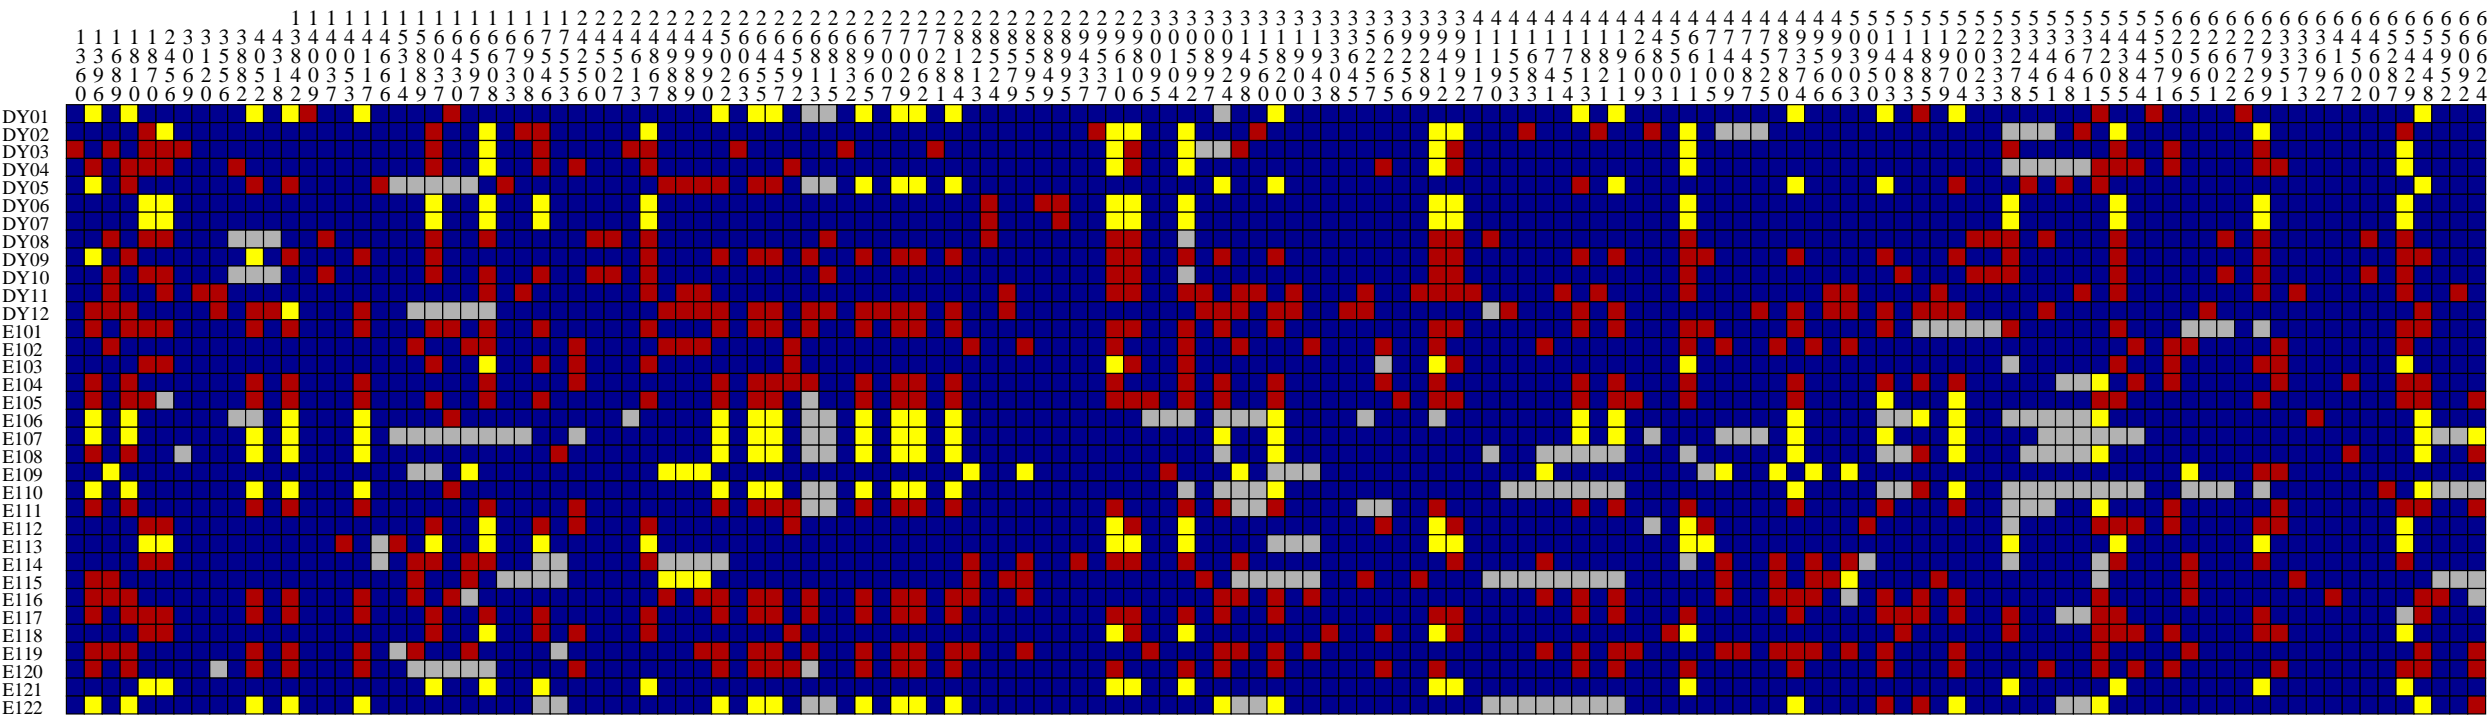

- Homozygote-Common allele
- Heterozygote
- Homozygote-Rare allele
- Missing data

ube2b, p-value: 0.3612

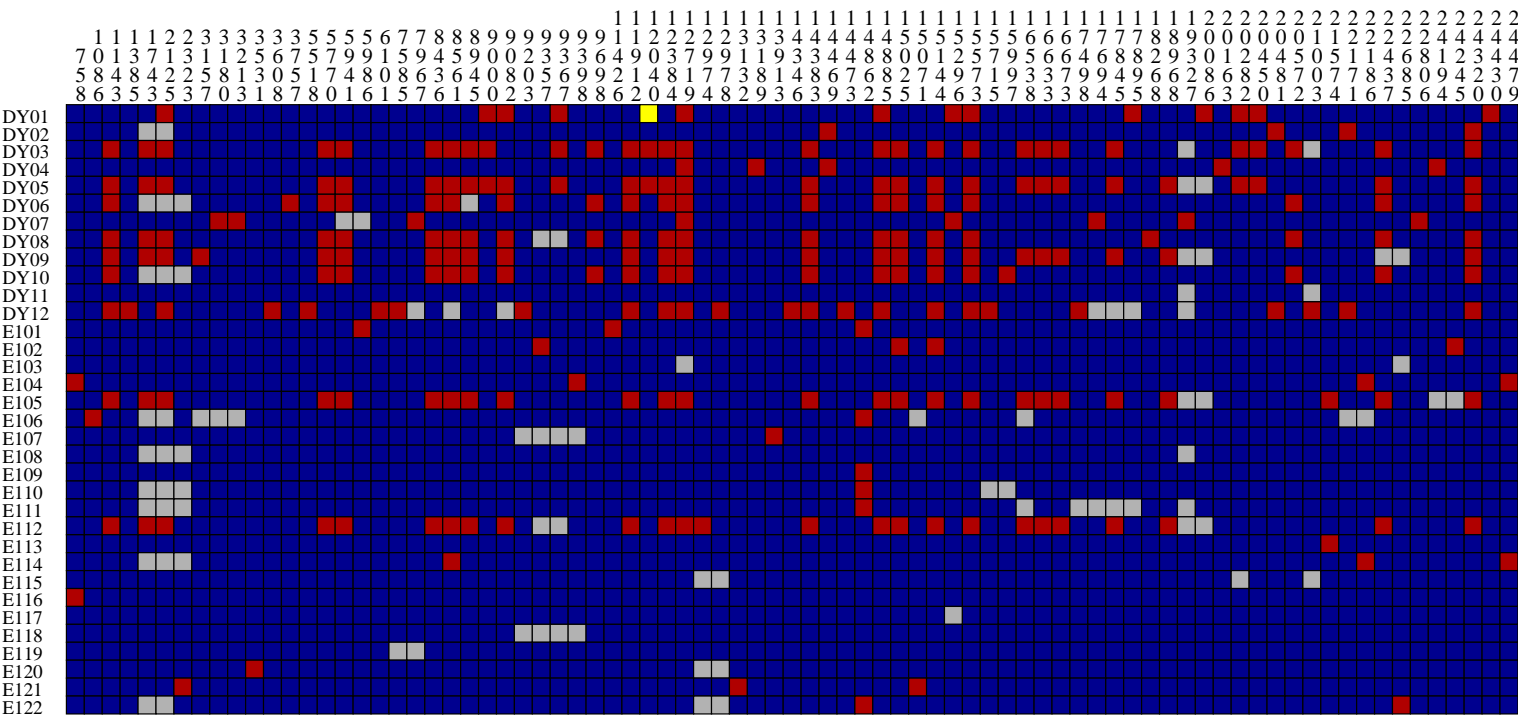

- Homozygote-Common allele
- Heterozygote
- Homozygote-Rare allele
- Missing data

ube2v2, p-value: 0.3388

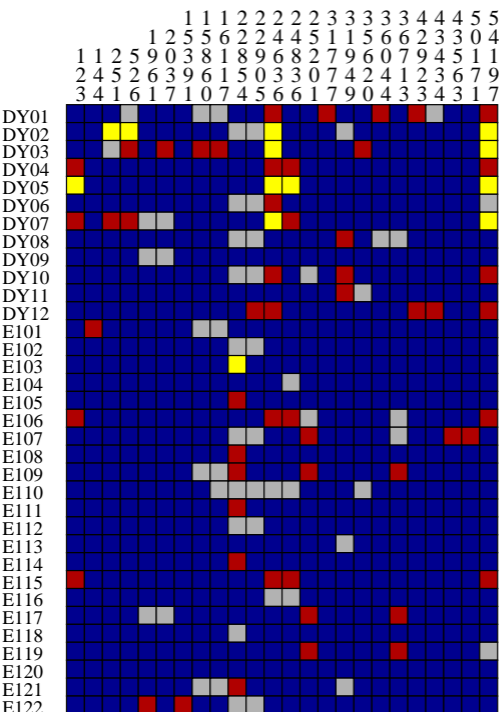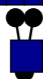

Homozygote-Common allele

Heterozygote

Homozygote-Rare allele

Missing data

ucp2, p-value: 0.4298

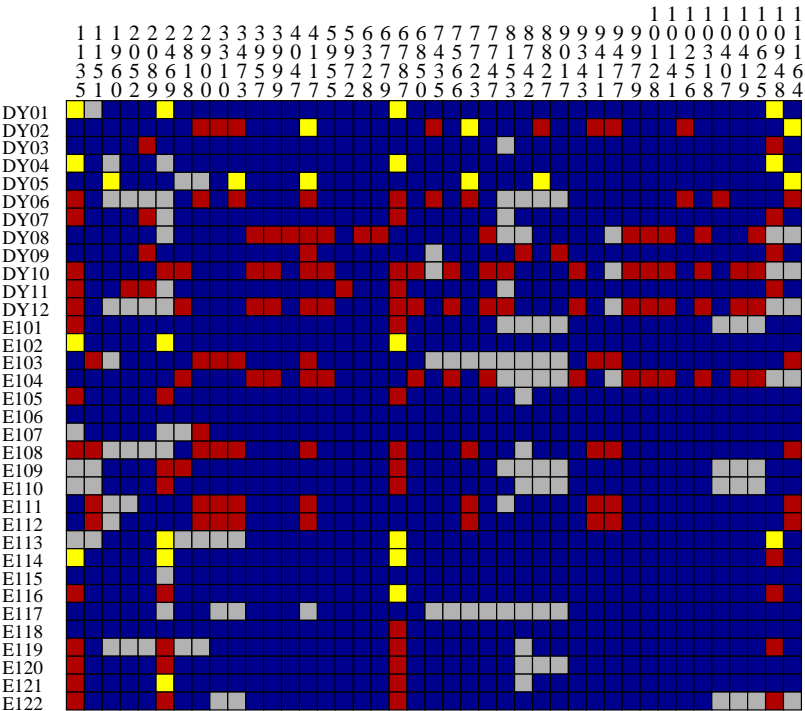

- Homozygote-Common allele
- Heterozygote
- Homozygote-Rare allele
- Missing data

vnn1, p-value: 0.136

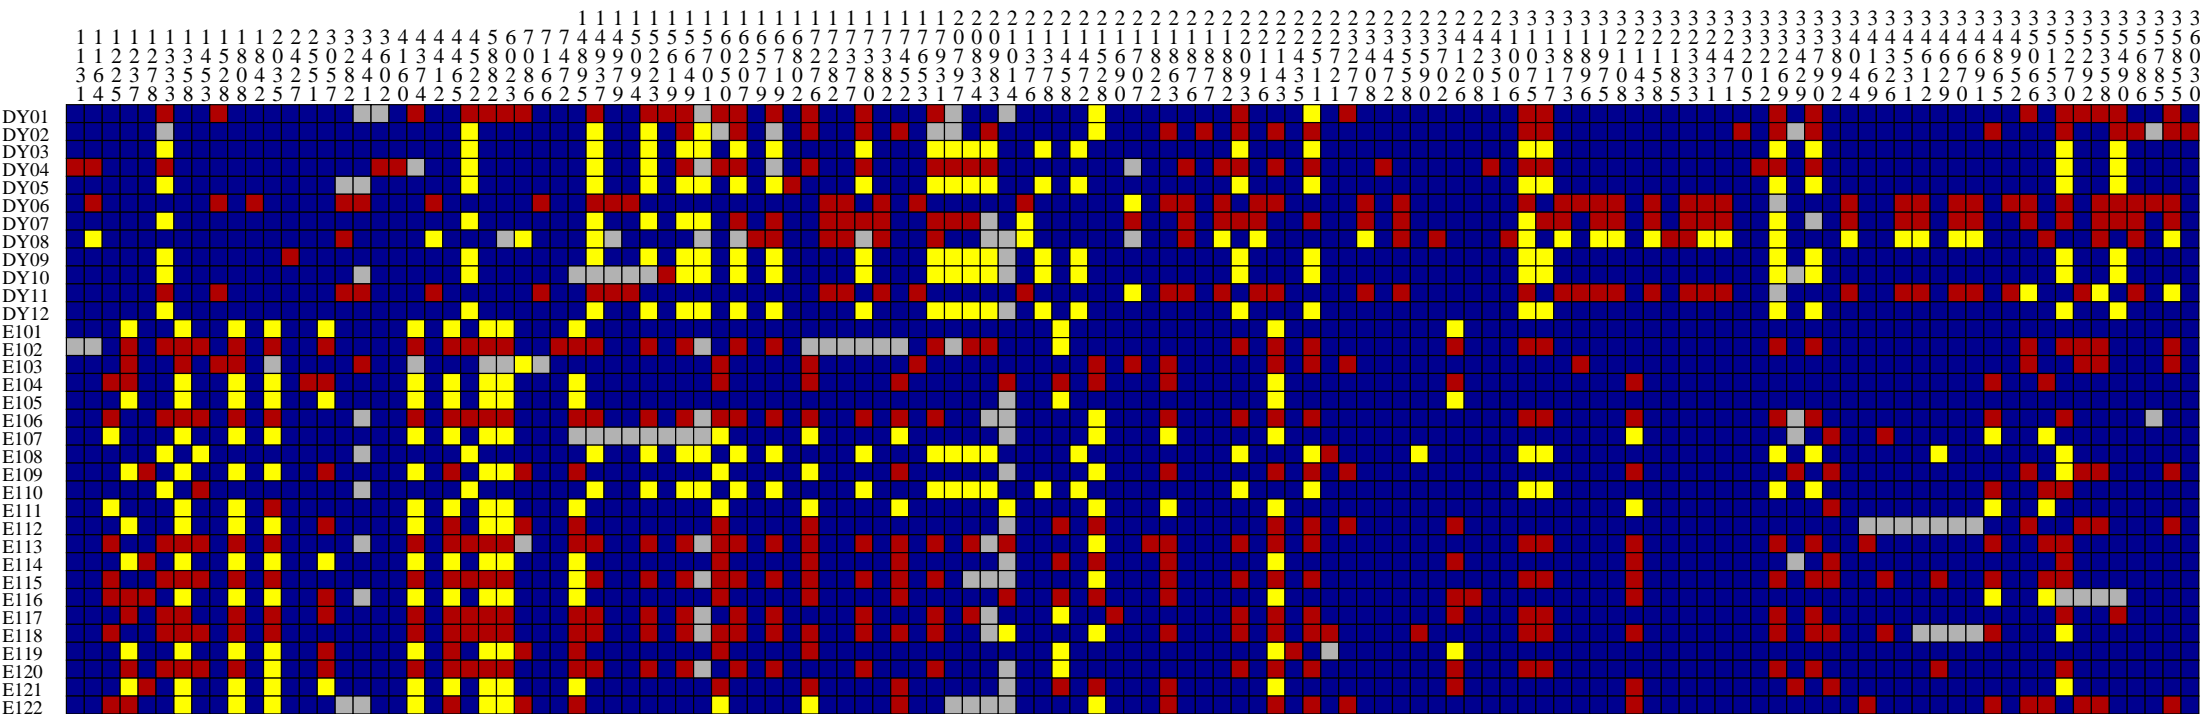

 Homozygote–Common allele  
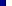 Heterozygote  
 Homozygote–Rare allele  
 Missing data

vnn2, p-value: 0.379

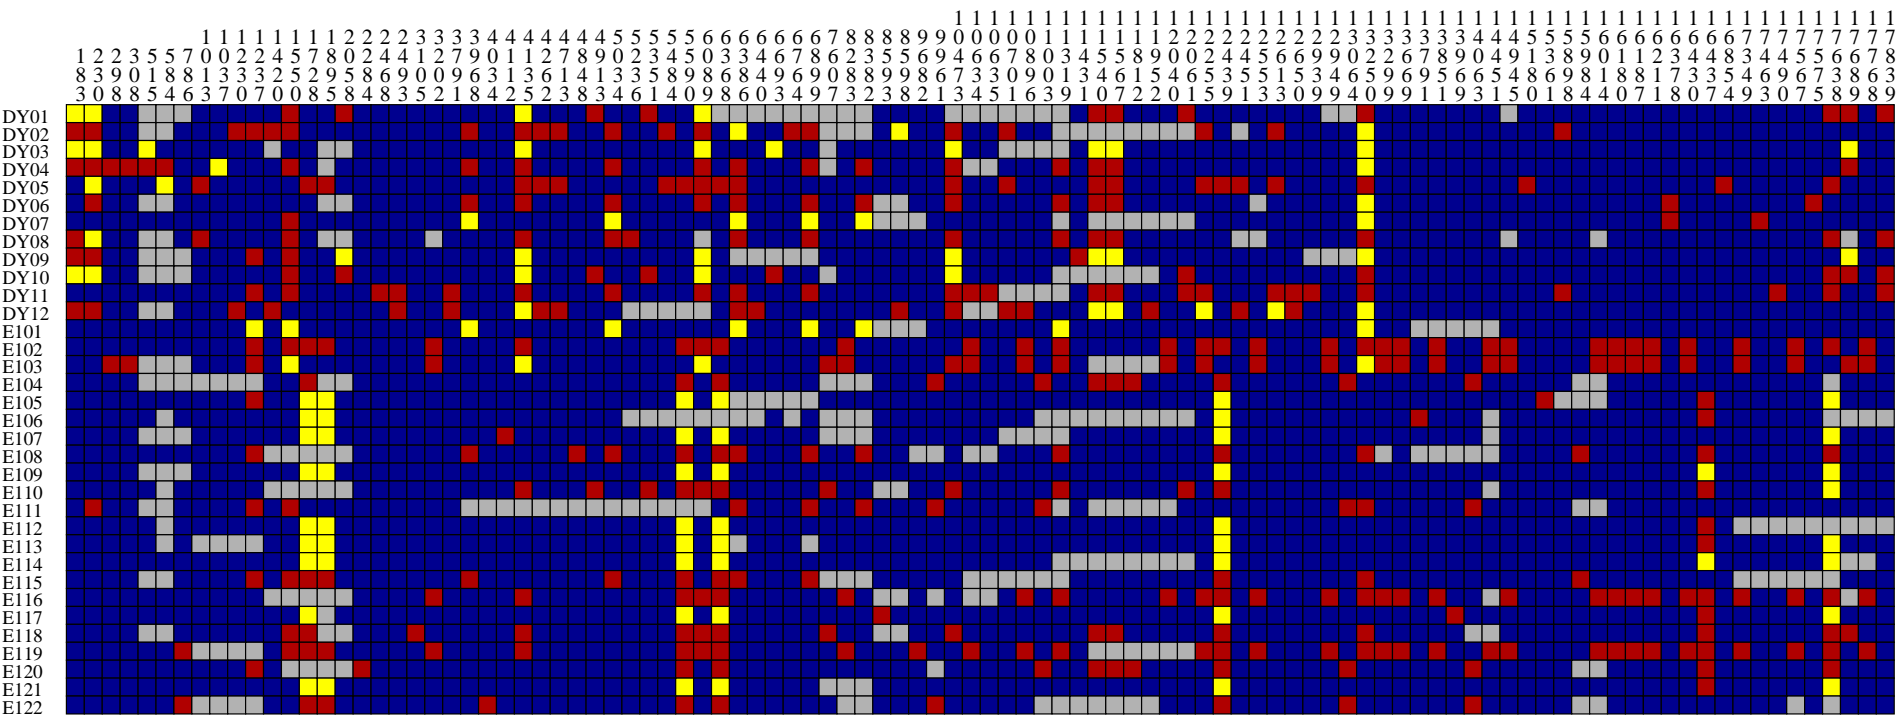

- Homozygote-Common allele
- Heterozygote
- Homozygote-Rare allele
- Missing data

vnn3, p-value: 0.3248

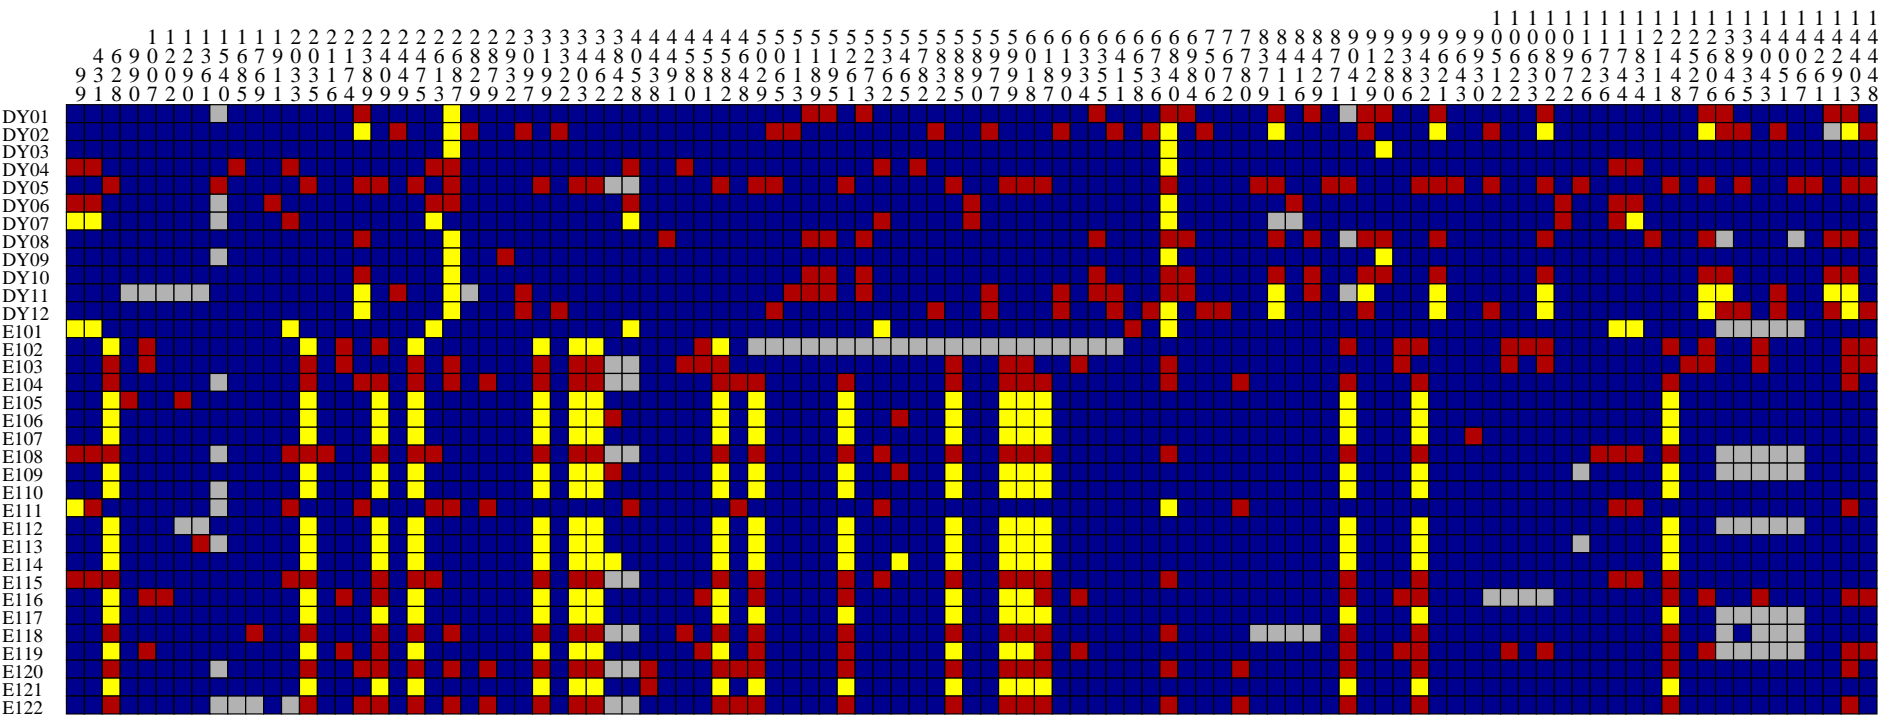

- Homozygote-Common allele
- Heterozygote
- Homozygote-Rare allele
- Missing data

x<sub>dh</sub>, p-value: 0.1856

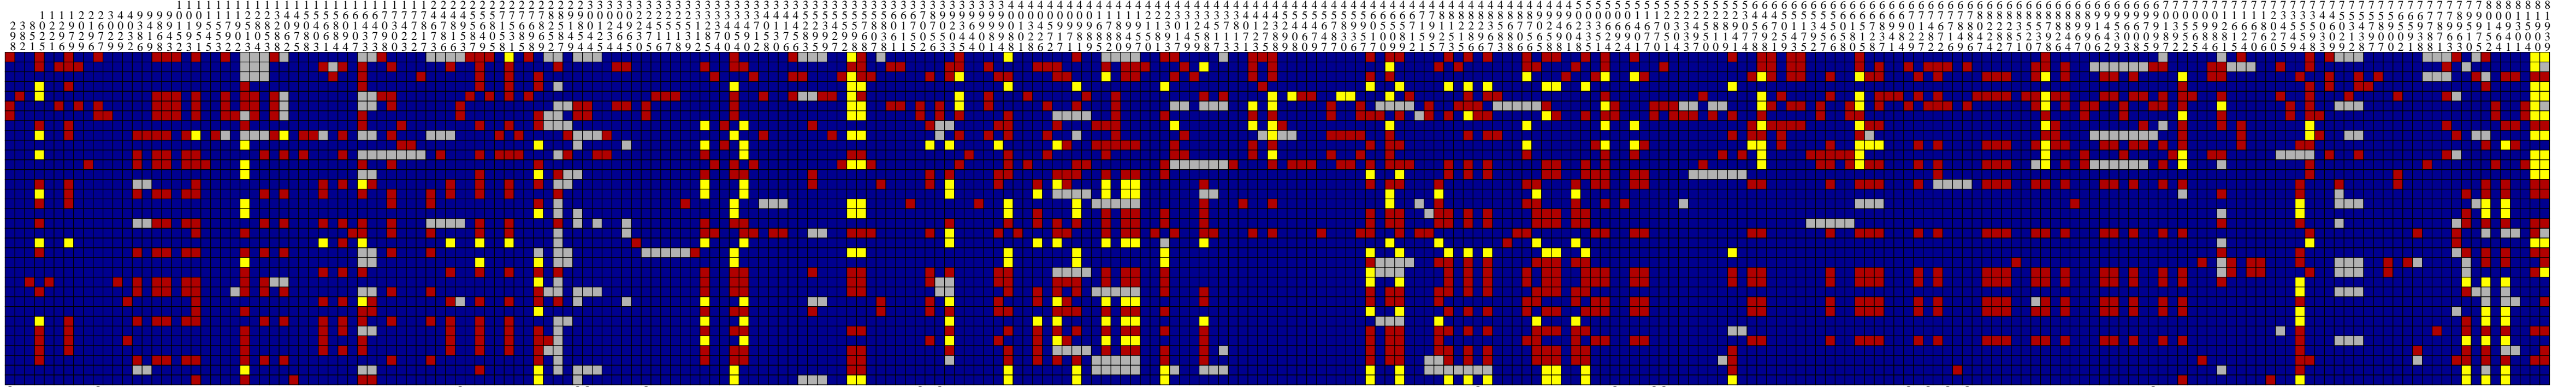

- Homozygote-Common allele
- Heterozygote
- Homozygote-Rare allele
- Missing data

xrcc4, p-value: 0.0012

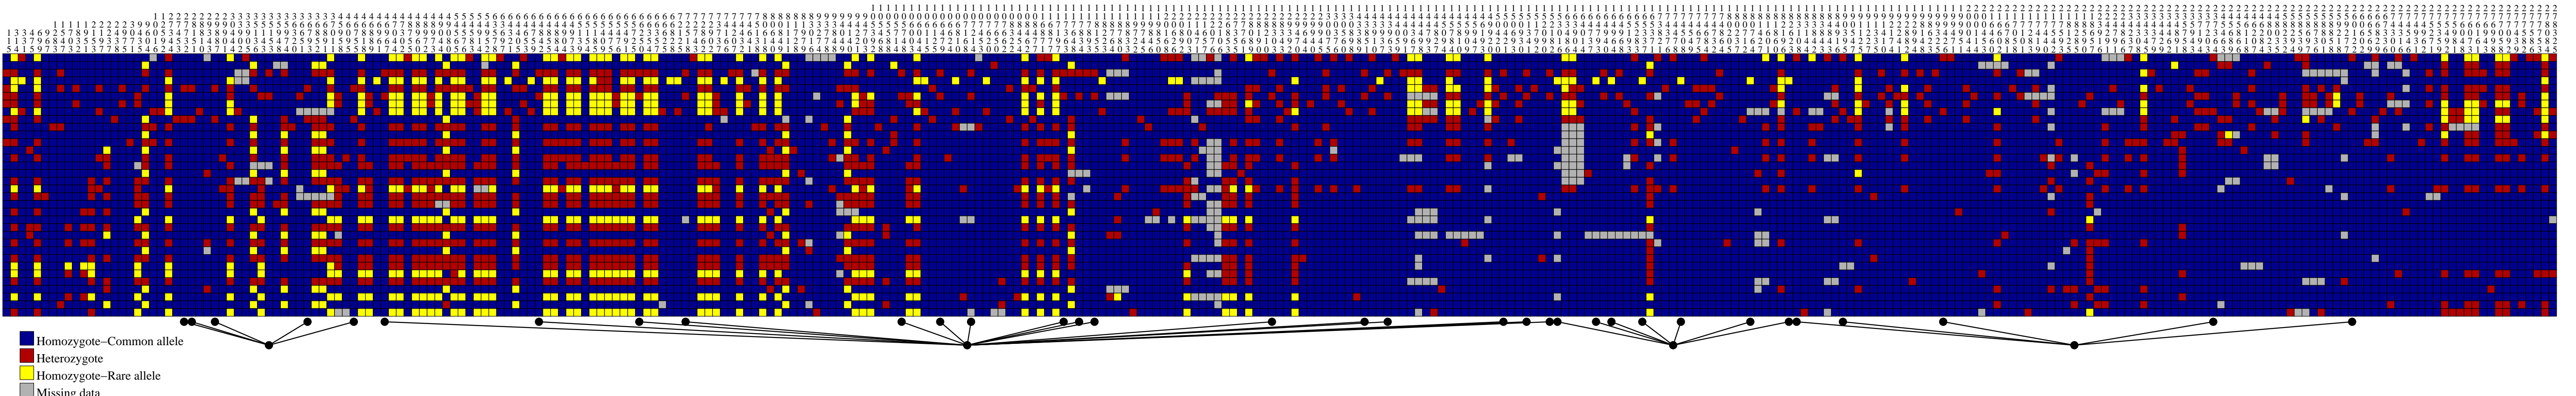

Supplement: Figure S6 — (2.8 MB PDF) [file pgen.0020105.sg006.pdf]
