# Supplementary material for: Possible Ancestral Structure in Human Populations
Source: PubMed Central journal article supplement (PMC1523253; doi:10.1371/journal.pgen.0020105), 2006-07-28
Supplement: pgen.0020105.sg002.pdf [file pgen.0020105.sg002.pdf]

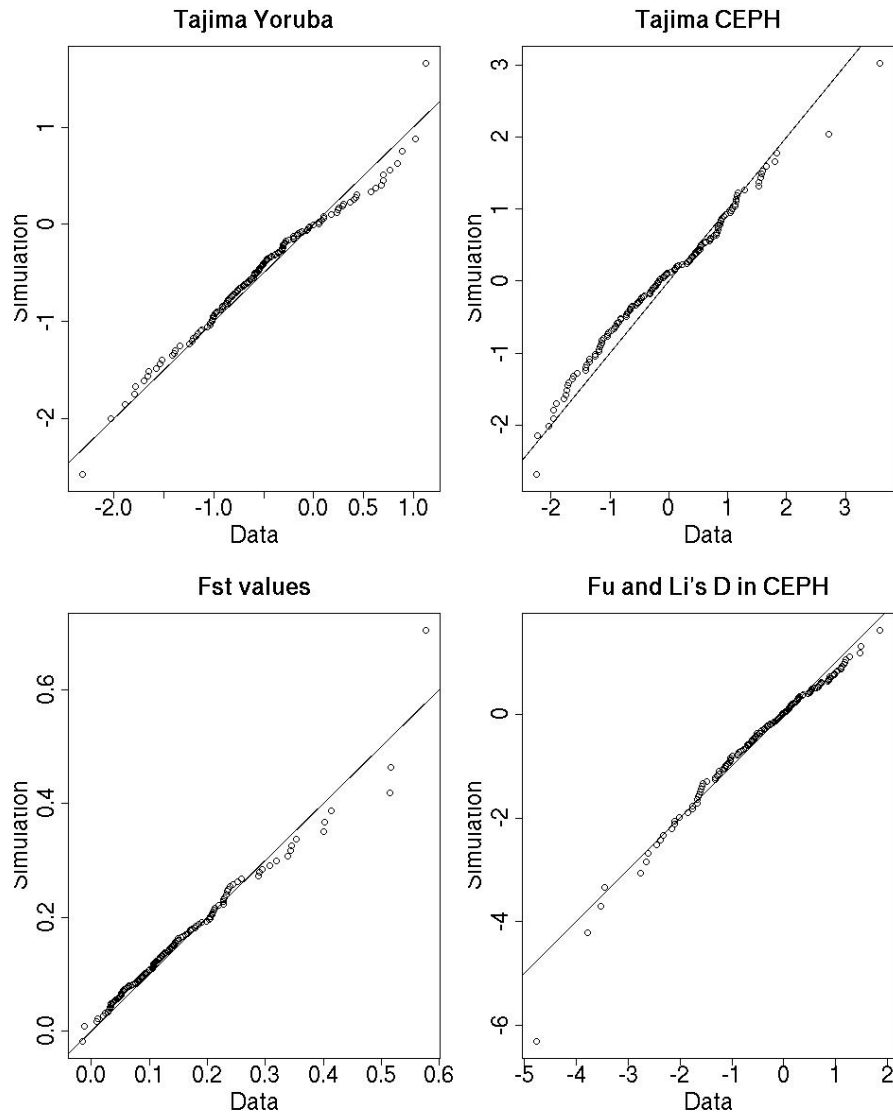

Figure 1: Quantile-quantile plot between simulated and observed values for the first set of summary statistics used in the inference procedure: Tajima's  $D$  in the CEPH sample (top-left graph), Tajima's  $D$  in the Yoruba (top-right graph) sample, Fu and Li's  $D^*$  in CEPH (bottom right) and  $F_{ST}$  (bottom left).
