# Supplementary material for: Possible Ancestral Structure in Human Populations
Source: PubMed Central journal article supplement (PMC1523253; doi:10.1371/journal.pgen.0020105), 2006-07-28
Supplement: pgen.0020105.sg004.pdf [file pgen.0020105.sg004.pdf]

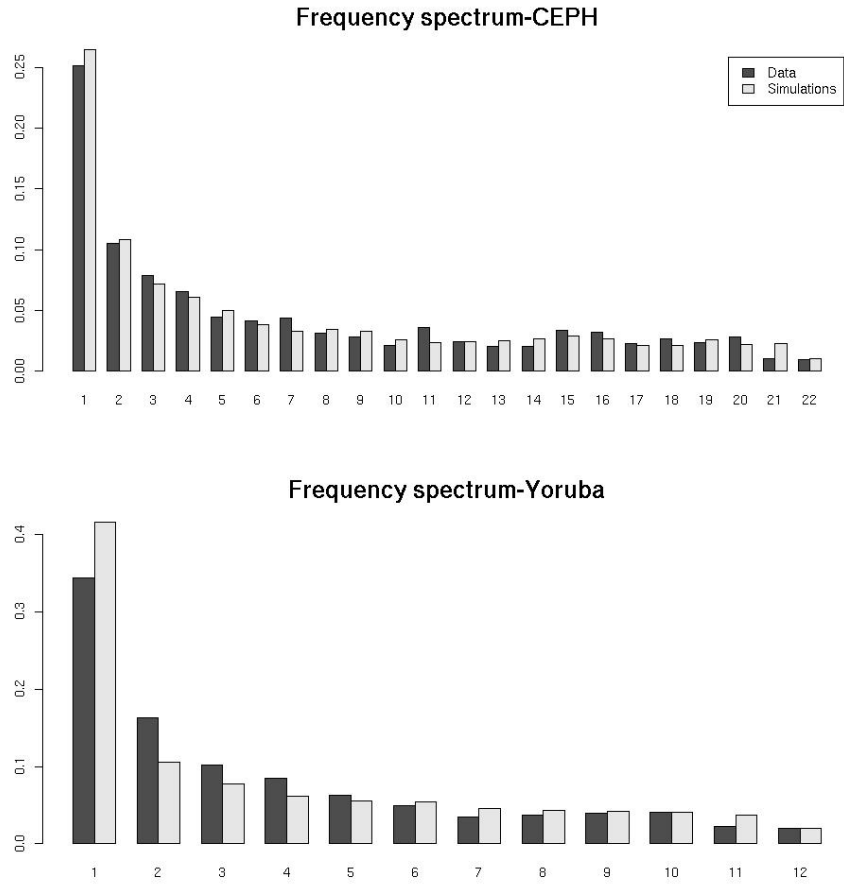

Figure 1: Frequency spectrum (European and Yoruba sample) in the data and for the best-fitting scenario (here with an admixture rate of 3%). Our best fitting scenario generates an excess of singletons in the Yoruba sample.
