# Supplementary material for: Possible Ancestral Structure in Human Populations
Source: PubMed Central journal article supplement (PMC1523253; doi:10.1371/journal.pgen.0020105), 2006-07-28
Supplement: pgen.0020105.st001.pdf [file pgen.0020105.st001.pdf]

## CEPH

| Name    | p-value | Function                                                                                        |
|---------|---------|-------------------------------------------------------------------------------------------------|
| rrm2b   | 0.0018  | Ribonucleotide reductase M2 B (TP53 inducible)                                                  |
| tp53bp1 | 0.0026  | Tumor protein p53 binding protein, 1                                                            |
| rpa3    | 0.0052  | Replication protein A3, 14kDa                                                                   |
| oxr1    | 0.0094  | Oxidation resistance 1                                                                          |
| tp53i3  | 0.0132  | Tumor protein p53 inducible protein 3                                                           |
| sepp1   | 0.014   | Selenoprotein P, plasma, 1                                                                      |
| vnn2    | 0.0162  | Vanin 2                                                                                         |
| birc2   | 0.0178  | Baculoviral IAP repeat-containing 2                                                             |
| fdxr    | 0.0266  | Ferredoxin reductase                                                                            |
| gsta4   | 0.0294  | Glutathione S-transferase A4                                                                    |
| scara3  | 0.0322  | Scavenger receptor class A, member 3                                                            |
| fgf5    | 0.0332  | Fibroblast growth factor 5                                                                      |
| adh1c   | 0.0346  | Alcohol dehydrogenase 1C (class I), gamma polypeptide                                           |
| rad18   | 0.0362  | RAD18 homolog ( <i>S. cerevisiae</i> )                                                          |
| chrna4  | 0.0388  | Cholinergic receptor, nicotinic, alpha polypeptide 4                                            |
| adh1b   | 0.04    | Alcohol dehydrogenase IB (class I), beta polypeptide                                            |
| fmo5    | 0.0404  | Flavin containing monooxygenase 5                                                               |
| adh5    | 0.0404  | Alcohol dehydrogenase 5 (class III), chi polypeptide                                            |
| odc1    | 0.0416  | Ornithine decarboxylase 1                                                                       |
| adh6    | 0.042   | Alcohol dehydrogenase 6 (class V)                                                               |
| mmp9    | 0.0422  | Matrix metalloproteinase 9 (gelatinase B, 92kDa gelatinase, 92kDa type IV collagenase)          |
| txnrd1  | 0.044   | Thioredoxin reductase 1                                                                         |
| abl2    | 0.045   | V-abl Abelson murine leukemia viral oncogene homolog 2 (arg, Abelson-related gene)              |
| cyp1a2  | 0.0486  | Cytochrome P450, family 1, subfamily A, polypeptide 2                                           |
| mmp12   | 0.0508  | Matrix metalloproteinase 12 (macrophage elastase)                                               |
| polm    | 0.055   | Polymerase (DNA directed), mu                                                                   |
| vnn3    | 0.06    | Vanin 3                                                                                         |
| csk     | 0.0644  | C-src tyrosine kinase                                                                           |
| adh1a   | 0.0646  | Alcohol dehydrogenase 1A (class I), alpha polypeptide                                           |
| mad2l2  | 0.0736  | MAD2 mitotic arrest deficient-like 2 (yeast)                                                    |
| mmp8    | 0.0828  | Matrix metalloproteinase 8 (neutrophil collagenase)                                             |
| bace1   | 0.0914  | Beta-site APP-cleaving enzyme 1                                                                 |
| fmo3    | 0.0946  | Flavin containing monooxygenase 3                                                               |
| ube2v2  | 0.1038  | Ubiquitin-conjugating enzyme E2 variant 2                                                       |
| ppib    | 0.1044  | Peptidylprolyl isomerase B (cyclophilin B)                                                      |
| tpo     | 0.1076  | Thyroid peroxidase                                                                              |
| nudt1   | 0.11    | Nudix (nucleoside diphosphate linked moiety X)-type motif 1                                     |
| foxm1   | 0.1108  | Forkhead box M1                                                                                 |
| gpx6    | 0.1118  | Glutathione peroxidase 6 (olfactory)                                                            |
| mb      | 0.1122  | Myoglobin                                                                                       |
| app     | 0.1276  | Amyloid beta (A4) precursor protein (protease nexin-II, Alzheimer disease)                      |
| mmp16   | 0.144   | Matrix metalloproteinase 16 (membrane-inserted)                                                 |
| dclre1b | 0.1512  | DNA cross-link repair 1B (PSO2 homolog, <i>S. cerevisiae</i> )                                  |
| fbp1    | 0.1858  | Fructose-1,6-bisphosphatase 1                                                                   |
| pax3    | 0.1876  | Paired box gene 3 (Waardenburg syndrome 1)                                                      |
| prdx5   | 0.1878  | Peroxiredoxin 5                                                                                 |
| xrcc4   | 0.2016  | X-ray repair complementing defective repair in Chinese hamster cells 4                          |
| slc4a2  | 0.221   | Solute carrier family 4, anion exchanger, member 2 (erythrocyte membrane protein band 3-like 1) |
| ptch    | 0.2276  | Patched homolog ( <i>Drosophila</i> )                                                           |
| spr3    | 0.2414  | Small proline-rich protein 3                                                                    |

Table 1: List of most significant genes identified in the CEPH sample, ordered by p-values. 24 genes are significant at  $p < 0.05$  (7 expected).
