# Supplementary material for: Possible Ancestral Structure in Human Populations
Source: PLoS Genet. 2006 Jul 28;2(7):e105. doi: 10.1371/journal.pgen.0020105 (PMC1523253; doi:10.1371/journal.pgen.0020105)
Supplement: Table S2 — (29 KB PDF) [file pgen.0020105.st002.pdf]

| Name    | p-value | Function                                                                                        |
|---------|---------|-------------------------------------------------------------------------------------------------|
| xrcc4   | 0.0012  | X-ray repair complementing defective repair in Chinese hamster cells 4                          |
| tjp1    | 0.0052  | Tight junction protein 1 (zona occludens 1)                                                     |
| dut     | 0.009   | DUTP pyrophosphatase                                                                            |
| oxsr1   | 0.0188  | Oxidative-stress responsive 1                                                                   |
| tert    | 0.0252  | Telomerase reverse transcriptase                                                                |
| tpo     | 0.0298  | Thyroid peroxidase                                                                              |
| prdx2   | 0.0304  | Peroxiredoxin 2                                                                                 |
| abcb1   | 0.04    | ATP-binding cassette, sub-family B (MDR/TAP), member 1                                          |
| angptl7 | 0.046   | Angiopoietin-like 7                                                                             |
| rpa3    | 0.0486  | Replication protein A3, 14kDa                                                                   |
| ctnna1  | 0.05    | Catenin (cadherin-associated protein), alpha 1, 102kDa                                          |
| fmo4    | 0.0532  | Flavin containing monooxygenase 4                                                               |
| map2k4  | 0.0558  | Mitogen-activated protein kinase kinase 4                                                       |
| slc4a2  | 0.056   | Solute carrier family 4, anion exchanger, member 2 (erythrocyte membrane protein band 3-like 1) |
| rad18   | 0.06    | RAD18 homolog ( <i>S. cerevisiae</i> )                                                          |
| msr1    | 0.063   | Macrophage scavenger receptor 1                                                                 |
| csk     | 0.0634  | C-src tyrosine kinase                                                                           |
| odc1    | 0.0664  | Ornithine decarboxylase 1                                                                       |
| prdx5   | 0.0744  | Peroxiredoxin 5                                                                                 |
| foxm1   | 0.0746  | Forkhead box M1                                                                                 |
| fancf   | 0.0778  | Fanconi anemia, complementation group F                                                         |
| app     | 0.0804  | Amyloid beta (A4) precursor protein (protease nexin-II, Alzheimer disease)                      |
| tuba1   | 0.083   | Tubulin, alpha 1 (testis specific)                                                              |
| abl1    | 0.0832  | V-abl Abelson murine leukemia viral oncogene homolog 1                                          |
| ddb1    | 0.086   | Damage-specific DNA binding protein 1, 127kDa                                                   |
| eno1    | 0.0882  | Enolase 1, (alpha)                                                                              |
| calca   | 0.100   | Calcitonin/calcitonin-related polypeptide, alpha                                                |
| capn3   | 0.103   | Calpain 3, (p94)                                                                                |
| pold4   | 0.112   | Polymerase (DNA-directed), delta 4                                                              |
| polm    | 0.1182  | Polymerase (DNA directed), mu                                                                   |
| recql4  | 0.119   | RecQ protein-like 4                                                                             |
| trpm2   | 0.119   | Transient receptor potential cation channel, subfamily M, member 2                              |
| snca    | 0.121   | Synuclein, alpha (non A4 component of amyloid precursor)                                        |
| oxr1    | 0.1232  | Oxidation resistance 1                                                                          |
| cdc37   | 0.1266  | CDC37 cell division cycle 37 homolog ( <i>S. cerevisiae</i> )                                   |
| gpx6    | 0.128   | Glutathione peroxidase 6 (olfactory)                                                            |
| vnn1    | 0.136   | Vanin 1                                                                                         |
| sphar   | 0.1458  | S-phase response (cyclin-related)                                                               |
| blm     | 0.146   | Bloom syndrome                                                                                  |
| aoc3    | 0.1488  | Amine oxidase, copper containing 3 (vascular adhesion protein 1)                                |
| fdxr    | 0.1546  | Ferredoxin reductase                                                                            |
| mmp16   | 0.155   | Matrix metalloproteinase 16 (membrane-inserted)                                                 |
| txnrd1  | 0.1626  | Thioredoxin reductase 1                                                                         |
| mlh3    | 0.1674  | MutL homolog 3 ( <i>E. coli</i> )                                                               |
| h2afx   | 0.1696  | H2A histone family, member X                                                                    |
| xdh     | 0.1856  | Xanthine dehydrogenase                                                                          |
| tbxa2r  | 0.1864  | Thromboxane A2 receptor                                                                         |
| abl2    | 0.1898  | V-abl Abelson murine leukemia viral oncogene homolog 2 (arg, Abelson-related gene)              |
| sprp3   | 0.1916  | Small proline-rich protein 3                                                                    |
| nos2a   | 0.1934  | Nitric oxide synthase 2A (inducible, hepatocytes)                                               |

Table 1: List of most significant genes identified in the Yoruba sample, ordered by p-values. We find a significant deviation from the expected distribution of p-values (27 genes at  $p < 0.1$  for 13 expected).
